# Supplementary material for: On the predictability of turbulent fluxes from land: PLUMBER2 MIP experimental description and preliminary results
Source: Copernicus journal article supplement (doi:10.5194/bg-21-5517-2024), 2024-12-12
Supplement: Supplementary file 1 [file bg-21-5517-2024-supplement.pdf]

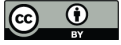

*Supplement of*

**On the predictability of turbulent fluxes from land:  
PLUMBER2 MIP experimental description and preliminary results**

**Gab Abramowitz et al.**

*Correspondence to:* Gab Abramowitz ([gabriel@unsw.edu.au](mailto:gabriel@unsw.edu.au))

The copyright of individual parts of the supplement might differ from the article licence.

## MAP - MAT

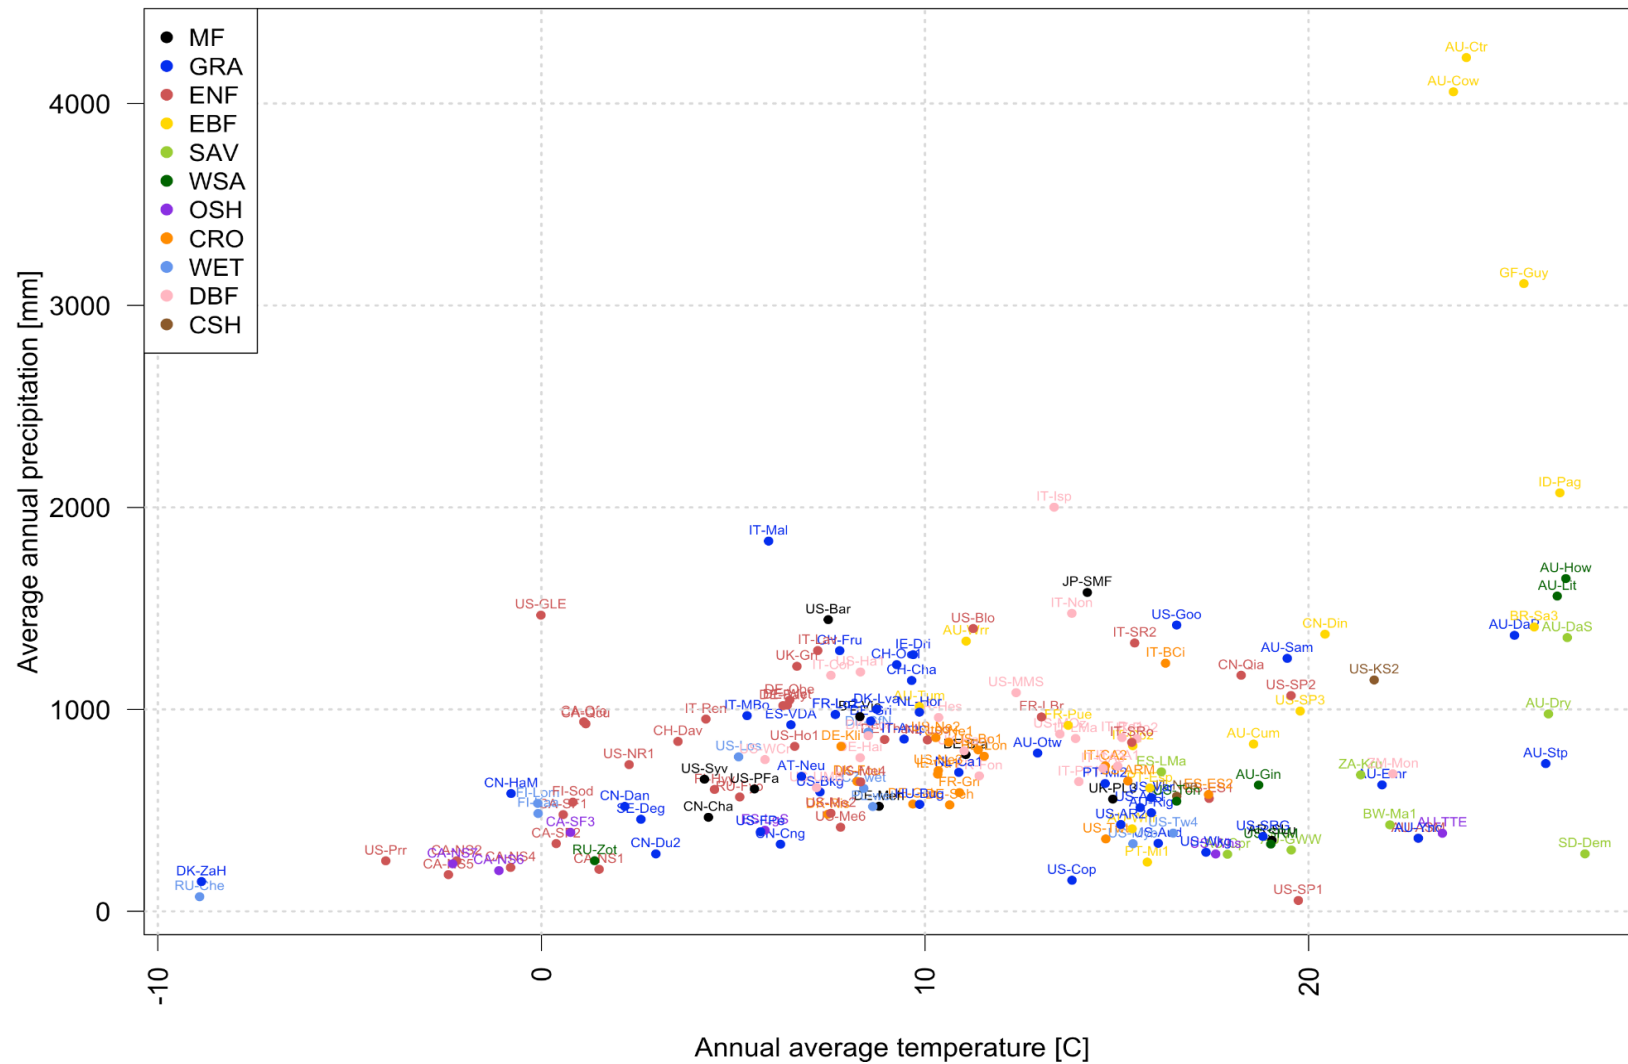

Figure S1: Distribution of site International Geosphere-Biosphere Programme vegetation types by Mean Annual Precipitation and Mean Annual Temperature. Vegetation types are: Mixed Forest (MF); Grassland (GRA); Evergreen Needleleaf (ENF); Evergreen Broadleaf (EBF); Savanna (SAV); Woody Savanna (WSA); Open Shrubland (OSH); Cropland (CRO); Wetland (WET); Deciduous Broadleaf (DBF); Closed Shrubland (CSH).

### Budyko curve and site vegetation type

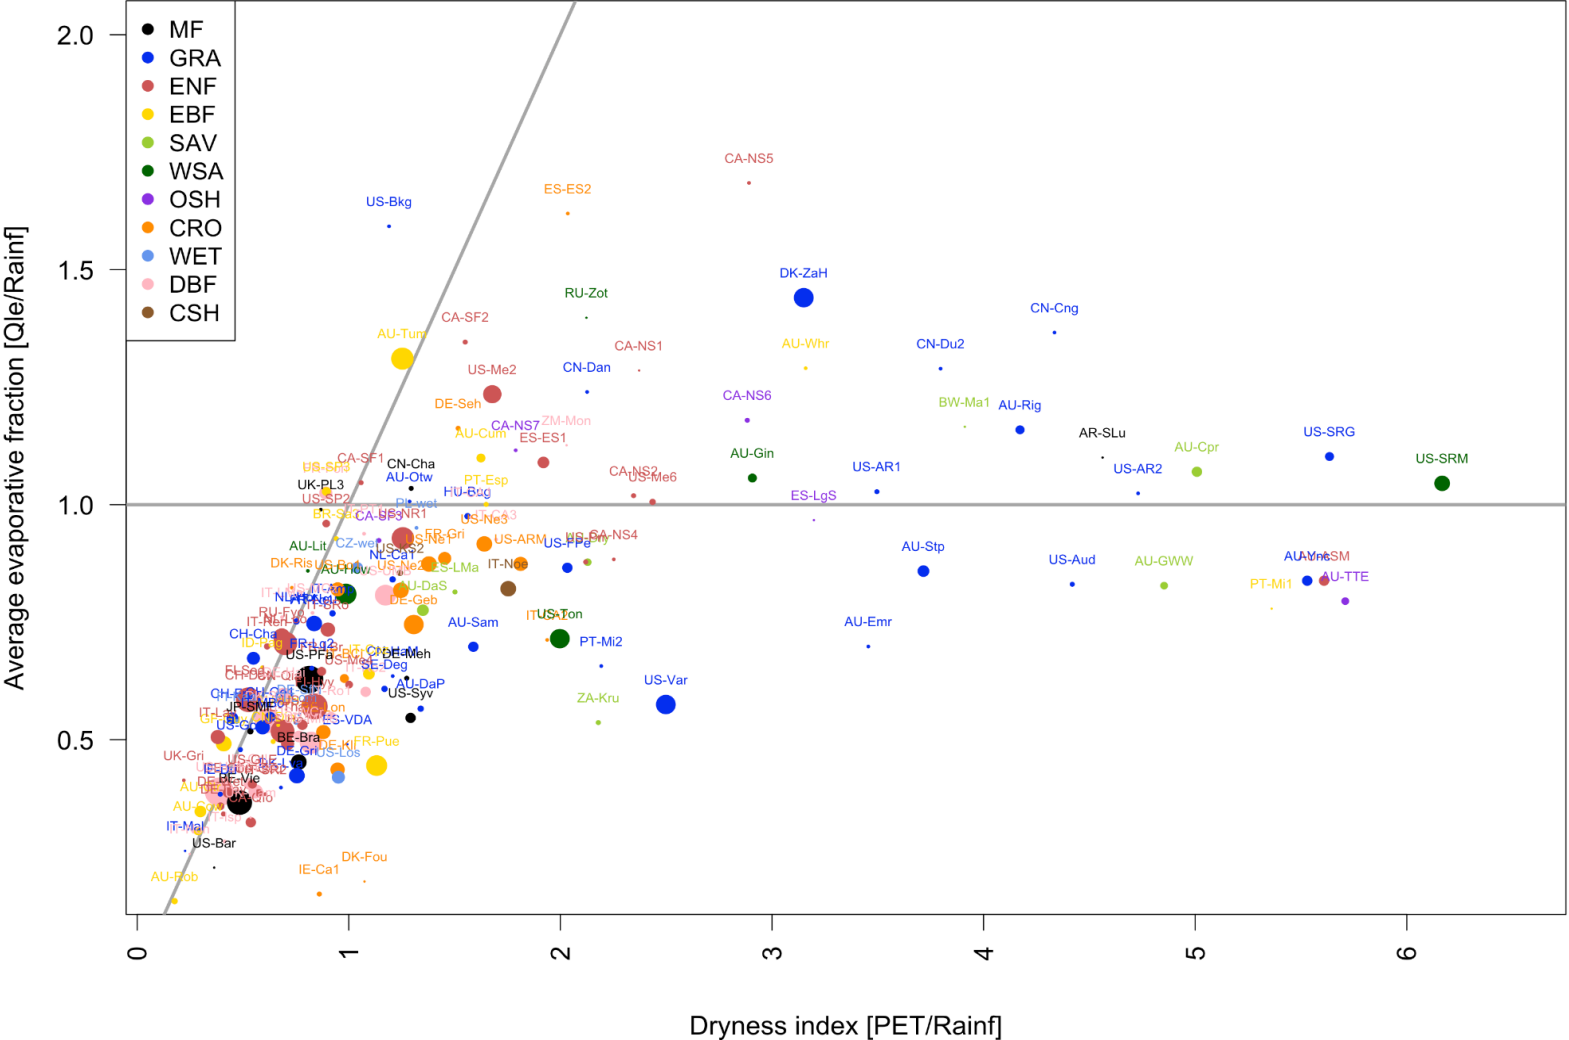

Figure S2a: Distribution of site IGBP vegetation types on a Budyko style plot, using raw (uncorrected) fluxes for all 170 sites. Dot sizes indicate the length of site data, ranging from 1 (shortest) to 21 years (longest) - see Table S2 below for site details. Vegetation types are: Mixed Forest (MF); Grassland (GRA); Evergreen Needleleaf (ENF); Evergreen Broadleaf (EBF); Savanna (SAV); Woody Savanna (WSA); Open Shrubland (OSH); Cropland (CRO); Wetland (WET); Deciduous Broadleaf (DBF); Closed Shrubland (CSH).

### Budyko curve and site vegetation type

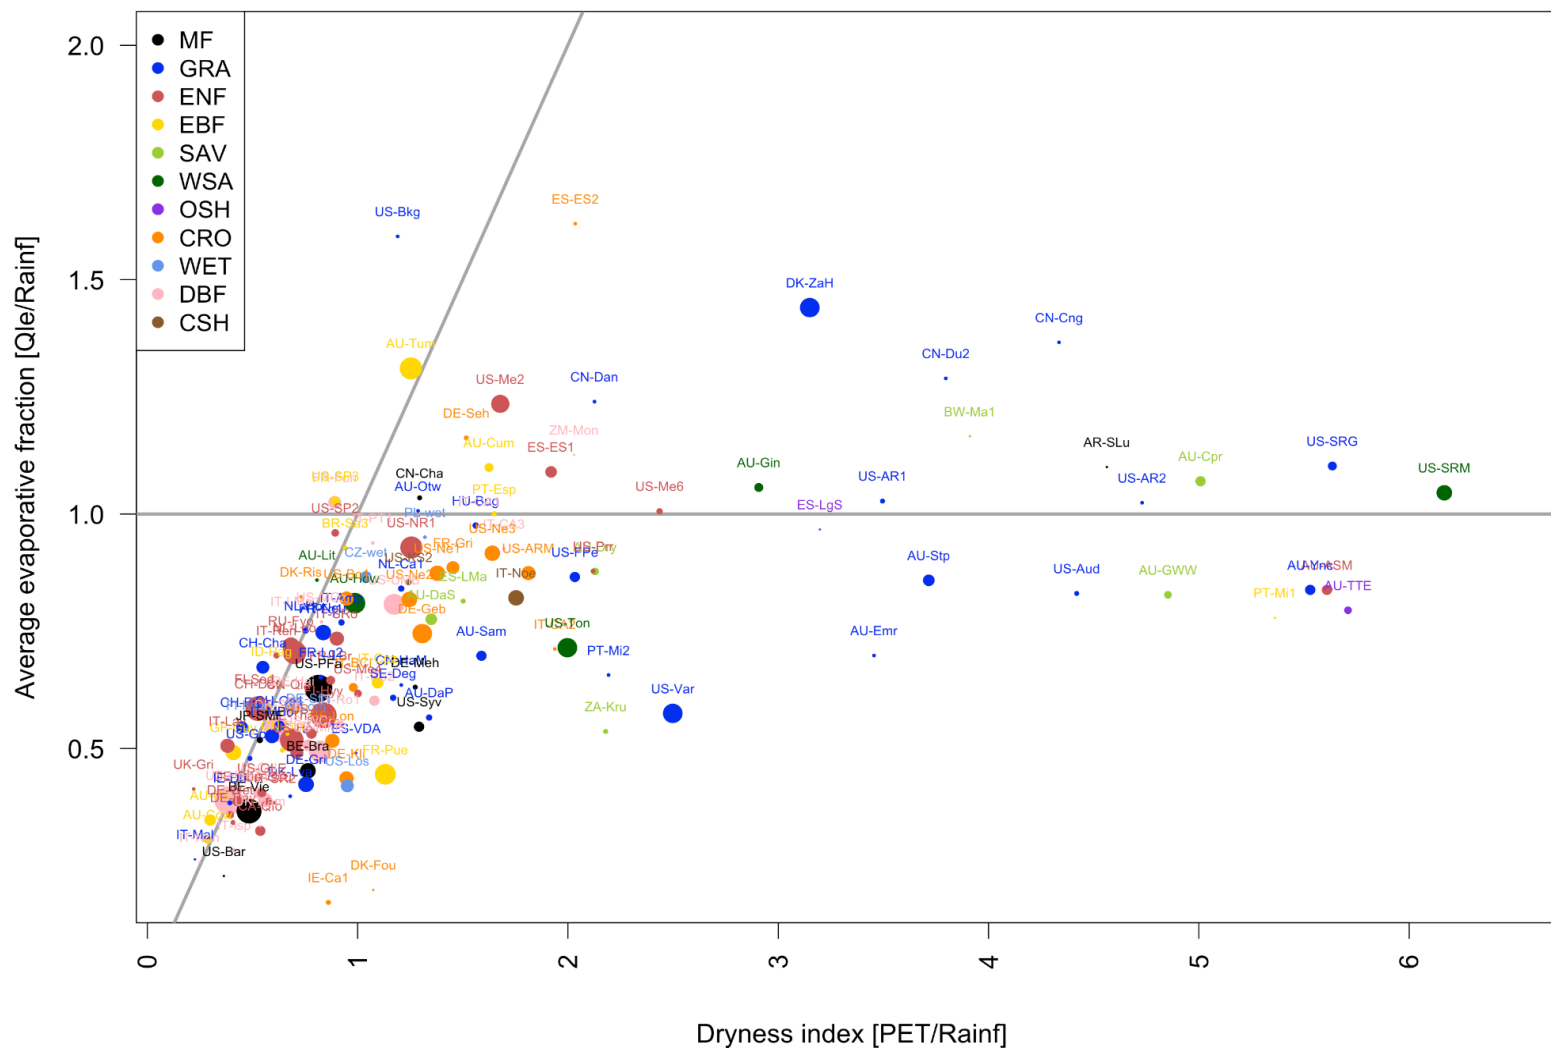

Figure S2b: Distribution of site IGBP vegetation types on a Budyko style plot, using raw (uncorrected) fluxes for 154 sites, that is with 16 of 170 removed because of precipitation issues. Dot sizes indicate the length of site data, ranging from 1 (shortest) to 21 years (longest) – see Table S2 below for site details. Vegetation types are: Mixed Forest (MF); Grassland (GRA); Evergreen Needleleaf (ENF); Evergreen Broadleaf (EBF); Savanna (SAV); Woody Savanna (WSA); Open Shrubland (OSH); Cropland (CRO); Wetland (WET); Deciduous Broadleaf (DBF); Closed Shrubland (CSH).







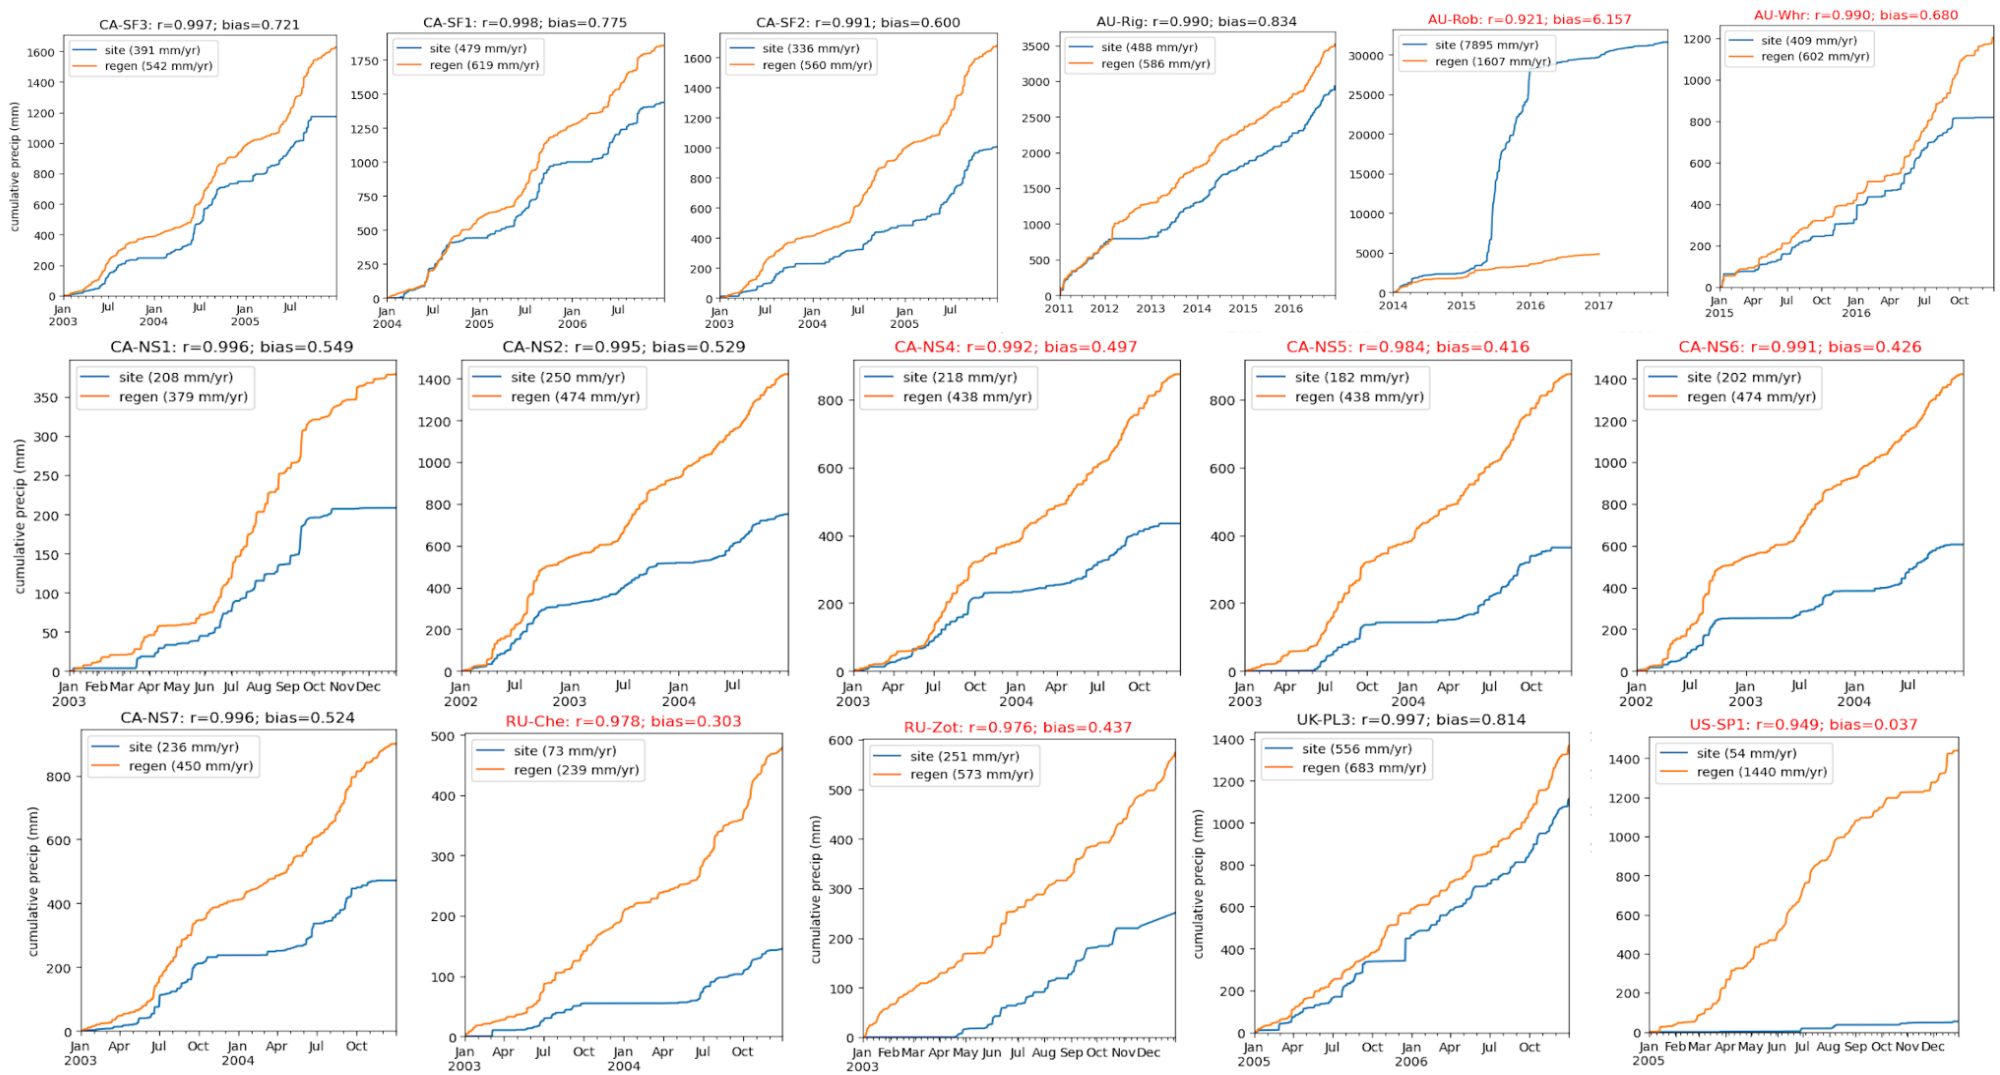

Figure S3: Cumulative site measured precipitation versus REGEN precipitation for the containing grid cell at the 16 sites excluded from this study for precipitation inconsistencies. Red text indicates sites with (arbitrarily chosen) thresholds of correlation  $< 0.99$  or ratio bias b/w REGEN and site data of  $> 20\%$ .

**Table S1: ALMA standard names, their definitions, and relationship to CMIP and CF-netCDF standards. This is a new iteration of the standard originally detailed by Polcher et al, (1998; 2000), and is also available on [modevaluation.org](http://modevaluation.org).**

| short_name_alma | short_name_cmip | CF standard_name                                                          | long_name                                | Definition / notes                                                                                                                                     | unit | direction       | dim | grp_cmip |
|-----------------|-----------------|---------------------------------------------------------------------------|------------------------------------------|--------------------------------------------------------------------------------------------------------------------------------------------------------|------|-----------------|-----|----------|
| SWnet           | rss             | surface_net_downward_shortwave_flux                                       | Net shortwave radiation                  | Incoming solar radiation less the simulated outgoing shortwave radiation, averaged over a grid cell                                                    | W/m2 | Down            | XYT | LEday    |
| LWnet           | rls             | surface_net_downward_longwave_flux                                        | Net longwave radiation                   | Incident longwave radiation less the simulated outgoing longwave radiation, averaged over a grid cell                                                  | W/m2 | Down            | XYT | LEday    |
| SWdown          | rsds            | surface_downwelling_shortwave_flux_in_air                                 | Downward short-wave radiation            |                                                                                                                                                        | W/m2 | Down            | XYT | LEday    |
| LWdown          | rls             | surface_downwelling_longwave_flux_in_air                                  | Downward long-wave radiation             |                                                                                                                                                        | W/m2 | Down            | XYT | LEday    |
| SWup            | rsus            | surface_upwelling_shortwave_flux_in_air                                   | Upward short-wave radiation              |                                                                                                                                                        | W/m2 | Up              | XYT | LEday    |
| LWup            | rlus            | surface_upwelling_longwave_flux_in_air                                    | Upward long-wave radiation               | This upward longwave flux is to be compared to an ISCCP derived product.                                                                               | W/m2 | Up              | XYT | LEday    |
| Qle             | hfls            | surface_upward_latent_heat_flux                                           | Latent heat flux                         | Energy of evaporation, averaged over a grid cell                                                                                                       | W/m2 | Up              | XYT | LEday    |
| Qh              | hfss            | surface_upward_sensible_heat_flux                                         | Sensible heat flux                       | Sensible energy, averaged over a grid cell                                                                                                             | W/m2 | Up              | XYT | LEday    |
| Qg              | hfds            | surface_downward_heat_flux                                                | Ground heat flux                         | Heat flux into the ground, averaged over a grid cell                                                                                                   | W/m2 | Down            | XYT | LEday    |
| Qgs             | hfdsn           | surface_downward_heat_flux_in_snow                                        | Downward heat flux into snow             |                                                                                                                                                        | W/m2 | Down            | XYT | LEday    |
| Qf              | hfmlt           | surface_snow_and_ice_melt_heat_flux                                       | Energy of fusion                         | Energy consumed or released during liquid/solid phase changes.                                                                                         | W/m2 | Soild to Liquid | XYT | LEday    |
| Qv              | hfsbl           | surface_snow_and_ice_sublimation_heat_flux                                | Energy of sublimation                    | Energy consumed or released during vapor/solid phase changes.                                                                                          | W/m2 | Soild to Vapor  | XYT | LEday    |
| Qtau            | tau             | surface_downward_stress                                                   | Momentum flux                            | module of the momentum lost by the atmosphere to the surface.                                                                                          | N/m2 | Down            | XYT | LEday    |
| Qa              | hfrs            | temperature_flux_due_to_rainfall_expressed_as_heat_flux_onto_snow_and_ice | Heat transferred to snowpack by rainfall | Heat transferred to a snow cover by rain.                                                                                                              | W/m2 | Down            | XYT | LEday    |
| DelSurfHeat     | dtes            | change_over_time_in_thermal_energy_content_of_surface                     | Change in surface heat storage           | Change in heat storage over the soil layer and the vegetation for which the energy balance is calculated, accumulated over the sampling time interval. | J/m2 | Increase        | XYT | LEday    |

|              |        |                                                                    |                                            |                                                                                                                                                                                                                         |         |          |      |       |
|--------------|--------|--------------------------------------------------------------------|--------------------------------------------|-------------------------------------------------------------------------------------------------------------------------------------------------------------------------------------------------------------------------|---------|----------|------|-------|
| DelColdCont  | dtesn  | change_over_time_in_thermal_energy_content_of_surface_snow_and_ice | Change in snow/ice cold content            | Change in cold content over the snow layer for which the energy balance is calculated, accumulated over the sampling time interval. This should also include the energy contained in the liquid water in the snow pack. | J/m2    | Increase | XYT  | LEday |
| AvgSurfT     | ts     | surface_temperature                                                | Average surface temperature                | Average of all vegetation, bare soil and snow skin temperatures                                                                                                                                                         | K       | -        | XYT  | LEday |
| SnowT        | tsns   | surface_snow_skin_temperature                                      | Snow Surface Temperature                   | Temperature of the snow surface as it interacts with the atmosphere, averaged over a grid cell.                                                                                                                         | K       | -        | XYT  | LEday |
| VegT         | tcs    | surface_canopy_skin_temperature                                    | Vegetation Canopy Temperature              | Vegetation temperature, averaged over all vegetation types                                                                                                                                                              | K       | -        | XYT  | LEday |
| BaresoilT    | tgs    | surface_ground_skin_temperature                                    | Temperature of bare soil                   | Surface bare soil temperature                                                                                                                                                                                           | K       | -        | XYT  | LEday |
| RadT         | tr     | surface_radiative_temperature                                      | Surface Radiative Temperature              | Effective radiative surface temperature, averaged over the grid cell                                                                                                                                                    | K       | -        | XYT  | LEday |
| Albedo       | albs   | surface_albedo                                                     | Surface Albedo                             | Grid cell average albedo for all wavelengths.                                                                                                                                                                           | -       | -        | XYT  | LEday |
| SAlbedo      | albsn  | snow_and_ice_albedo                                                | Snow Albedo                                | Albedo of the snow-covered surface, averaged over the grid cell.                                                                                                                                                        | -       | -        | XYT  | LEday |
| SnowFrac     | snc    | surface_snow_area_fraction                                         | Snow covered fraction                      | Grid cell snow covered fraction                                                                                                                                                                                         | -       | -        | XYT  | LEday |
| CAIbedo      | albc   | canopy_albedo                                                      | Canopy Albedo                              |                                                                                                                                                                                                                         | -       | -        | XYT  | LEday |
| CanoFrac     | cnc    | surface_canopy_area_fraction                                       | Canopy covered fraction                    |                                                                                                                                                                                                                         | -       | -        | XYT  | LEday |
| SoilTemp     | tsl    | soil_temperature                                                   | Average layer soil temperature             | Average soil temperature in each user-defined soil layer (3D variable)                                                                                                                                                  | K       | -        | XYZT | LEday |
| SnowTProf    | tsnl   | snow_temperature                                                   | Temperature profile in the snow            | Temperature in the snow pack present in the grid-cell. 3D variable for multi-layer snow schemes.                                                                                                                        | K       | -        | XYZT | LEday |
| TairMax      | tasmax | air_temperature_maximum                                            | Daily Maximum Near-Surface Air Temperature |                                                                                                                                                                                                                         | K       | -        | XYT  | LEday |
| TairMin      | tasmin | air_temperature_minimum                                            | Daily Minimum Near-Surface Air Temperature |                                                                                                                                                                                                                         | K       | -        | XYT  | LEday |
| CCover       | clt    | cloud_area_fraction                                                | Total cloud fraction                       |                                                                                                                                                                                                                         | -       | -        | XYT  | LEday |
| Precip       | pr     | precipitation_flux                                                 | Precipitation rate                         |                                                                                                                                                                                                                         | kg/m2/s | Down     | XYT  | LWday |
| <i>Rainf</i> | prra   | rainfall_flux                                                      | Rainfall rate                              |                                                                                                                                                                                                                         | kg/m2/s | Down     | XYT  | LWday |
| <i>Snowf</i> | prsn   | snowfall_flux                                                      | Snowfall rate                              |                                                                                                                                                                                                                         | kg/m2/s | Down     | XYT  | LWday |
| CRainf       | prrc   | convective_rainfall_flux                                           | Convective Rainfall rate                   |                                                                                                                                                                                                                         | kg/m2/s | Down     | XYT  | LWday |
| CSnowf       | prsn   | convective_snowfall_flux                                           | Convective Snowfall rate                   |                                                                                                                                                                                                                         | kg/m2/s | Down     | XYT  | LWday |
| PrecipCanop  | prveg  | precipitation_flux_onto_canopy                                     | Precipitation onto canopy                  |                                                                                                                                                                                                                         | kg/m2/s | Down     | XYT  | LWday |
| Evap         | et     | surface_evapotranspiration                                         | Total Evapotranspiration                   |                                                                                                                                                                                                                         | kg/m2/s | Up       | XYT  | LWday |
| ECanop       | ec     | liquid_water_evaporation_flux_from_canopy                          | Interception evaporation                   |                                                                                                                                                                                                                         | kg/m2/s | Up       | XYT  | LWday |
| TVeg         | tran   | Transpiration                                                      | Vegetation transpiration                   |                                                                                                                                                                                                                         | kg/m2/s | Up       | XYT  | LWday |
| ESoil        | es     | liquid_water_evaporation_flux_from_soil                            | Bare soil evaporation                      |                                                                                                                                                                                                                         | kg/m2/s | Up       | XYT  | LWday |

|              |         |                                                   |                                      |                                                                                                                                          |         |                 |     |       |
|--------------|---------|---------------------------------------------------|--------------------------------------|------------------------------------------------------------------------------------------------------------------------------------------|---------|-----------------|-----|-------|
| EWater       | eow     | liquid_water_evaporation_flux_from_open_water     | Open water evaporation               |                                                                                                                                          | kg/m2/s | Up              | XYT | LWday |
| EvapSnow     | esn     | liquid_water_evaporation_flux_from_surface_snow   | Snow Evaporation                     |                                                                                                                                          | kg/m2/s | Up              | XYT | LWday |
| SubSnow      | sbl     | surface_snow_and_ice_sublimation_flux             | Snow sublimation                     |                                                                                                                                          | kg/m2/s | Up              | XYT | LWday |
| SubSurf      | slbnosn | sublimation_amount_assuming_no_snow               | Sublimation of the snow free area    |                                                                                                                                          | kg/m2/s | Up              | XYT | LWday |
| PotEvap      | potet   | water_potential_evapotranspiration_flux           | Potential Evapotranspiration         |                                                                                                                                          | kg/m2/s | Up              | XYT | LWday |
| Qr           | mrro    | runoff_flux                                       | Total runoff                         |                                                                                                                                          | kg/m2/s | Out             | XYT | LWday |
| Qs           | mrros   | surface_runoff_flux                               | Surface runoff                       |                                                                                                                                          | kg/m2/s | Out             | XYT | LWday |
| Qsb          | mrrob   | subsurface_runoff_flux                            | Subsurface runoff                    |                                                                                                                                          | kg/m2/s | Out             | XYT | LWday |
| Qsm          | snm     | surface_snow_and_ice_melt_flux                    | Snowmelt                             |                                                                                                                                          | kg/m2/s | Solid to liquid | XYT | LWday |
| Qfz          | snrefr  | surface_snow_and_ice_refreezing_flux              | Re-freezing of water in the snow     |                                                                                                                                          | kg/m2/s | Liquid to solid | XYT | LWday |
| Qst          | snmsl   | surface_snow_melt_flux_into_soil_layer            | Water flowing out of snowpack        |                                                                                                                                          | kg/m2/s | Out             | XYT | LWday |
| Qgwr         | qgwr    | water_flux_from_soil_layer_to_groundwater         | Groundwater recharge from soil layer |                                                                                                                                          | kg/m2/s | Out             | XYT | LWday |
| Qrec         |         |                                                   | Recharge from river to flood plain   |                                                                                                                                          | kg/m2/s | Out             | XYT | LWday |
| Inf          | rivi    | water_flux_from_upstream                          | River Inflow                         |                                                                                                                                          | m3/s    | In              | XYT | LWday |
| Dis          | rivo    | water_flux_to_downstream                          | River Discharge                      |                                                                                                                                          | m3/s    | Out             | XYT | LWday |
| DelSoilMoist | dslw    | change_over_time_in_mass_content_of_water_in_soil | Change in soil moisture              | Change in the simulated vertically integrated soil water volume, averaged over a grid cell, accumulated over the sampling time interval. | kg/m2   | Increase        | XYT | LWday |
| DelSWE       | dsn     | change_over_time_in_surface_snow_and_ice_amount   | Change in snow water equivalent      |                                                                                                                                          | kg/m2   | Increase        | XYT | LWday |
| DelSurfStor  | dsw     | change_over_time_in_surface_water_amount          | Change in Surface Water Storage      |                                                                                                                                          | kg/m2   | Increase        | XYT | LWday |
| DelIntercept | dcw     | change_over_time_in_canopy_water_amount           | Change in interception storage       |                                                                                                                                          | kg/m2   | Increase        | XYT | LWday |
| DelGW        | dgw     | change_over_time_in_groundwater                   | Change in groundwater                |                                                                                                                                          | kg/m2   | Increase        | XYT | LWday |
| DelRivStor   | drivw   | change_over_time_in_river_water_amount            | Change in river storage              |                                                                                                                                          | kg/m2   | Increase        | XYT | LWday |
| RootMoist    | rzwc    | water_content_of_root_zone                        | Root zone soil moisture              |                                                                                                                                          | kg/m2   | -               | XYT | LWday |
| Canoplnt     | cw      | canopy_water_amount                               | Total canopy water storage           |                                                                                                                                          | kg/m2   | -               | XYT | LWday |

|              |         |                                                    |                                           |                                                                                                                                     |       |   |      |       |
|--------------|---------|----------------------------------------------------|-------------------------------------------|-------------------------------------------------------------------------------------------------------------------------------------|-------|---|------|-------|
| SWE          | snw     | surface_snow_amount                                | Snow Water Equivalent                     | Total water mass of the snowpack (liquid or frozen), averaged over a grid cell. 3D variable for multi-layer snow schemes.           | kg/m2 | - | XYZT | LWday |
| SWEVeg       | snwc    | canopy_snow_amount                                 | SWE intercepted by the vegetation         | Total water mass of the snowpack (liquid or frozen), averaged over a grid cell and intercepted by the canopy.                       | kg/m2 | - | XYT  | LWday |
| LiqSnow      | lwsnl   | liquid_water_content_of_snow_layer                 | Liquid water in snow pack                 |                                                                                                                                     | kg/m2 | - | XYZT | LWday |
| SurfStor     | sw      | surface_water_amount_assuming_no_snow              | Surface Water Storage                     | Total liquid water storage, other than soil, snow or interception storage (i.e. lakes, river channel or depression storage).        | kg/m2 | - | XYT  | LWday |
|              | mrso    | mass_content_of_water_in_soil                      | Soil Moisture                             |                                                                                                                                     |       |   |      |       |
| SoilMoist    | mrlsl   | moisture_content_of_soil_layer                     | Average layer soil moisture               | Soil water content in each user-defined soil layer (3D variable). Includes the liquid, vapor and solid phases of water in the soil. | kg/m2 | - | XYZT | LWday |
| SoilMoistTop | mrsos   | moisture_content_of_soil_layer                     | Moisture in top soil (10cm) layer         |                                                                                                                                     | kg/m2 | - | XYT  | LWday |
| SoilWet      | mrsow   | relative_soil_moisture_content_above_wilting_point | Total Soil Wetness                        | Vertically integrated soil moisture divided by maximum allowable soil moisture above wilting point.                                 | -     | - | XYT  | LWday |
| WaterTableD  | wtd     | depth_of_soil_moisture_saturation                  | Water table depth                         |                                                                                                                                     | m     | - | XYT  | LWday |
| TWS          | tw      | canopy_and_surface_and_subsurface_water_amount     | Terrestrial Water Storage                 |                                                                                                                                     | kg/m2 | - | XYT  | LWday |
| SMLiqFrac    | mrlqso  | mass_fraction_of_unfrozen_water_in_soil_layer      | Average layer fraction of liquid moisture | Fraction of soil moisture mass in the liquid phase in each user-defined soil layer (3D variable)                                    | -     | - | XYZT | LWday |
| SMFrozFrac   | mrfsofr | mass_fraction_of_frozen_water_in_soil_layer        | Average layer fraction of frozen moisture | Fraction of soil moisture mass in the solid phase in each user-defined soil layer (3D variable)                                     | -     | - | XYZT | LWday |
| RainSnowFrac | prsn    | mass_fraction_of_rainfall_onto_snow                | Fraction of rainfall on snow.             | The fraction of the grid averaged rainfall which falls on the snow pack                                                             | -     | - | XYT  | LWday |
| SnowSnowFrac | prnsn   | mass_fraction_of_snowfall_onto_snow                | Fraction of snowfall on snow.             | The fraction of the snowfall which falls on the snow pack                                                                           | -     | - | XYT  | LWday |
| SliqFrac     | lqsn    | mass_fraction_of_liquid_water_in_snow              | Snow liquid fraction                      | Fraction of Snow Equivalent Water which is in the liquid phase. 3D variable for multi-layer snow schemes.                           | -     | - | XYZT | LWday |
| SnowDepth    | snd     | surface_snow_thickness                             | Depth of snow layer                       | Depth of each layer of snow is a 3D variable for multi-layer snow schemes and the total snow depth for simpler models.              | m     | - | XYT  | LWday |
| SnowAge      | agesno  | age_of_surface_snow                                | Snow Age                                  |                                                                                                                                     | day   | - | XYT  | LWday |
| SnowSoot     | sootsn  | soot_content_of_surface_snow                       | Snow Soot Content                         |                                                                                                                                     | kg/m2 | - | XYT  | LWday |
| IceFrac      | sic     | sea_ice_area_fraction                              | Ice-covered fraction                      | The fraction of the grid cell covered by sea-ice                                                                                    | -     | - | XYT  | LWday |
| IceT         | sit     | sea_ice_thickness                                  | Sea-ice thickness                         | The thickness of the ice layer on simulated water areas.                                                                            | m     | - | XYT  | LWday |

|                  |             |                                                                                                                                        |                                                             |                                                                                                                                                                  |         |          |     |       |
|------------------|-------------|----------------------------------------------------------------------------------------------------------------------------------------|-------------------------------------------------------------|------------------------------------------------------------------------------------------------------------------------------------------------------------------|---------|----------|-----|-------|
| Fdepth           | dfr         | depth_of_frozen_soil                                                                                                                   | Frozen soil depth                                           | Depth from surface to the first zero degree isotherm. Above this isotherm $T < 0o$ , and below this line $T > 0o$ .                                              | m       | Down     | XYT | LWday |
| Tdepth           | dmlt        | depth_of_subsurface_melting                                                                                                            | Depth to soil thaw                                          | Depth from surface to the zero degree isotherm. Above this isotherm $T > 0o$ , and below this line $T < 0o$ .                                                    | m       | Down     | XYT | LWday |
| PermafrostT      | tpf         | permafrost_layer_thickness                                                                                                             | Permafrost Layer Thickness                                  |                                                                                                                                                                  | m       | -        | XYT | LWday |
| LiqPermafrost    | pflw        | liquid_water_content_of_permafrost_layer                                                                                               | Liquid water content of permafrost layer                    |                                                                                                                                                                  | kg/m2   | -        | XYT | LWday |
| ACond            |             |                                                                                                                                        | Aerodynamic conductance                                     |                                                                                                                                                                  | m/s     | -        | XYT | LWday |
| AResist          | ares        | aerodynamic_resistance                                                                                                                 | Aerodynamic resistance                                      |                                                                                                                                                                  | s/m     | -        | XYT | LWday |
| NudgIncSoilMoist | nudginc_sm  | nudging_increment_in_water_content_of_soil_layer                                                                                       | Nudging Increment of Water in Soil Moisture                 |                                                                                                                                                                  | kg/m2   | Increase | XYT |       |
| NudgIncSWE       | nudginc_swe | nudging_increment_in_surface_snow_and_ice_amount                                                                                       | Nudging Increment of Water in Snow                          | Total water storage change due to nudging in LFMIP                                                                                                               | kg/m2   | Increase | XYT |       |
| RH               | hur         | relative_humidity                                                                                                                      | Relative humidity                                           |                                                                                                                                                                  | %       | -        | XYT | LWday |
| RHMax            | hurmax      | relative_humidity_maximum                                                                                                              | Daily Maximum Near-Surface Relative Humidity                |                                                                                                                                                                  | %       | -        | XYT | LWday |
| RHMin            | hurmin      | relative_humidity_minimum                                                                                                              | Daily Minimum Near-Surface Relative Humidity                |                                                                                                                                                                  | %       | -        | XYT | LWday |
| GPP              | gpp         | gross_primary_productivity_of_carbon                                                                                                   | Gross Primary Production                                    | Carbon Mass Flux out of Atmosphere due to Gross Primary Production on Land                                                                                       | kg/m2/s | Down     | XYT | LCmon |
| NPP              | npp         | net_primary_productivity_of_carbon                                                                                                     | Net Primary Production                                      | Carbon Mass Flux out of Atmosphere due to Net Primary Production on Land                                                                                         | kg/m2/s | Down     | XYT | LCmon |
| NEE              | nep         | surface_net_downward_mass_flux_of_carbon_dioxide_expressed_as_carbon_due_to_all_land_processes_excluding_anthropogenic_land_use_change | Net Ecosystem Exchange                                      | Net Carbon Mass Flux out of Atmosphere due to Net Ecosystem Productivity on Land.                                                                                | kg/m2/s | Down     | XYT | LCmon |
| AutoResp         | ra          | plant_respiration_carbon_flux                                                                                                          | Autotrophic Respiration                                     | Carbon Mass Flux into Atmosphere due to Autotrophic (Plant) Respiration on Land; Autotrophic respiration includes maintenance respiration and growth respiration | kg/m2/s | Up       | XYT | LCmon |
| HeteroResp       | rh          | heterotrophic_respiration_carbon_flux                                                                                                  | Heterotrophic Respiration                                   | Carbon Mass Flux into Atmosphere due to Heterotrophic Respiration on Land                                                                                        | kg/m2/s | Up       | XYT | LCmon |
|                  |             | surface_net_upward_mass_flux_of_carbon_dioxide_expressed_as_carbon_due_to_emission_from_anthropogenic_land_use_change                  | Net Carbon Mass Flux into Atmosphere due to Land Use Change | human changes to land (excluding forest regrowth) accounting possibly for different time-scales related to fate of the wood, for example.                        | kg/m2/s | Up       | XYT | LCmon |
| TotLivBiom       |             |                                                                                                                                        | Total Living Biomass                                        | Total carbon content of the living biomass                                                                                                                       | kg/m2   | -        | XYT | LCmon |
| TotSoilCarb      | cSoil       | soil_carbon_content                                                                                                                    | Carbon Mass in Soil Pool                                    | Total soil and litter carbon content integrated over the entire soil profile                                                                                     | kg/m2   | -        | XYT | LCmon |



|        |              |                                                             |                                                                                 |                                                                                                                                              |         |      |     |       |
|--------|--------------|-------------------------------------------------------------|---------------------------------------------------------------------------------|----------------------------------------------------------------------------------------------------------------------------------------------|---------|------|-----|-------|
|        | cLitter      | litter_carbon_content                                       | Carbon Mass in Litter Pool                                                      |                                                                                                                                              | kg/m2   | -    | XYT | LCmon |
|        | cVeg         | vegetation_carbon_content                                   | Carbon Mass in Vegetation                                                       |                                                                                                                                              | kg/m2   | -    | XYT | LCmon |
|        | cProduct     | carbon_content_of_products_of_anthropogenic_land_use_change | Carbon Mass in Products of Land Use Change                                      |                                                                                                                                              | kg/m2   | -    | XYT | LCmon |
|        | cLeaf        | leaf_carbon_content                                         | Carbon Mass in Leaves                                                           |                                                                                                                                              | kg/m2   | -    | XYT | LCmon |
|        | cWood        | wood_carbon_content                                         | Carbon Mass in Wood                                                             |                                                                                                                                              | kg/m2   | -    | XYT | LCmon |
|        | cRoot        | root_carbon_content                                         | Carbon Mass in Roots                                                            |                                                                                                                                              | kg/m2   | -    | XYT | LCmon |
|        | cMisc        | miscellaneous_living_matter_carbon_content                  | Carbon Mass in Other Living Compartments on Land                                |                                                                                                                                              | kg/m2   | -    | XYT | LCmon |
|        | fVegLitter   | litter_carbon_flux                                          | Total Carbon Mass Flux from Vegetation to Litter                                |                                                                                                                                              | kg/m2/s | -    | XYT | LCmon |
|        | fLitterSoil  | carbon_mass_flux_into_soil_from_litter                      | Total Carbon Mass Flux from Litter to Soil                                      |                                                                                                                                              | kg/m2/s | -    | XYT | LCmon |
|        | fVegSoil     | carbon_mass_flux_into_soil_from_vegetation_excluding_litter | Total Carbon Mass Flux from Vegetation Directly to Soil                         |                                                                                                                                              | kg/m2/s | -    | XYT | LCmon |
|        | treeFrac     | area_fraction                                               | Tree Cover Fraction                                                             | fraction of entire grid cell that is covered by trees.                                                                                       | %       | -    | XYT | LCmon |
|        | grassFrac    | area_fraction                                               | Natural Grass Fraction                                                          | fraction of entire grid cell that is covered by natural grass.                                                                               | %       | -    | XYT | LCmon |
|        | shrubFrac    | area_fraction                                               | Shrub Fraction                                                                  | fraction of entire grid cell that is covered by shrub.                                                                                       | %       | -    | XYT | LCmon |
|        | cropFrac     | area_fraction                                               | Crop Fraction                                                                   | fraction of entire grid cell that is covered by crop.                                                                                        | %       | -    | XYT | LCmon |
|        | pastureFrac  | area_fraction                                               | Anthropogenic Pasture Fraction                                                  | fraction of entire grid cell that is covered by anthropogenic pasture.                                                                       | %       | -    | XYT | LCmon |
|        | baresoilFrac | area_fraction                                               | Bare Soil Fraction                                                              | fraction of entire grid cell that is covered by bare soil.                                                                                   | %       | -    | XYT | LCmon |
|        | residualFrac | area_fraction                                               | Fraction of Grid Cell that is Land but Neither Vegetation-Covered nor Bare Soil | fraction of entire grid cell that is land and is covered by "non-vegetation" and "non-bare-soil" (e.g., urban, ice, lakes, etc.)             | %       | -    | XYT | LCmon |
| LAI    | lai          | leaf_area_index                                             | Leaf Area Index                                                                 | a ratio obtained by dividing the total upper leaf surface area of vegetation by the (horizontal) surface area of the land on which it grows. | -       | -    | XYT | LCmon |
| SWdown | rsds         | surface_downwelling_shortwave_flux_in_air                   | Downward short-wave radiation                                                   |                                                                                                                                              | W/m2    | Down | XYT | L3hr  |
| LWdown | rlsds        | surface_downwelling_longwave_flux_in_air                    | Downward long-wave radiation                                                    |                                                                                                                                              | W/m2    | Down | XYT | L3hr  |

|               |      |                                        |                                       |  |         |       |     |      |
|---------------|------|----------------------------------------|---------------------------------------|--|---------|-------|-----|------|
| <i>Qair</i>   | huss | specific_humidity                      | Near surface specific humidity        |  | kg/kg   | -     | XYT | L3hr |
| <i>Tair</i>   | ta   | air_temperature                        | Near surface air temperature          |  | K       | -     | XYT | L3hr |
| <i>Psurf</i>  | ps   | surface_air_pressure                   | Surface Pressure                      |  | Pa      | -     | XYT | L3hr |
| <i>Wind</i>   | ws   | wind_speed                             | Near surface wind speed               |  | m/s     | -     | XYT | L3hr |
| <i>Wind_N</i> | va   | northward_wind                         | Near surface northward wind component |  | m/s     | North | XYT | L3hr |
| <i>Wind_E</i> | ua   | eastward_wind                          | Near surface eastward wind component  |  | m/s     | East  | XYT | L3hr |
| <i>Precip</i> | pr   | precipitation_flux                     | Precipitation rate                    |  | kg/m2/s | Down  | XYT | L3hr |
| <i>Rainf</i>  | prr  | rainfall_flux                          | Rainfall rate                         |  | kg/m2/s | Down  | XYT | L3hr |
| <i>Snowf</i>  | prsn | snowfall_flux                          | Snowfall rate                         |  | kg/m2/s | Down  | XYT | L3hr |
| <i>CRainf</i> | prrc | convective_rainfall_flux               | Convective Rainfall rate              |  | kg/m2/s | Down  | XYT | L3hr |
| <i>CSnowf</i> | prsn | convective_snowfall_flux               | Convective Snowfall rate              |  | kg/m2/s | Down  | XYT | L3hr |
| <i>CCover</i> | clt  | cloud_area_fraction                    | Total cloud fraction                  |  | -       | -     | XYT | L3hr |
| <i>CO2air</i> | co2c | mole_fraction_of_carbon_dioxide_in_air | Near surface CO2 concentration        |  | -       | -     | XYT | L3hr |

**Table S2: List of 170 sites used for PLUMBER2 (from Ukkola et al, 2022), site properties and references. Each site has a more detailed profile with additional references on [modevaluation.org](http://modevaluation.org). More information from [www.ozflux.org.au](http://www.ozflux.org.au) and [fluxnet.org](http://fluxnet.org). Vegetation types are: Mixed Forest (MF); Grassland (GRA); Evergreen Needleleaf (ENF); Evergreen Broadleaf (EBF); Savanna (SAV); Woody Savanna (WSA); Open Shrubland (OSH); Cropland (CRO); Wetland (WET); Deciduous Broadleaf (DBF); Closed Shrubland (CSH)**

| Fluxnet site code | Time period | IGBP veg type | Veg height (m) | Ref height (m) | Elevation (m) | Data source | Default LAI |
|-------------------|-------------|---------------|----------------|----------------|---------------|-------------|-------------|
| AR-SLu            | 2010        | MF            | 4.5            | 11             | 500           | FLUXNET2015 | MODIS       |
| AT-Neu            | 2002-2012   | GRA           | 1              | 3              | 970           | FLUXNET2015 | Copernicus  |
| AU-ASM            | 2011-2017   | ENF           | 6.5            | 11.6           | 606           | OzFlux      | Copernicus  |
| AU-Cow            | 2010-2015   | EBF           | 22             | 35             | 86            | OzFlux      | Copernicus  |
| AU-Cpr            | 2011-2017   | SAV           | 4              | 20             | 76            | OzFlux      | MODIS       |
| AU-Ctr            | 2010-2017   | EBF           | 25             | 45             | 66            | OzFlux      | MODIS       |
| AU-Cum            | 2013-2018   | EBF           | 23             | 30             | 200           | OzFlux      | MODIS       |
| AU-DaP            | 2011-2017   | GRA           | 0.3            | 15             | 116           | OzFlux      | Copernicus  |
| AU-DaS            | 2010-2017   | SAV           | 16.4           | 21             | 108           | OzFlux      | MODIS       |
| AU-Dry            | 2011-2015   | SAV           | 12.3           | 15             | 191           | OzFlux      | Copernicus  |
| AU-Emr            | 2012-2013   | GRA           | 2              | 5.6            | 177           | OzFlux      | Copernicus  |
| AU-Gin            | 2012-2017   | WSA           | 7              | 15             | 51            | OzFlux      | MODIS       |
| AU-GWW            | 2013-2017   | SAV           | 18             | 35             | 504           | OzFlux      | MODIS       |
| AU-How            | 2003-2017   | WSA           | 16             | 23             | 41            | OzFlux      | MODIS       |
| AU-Lit            | 2016-2017   | WSA           | 20             | 31             | 200           | OzFlux      | Copernicus  |
| AU-Otw            | 2009-2010   | GRA           | 0.1            | 10             | 54            | OzFlux      | Copernicus  |
| AU-Rig            | 2011-2016   | GRA           | 0.4            | 2.5            | 133           | OzFlux      | MODIS       |
| AU-Rob            | 2014-2017   | EBF           | 35             | 40             | 710           | OzFlux      | Copernicus  |
| AU-Sam            | 2011-2017   | GRA           | 0.5            | 2              | 170           | OzFlux      | Copernicus  |
| AU-Stp            | 2010-2017   | GRA           | 0.5            | 4.8            | 252           | OzFlux      | Copernicus  |
| AU-TTE            | 2013-2017   | OSH           | 4.85           | 9.81           | 553           | OzFlux      | MODIS       |
| AU-Tum            | 2002-2017   | EBF           | 40             | 70             | 1200          | OzFlux      | Copernicus  |
| AU-Whr            | 2015-2016   | EBF           | 28             | 32             | 152           | OzFlux      | MODIS       |
| AU-Wrr            | 2016-2017   | EBF           | 55             | 80             | 100           | OzFlux      | MODIS       |
| AU-Ync            | 2011-2017   | GRA           | 0.5            | 8              | 125           | OzFlux      | Copernicus  |
| BE-Bra            | 2004-2014   | MF            | 21             | 39             | 16            | FLUXNET2015 | MODIS       |
| BE-Lon            | 2005-2014   | CRO           | 1              | 2.7            | 167           | FLUXNET2015 | Copernicus  |

|        |           |     |      |      |       |             |            |
|--------|-----------|-----|------|------|-------|-------------|------------|
| BE-Vie | 1997-2014 | MF  | 35   | 40   | 493   | FLUXNET2015 | Copernicus |
| BR-Sa3 | 2001-2003 | EBF | 40   | 64   | 100   | FLUXNET2015 | MODIS      |
| BW-Ma1 | 2000      | SAV | 8    | 12.6 | 929   | LaThuile    | MODIS      |
| CA-NS1 | 2003      | ENF | 20   | 24   | 260   | FLUXNET2015 | MODIS      |
| CA-NS2 | 2002-2004 | ENF | 20   | 20   | 260   | FLUXNET2015 | Copernicus |
| CA-NS4 | 2003-2004 | ENF | 7    | 10   | 260   | FLUXNET2015 | MODIS      |
| CA-NS5 | 2003-2004 | ENF | 5    | 9    | 260   | FLUXNET2015 | MODIS      |
| CA-NS6 | 2002-2004 | OSH | 4    | 6    | 244   | FLUXNET2015 | MODIS      |
| CA-NS7 | 2003-2004 | OSH | 0.25 | 6    | 297   | FLUXNET2015 | MODIS      |
| CA-Qcu | 2002-2006 | ENF | 5.5  | 7    | 392   | LaThuile    | Copernicus |
| CA-Qfo | 2004-2010 | ENF | 14   | 24   | 382   | FLUXNET2015 | Copernicus |
| CA-SF1 | 2004-2006 | ENF | 6    | 12   | 536   | FLUXNET2015 | MODIS      |
| CA-SF2 | 2003-2005 | ENF | 4    | 10   | 520   | FLUXNET2015 | MODIS      |
| CA-SF3 | 2003-2005 | OSH | 1    | 20   | 540   | FLUXNET2015 | Copernicus |
| CH-Cha | 2006-2014 | GRA | 0.5  | 2    | 393   | FLUXNET2015 | Copernicus |
| CH-Dav | 1997-2014 | ENF | 25   | 35   | 1639  | FLUXNET2015 | Copernicus |
| CH-Fru | 2007-2014 | GRA | 0.5  | 2.55 | 982   | FLUXNET2015 | MODIS      |
| CH-Oe1 | 2002-2008 | GRA | 0.5  | 2    | 450   | FLUXNET2015 | MODIS      |
| CN-Cha | 2003-2005 | MF  | 28   | 40   | 754   | FLUXNET2015 | MODIS      |
| CN-Cng | 2008-2009 | GRA | 0.75 | 2    | 138   | FLUXNET2015 | MODIS      |
| CN-Dan | 2004-2005 | GRA | 1    | 2.1  | 4751  | FLUXNET2015 | MODIS      |
| CN-Din | 2003-2005 | EBF | 30   | 27   | 261   | FLUXNET2015 | Copernicus |
| CN-Du2 | 2007-2008 | GRA | 0.5  | 3    | 1331  | FLUXNET2015 | MODIS      |
| CN-HaM | 2002-2003 | GRA | 0.3  | 2.2  | 3975  | FLUXNET2015 | MODIS      |
| CN-Qia | 2003-2005 | ENF | 13   | 39.6 | 64    | FLUXNET2015 | MODIS      |
| CZ-wet | 2007-2014 | WET | 1    | 2.7  | 426   | FLUXNET2015 | MODIS      |
| DE-Bay | 1997-1999 | ENF | 25   | 31   | 781   | LaThuile    | Copernicus |
| DE-Geb | 2001-2014 | CRO | 1    | 6    | 161.5 | FLUXNET2015 | Copernicus |
| DE-Gri | 2004-2014 | GRA | 0.7  | 3    | 385   | FLUXNET2015 | Copernicus |
| DE-Hai | 2000-2012 | DBF | 33   | 43.5 | 430   | FLUXNET2015 | Copernicus |
| DE-Kli | 2005-2014 | CRO | 1.5  | 3.5  | 478   | FLUXNET2015 | Copernicus |
| DE-Meh | 2004-2006 | MF  | 1    | 3    | 291   | LaThuile    | MODIS      |

|        |           |     |      |      |       |             |            |
|--------|-----------|-----|------|------|-------|-------------|------------|
| DE-Obe | 2008-2014 | ENF | 19   | 30   | 734   | FLUXNET2015 | Copernicus |
| DE-Seh | 2008-2010 | CRO | 0.8  | 2    | 103   | FLUXNET2015 | Copernicus |
| DE-SfN | 2013-2014 | WET | 2    | 4.3  | 590   | FLUXNET2015 | Copernicus |
| DE-Tha | 1998-2014 | ENF | 26.5 | 42   | 380   | FLUXNET2015 | Copernicus |
| DE-Wet | 2002-2006 | ENF | 22   | 29.4 | 703   | LaThuile    | MODIS      |
| DK-Fou | 2005      | CRO | 1    | 3.5  | 51    | FLUXNET2015 | MODIS      |
| DK-Lva | 2005-2006 | GRA | 0.5  | 2.5  | -2493 | LaThuile    | Copernicus |
| DK-Ris | 2004-2005 | CRO | 1    | 2    | 24    | LaThuile    | MODIS      |
| DK-Sor | 1997-2014 | DBF | 25   | 57   | 40    | FLUXNET2015 | Copernicus |
| DK-ZaH | 2000-2013 | GRA | 0.5  | 3    | 38    | FLUXNET2015 | MODIS      |
| ES-ES1 | 1999-2006 | ENF | 7.5  | 13   | 1     | LaThuile    | MODIS      |
| ES-ES2 | 2005-2006 | CRO | 0.5  | 1.6  | 7     | LaThuile    | MODIS      |
| ES-LgS | 2007      | OSH | 0.2  | 1.5  | 2267  | FLUXNET2015 | MODIS      |
| ES-LMa | 2004-2006 | SAV | 8    | 15   | 278   | LaThuile    | MODIS      |
| ES-VDA | 2004      | SAV | 0.5  | 1.5  | 1787  | LaThuile    | MODIS      |
| FI-Hyy | 1996-2014 | ENF | 14   | 23   | 181   | FLUXNET2015 | Copernicus |
| FI-Kaa | 2000-2002 | WET | 0.8  | 5    | 159   | LaThuile    | MODIS      |
| FI-Lom | 2007-2009 | WET | 0.4  | 3    | 274   | FLUXNET2015 | MODIS      |
| FI-Sod | 2008-2014 | ENF | 12.7 | 23   | 180   | FLUXNET2015 | Copernicus |
| FR-Fon | 2005-2013 | DBF | 24   | 35   | 103   | FLUXNET2015 | MODIS      |
| FR-Gri | 2005-2013 | CRO | 1    | 3.17 | 125   | FLUXNET2015 | Copernicus |
| FR-Hes | 1997-2006 | DBF | 13   | 18   | 293   | LaThuile    | Copernicus |
| FR-LBr | 2003-2008 | ENF | 20   | 38   | 61    | FLUXNET2015 | MODIS      |
| FR-Lq1 | 2004-2006 | GRA | 0.5  | 2    | 1066  | LaThuile    | MODIS      |
| FR-Lq2 | 2004-2006 | GRA | 0.5  | 2    | 1081  | LaThuile    | MODIS      |
| FR-Pue | 2000-2014 | EBF | 6.5  | 11   | 270   | FLUXNET2015 | MODIS      |
| GF-Guy | 2004-2014 | EBF | 35   | 55   | 48    | FLUXNET2015 | Copernicus |
| HU-Bug | 2003-2006 | GRA | 1    | 4    | 106   | LaThuile    | MODIS      |
| ID-Pag | 2002-2003 | EBF | 26   | 41   | 52    | LaThuile    | Copernicus |
| IE-Ca1 | 2004-2006 | CRO | 0.9  | 1.9  | 72    | LaThuile    | Copernicus |
| IE-Dri | 2003-2005 | GRA | 0.5  | 6    | 186   | LaThuile    | Copernicus |
| IT-Amp | 2003-2006 | GRA | 0.5  | 4    | 991   | LaThuile    | MODIS      |

|        |           |     |      |      |      |             |            |
|--------|-----------|-----|------|------|------|-------------|------------|
| IT-BCi | 2005-2010 | CRO | 1    | 2    | 20   | FLUXNET2015 | Copernicus |
| IT-CA1 | 2012-2013 | DBF | 5.5  | 8    | 200  | FLUXNET2015 | MODIS      |
| IT-CA2 | 2012-2013 | CRO | 0.3  | 3.2  | 200  | FLUXNET2015 | MODIS      |
| IT-CA3 | 2012-2013 | DBF | 3.5  | 7    | 197  | FLUXNET2015 | MODIS      |
| IT-Col | 2007-2014 | DBF | 13   | 25.2 | 1560 | FLUXNET2015 | MODIS      |
| IT-Cpz | 2001-2008 | EBF | 13   | 15   | 68   | FLUXNET2015 | MODIS      |
| IT-Isp | 2013-2014 | DBF | 19   | 38   | 210  | FLUXNET2015 | MODIS      |
| IT-Lav | 2005-2014 | ENF | 28   | 33   | 1353 | FLUXNET2015 | MODIS      |
| IT-LMa | 2003-2004 | DBF | 25   | 28   | 350  | LaThuile    | MODIS      |
| IT-Mal | 2003      | GRA | 0.5  | 3    | 1610 | LaThuile    | MODIS      |
| IT-MBo | 2003-2012 | GRA | 0.3  | 2.5  | 1550 | FLUXNET2015 | MODIS      |
| IT-Noe | 2004-2014 | CSH | 1.2  | 3    | 25   | FLUXNET2015 | MODIS      |
| IT-Non | 2002      | DBF | 7    | 13   | 14   | LaThuile    | MODIS      |
| IT-PT1 | 2003-2004 | DBF | 26   | 30   | 60   | FLUXNET2015 | Copernicus |
| IT-Ren | 2010-2013 | ENF | 28   | 40   | 1730 | FLUXNET2015 | MODIS      |
| IT-Ro1 | 2002-2006 | DBF | 15   | 20   | 235  | FLUXNET2015 | MODIS      |
| IT-Ro2 | 2002-2008 | DBF | 15   | 20   | 160  | FLUXNET2015 | MODIS      |
| IT-SR2 | 2013-2014 | ENF | 19   | 23.5 | 4    | FLUXNET2015 | MODIS      |
| IT-SRo | 2003-2012 | ENF | 16   | 23.5 | 6    | FLUXNET2015 | MODIS      |
| JP-SMF | 2003-2006 | MF  | 8.1  | 19   | 199  | FLUXNET2015 | MODIS      |
| NL-Ca1 | 2003-2006 | GRA | 0.5  | 3    | 1    | LaThuile    | MODIS      |
| NL-Hor | 2008-2011 | GRA | 1    | 4.7  | 2.2  | FLUXNET2015 | MODIS      |
| NL-Loo | 1997-2013 | ENF | 15.5 | 27   | 25   | FLUXNET2015 | Copernicus |
| PL-wet | 2004-2005 | WET | 1    | 2.5  | 55   | LaThuile    | MODIS      |
| PT-Esp | 2002-2004 | EBF | 20   | 33   | 90   | LaThuile    | MODIS      |
| PT-Mi1 | 2005      | EBF | 7.3  | 29   | 230  | LaThuile    | MODIS      |
| PT-Mi2 | 2005-2006 | GRA | 0.1  | 2.5  | 193  | LaThuile    | MODIS      |
| RU-Che | 2003-2004 | WET | 0.4  | 5.3  | 6    | FLUXNET2015 | MODIS      |
| RU-Fyo | 2003-2014 | ENF | 21   | 48   | 265  | FLUXNET2015 | MODIS      |
| RU-Zot | 2003      | WSA | 12   | 30   | 124  | LaThuile    | Copernicus |
| SD-Dem | 2005-2009 | SAV | 1.5  | 2.5  | 500  | FLUXNET2015 | MODIS      |
| SE-Deg | 2002-2005 | WET | 0.5  | 1.8  | 242  | LaThuile    | Copernicus |

|        |           |     |     |      |      |             |            |
|--------|-----------|-----|-----|------|------|-------------|------------|
| UK-Gri | 2000-2001 | ENF | 10  | 15.4 | 343  | LaThuile    | MODIS      |
| UK-Ham | 2004      | DBF | 22  | 28   | 76   | LaThuile    | MODIS      |
| UK-PL3 | 2005-2006 | MF  | 22  | 30.5 | 104  | LaThuile    | MODIS      |
| US-AR1 | 2010-2012 | GRA | 1   | 2.84 | 611  | FLUXNET2015 | Copernicus |
| US-AR2 | 2010-2011 | GRA | 1   | 2.95 | 646  | FLUXNET2015 | Copernicus |
| US-ARM | 2003-2012 | CRO | 0.5 | 60   | 314  | FLUXNET2015 | Copernicus |
| US-Aud | 2003-2005 | GRA | 0.5 | 4    | 1466 | LaThuile    | MODIS      |
| US-Bar | 2005      | MF  | 21  | 26.5 | 270  | LaThuile    | MODIS      |
| US-Bkg | 2005-2006 | GRA | 1   | 4    | 495  | LaThuile    | MODIS      |
| US-Blo | 2000-2006 | ENF | 4.7 | 12.5 | 1315 | FLUXNET2015 | Copernicus |
| US-Bo1 | 1997-2006 | CRO | 3   | 10   | 217  | LaThuile    | MODIS      |
| US-Cop | 2002-2003 | GRA | 0.5 | 1.85 | 1520 | FLUXNET2015 | Copernicus |
| US-FPe | 2000-2006 | GRA | 0.3 | 3.5  | 638  | LaThuile    | MODIS      |
| US-GLE | 2009-2014 | ENF | 10  | 23   | 3197 | FLUXNET2015 | Copernicus |
| US-Goo | 2004-2006 | GRA | 0.3 | 4    | 87   | LaThuile    | MODIS      |
| US-Ha1 | 1992-2012 | DBF | 25  | 30   | 340  | FLUXNET2015 | MODIS      |
| US-Ho1 | 1996-2004 | ENF | 20  | 29   | 72   | LaThuile    | MODIS      |
| US-KS2 | 2003-2006 | CSH | 2   | 3.5  | 3    | FLUXNET2015 | MODIS      |
| US-Los | 2000-2008 | WET | 2   | 10.2 | 480  | FLUXNET2015 | MODIS      |
| US-Me2 | 2002-2014 | ENF | 16  | 29   | 1253 | FLUXNET2015 | Copernicus |
| US-Me4 | 1996-2000 | ENF | 20  | 47   | 922  | LaThuile    | MODIS      |
| US-Me6 | 2011-2014 | ENF | 5.2 | 14   | 998  | FLUXNET2015 | MODIS      |
| US-MMS | 1999-2014 | DBF | 27  | 48   | 275  | FLUXNET2015 | MODIS      |
| US-MOz | 2005-2006 | DBF | 24  | 30   | 212  | LaThuile    | MODIS      |
| US-Myb | 2011-2014 | WET | 1   | 3.3  | -1   | FLUXNET2015 | MODIS      |
| US-Ne1 | 2002-2012 | CRO | 3   | 6    | 361  | FLUXNET2015 | MODIS      |
| US-Ne2 | 2002-2012 | CRO | 2.5 | 6    | 362  | FLUXNET2015 | MODIS      |
| US-Ne3 | 2002-2012 | CRO | 2.5 | 6    | 363  | FLUXNET2015 | MODIS      |
| US-NR1 | 1999-2014 | ENF | 12  | 26   | 3050 | FLUXNET2015 | MODIS      |
| US-PFa | 1995-2014 | MF  | 30  | 122  | 470  | FLUXNET2015 | MODIS      |
| US-Prr | 2011-2013 | ENF | 7   | 16   | 210  | FLUXNET2015 | MODIS      |
| US-SP1 | 2005      | ENF | 22  | 30   | 47   | LaThuile    | Copernicus |

|        |           |     |      |      |      |             |            |
|--------|-----------|-----|------|------|------|-------------|------------|
| US-SP2 | 2000-2004 | ENF | 1    | 7    | 46   | LaThuile    | Copernicus |
| US-SP3 | 1999-2004 | EBF | 10   | 15   | 36   | LaThuile    | Copernicus |
| US-SRG | 2009-2014 | GRA | 1    | 3.25 | 1291 | FLUXNET2015 | MODIS      |
| US-SRM | 2004-2014 | WSA | 2.5  | 6.4  | 1120 | FLUXNET2015 | MODIS      |
| US-Syv | 2002-2008 | MF  | 27   | 36   | 540  | FLUXNET2015 | MODIS      |
| US-Ton | 2001-2014 | WSA | 7.1  | 23   | 177  | FLUXNET2015 | MODIS      |
| US-Tw4 | 2014      | Wet | 0.5  | 3    | -5   | FLUXNET2015 | Copernicus |
| US-Twt | 2010-2014 | CRO | 0.5  | 3.25 | -7   | FLUXNET2015 | Copernicus |
| US-UMB | 2000-2014 | DBF | 20   | 50   | 234  | FLUXNET2015 | MODIS      |
| US-Var | 2001-2014 | GRA | 0.55 | 3    | 129  | FLUXNET2015 | MODIS      |
| US-WCr | 1999-2006 | DBF | 24   | 30   | 520  | FLUXNET2015 | Copernicus |
| US-Whs | 2008-2014 | OSH | 0.5  | 4    | 1370 | FLUXNET2015 | MODIS      |
| US-Wkg | 2005-2014 | GRA | 1    | 6.4  | 1531 | FLUXNET2015 | MODIS      |
| ZA-Kru | 2000-2002 | SAV | 12   | 16   | 359  | FLUXNET2015 | MODIS      |
| ZM-Mon | 2008      | DBF | 12   | 33   | 1053 | FLUXNET2015 | MODIS      |

**Table S3: Participating models.** Land surface models that are developed as part of a coupled modelling system are denoted as ‘climate’ or ‘weather’ in their Notes, depending on their default application being climate projection or weather forecasting, despite simulations in this experiment being uncoupled/offline. In each case, leaf area index (LAI) is either prescribed, computed by the model itself, or not used (NA).

| Model                       | Institution                   | LAI        | Notes                                                                                                                                                    | Authors          | References                                                                                      |
|-----------------------------|-------------------------------|------------|----------------------------------------------------------------------------------------------------------------------------------------------------------|------------------|-------------------------------------------------------------------------------------------------|
| BEPS                        | LBL, USA                      | Prescribed | Ecosystem model; v4.01 ( <a href="https://github.com/JChen-UToronto/BEPS_hourly_site_4.02">https://github.com/JChen-UToronto/BEPS_hourly_site_4.02</a> ) | XL               | Liu et al. (1997)                                                                               |
| CABLE                       | UNSW Sydney / CLEX, Australia | Prescribed | Land surface model, climate; r8002; biophysics only, no C-N-P.                                                                                           | MdK, AU          | Kowalczyk et al. (2006); Wang et al. (2011)                                                     |
| CABLE-POP                   | UWS / CSIRO, Australia        | Prescribed | Land surface model, offline only. C-N cycle included.                                                                                                    | JK               | Haverd et al. (2013; 2016; 2018)                                                                |
| CHTESSEL (currently ECLand) | ECMWF, UK                     | Prescribed | Land surface model, weather. 3 simulation sets, forced locally and with ERA5.                                                                            | DF, SB, GB       | van den Hurk et al. (2000); Balsamo et al. (2009); Dutra et al. (2010); Boussetta et al. (2013) |
| CLM                         | NCAR, USA                     | Prescribed | Land surface model, climate; v5.0.34                                                                                                                     | KO, DL           | Lawrence et al. (2019)                                                                          |
| ORCHIDEE2                   | LSCE/IPSL                     | Computed   | Land surface model, climate and CO <sub>2</sub> forcing. Model version used in CMIP6 (no C-N)                                                            | XW-F, CO, PP, NV | Krinner et al. (2005),                                                                          |



|                     |                                                                     |            |                                                                                                                                                                                                                                                                                                                    |                 |                                                                       |
|---------------------|---------------------------------------------------------------------|------------|--------------------------------------------------------------------------------------------------------------------------------------------------------------------------------------------------------------------------------------------------------------------------------------------------------------------|-----------------|-----------------------------------------------------------------------|
| ORCHIDEE3           | LSCE/IPSL                                                           | Computed   | Model version based on ORC2 but with Nitrogen cycle and C-N interactions                                                                                                                                                                                                                                           | XW-F, CO,PP, NV | Vuichard et al.,(2019)                                                |
| JULES               | Met Office, UK                                                      | Prescribed | Land surface model, weather and climate.                                                                                                                                                                                                                                                                           | HR, MB          | Best et al. (2011); Clark et al. (2011)                               |
| Manabe bucket       | Met Office, UK                                                      | NA         | Mechanistic benchmark                                                                                                                                                                                                                                                                                              | MB              | Manabe (1969)                                                         |
| Penman Monteith PET | Met Office, UK                                                      | NA         | Mechanistic benchmark; estimate of potential evapotranspiration (PET)                                                                                                                                                                                                                                              | MB              | Monteith & Unsworth (1990)                                            |
| GFDL                | NOAA GFDL, USA                                                      | Computed   | Land surface model, climate                                                                                                                                                                                                                                                                                        | SM              | Dunne et al. (2020); Shevliakova et al. (2023)                        |
| MATSIRO             | U Tokyo, Japan                                                      | Prescribed | Land surface model, climate                                                                                                                                                                                                                                                                                        | TN, HK          | MATSIRO6 Document Writing Team (2021)                                 |
| STEMMUS - SCOPE     | U Twente, Netherlands / Northwest Agriculture and Forestry U, China | Prescribed | Land surface model, offline only; R1.3.0 ( <a href="https://github.com/EcoExtreML/STEMMUS_SCOPE">https://github.com/EcoExtreML/STEMMUS_SCOPE</a> )                                                                                                                                                                 | YZ, YW, BS      | Wang et al. (2021)                                                    |
| EntTBM              | Yonsei U, Korea                                                     | Prescribed | Ecosystem model within the Earth System Modeling Framework (ESMF), coupled to the NASA Goddard Institute for Space Studies (GISS) GCM ModelE                                                                                                                                                                       | YK, KC          | Kim et al. (2015)                                                     |
| SDGVM               | ORNL, USA / University of Sheffield, UK                             | Computed   | Ecosystem model; carbon cycle model ( <a href="https://bitbucket.org/walkeranthony/sdgvm/">https://bitbucket.org/walkeranthony/sdgvm/</a> )                                                                                                                                                                        | AW              | Woodward et al. (1995); Woodward & Lomas (2004); Walker et al. (2017) |
| LPJ-GUESS           | KIT, Germany                                                        | Computed   | Ecosystem model; v4.0, Lund svn branch plumber, r8913; Qle is based on estimated evaporative demand and modelled soil water supply; Qh estimated from Rnet minus Qle (Note: LWnet component of Rnet and hence Qh during polar night at high latitude (lat > 64) sites is erroneous).                               | PA              | Smith et al. (2014)                                                   |
| MuSICA              | INRAE, France                                                       | Prescribed | Ecosystem model; Revision 710844c, veg params from Cable-POP, soil texture from soilgrids.org and soil hydraulic params from Montzka et al. (ESSD 2017)                                                                                                                                                            | MC, JO          | Ogée et al. (2003); Gennaretti et al. (2020)                          |
| QUINCY              | MPI BGC                                                             | Computed   | Ecosystem model;                                                                                                                                                                                                                                                                                                   | SC, SZ          | Thum et al. (2019)                                                    |
| Noah-MP             | NASA, U-Albany                                                      | Computed   | V4.0.1; land surface model included in U.S. National Water Model and U.S. Unified Forecast System; run in NASA-LIS v7.2r (Kumar et al., 2006) ISRIC SoilGrids v2017 250m soil texture (Hengl et al. 2017); Vegetation fraction prescribed as annual maximum of NOAA-NCEP 1985-1989 AVHRR-based monthly climatology | CF              | Niu et al. (2011); He et al. (2023)                                   |
| Empirical: LSTM     | University of Alabama                                               | Prescribed | Empirical benchmark; three sites out-of-sample at a time. Two versions created - one to predict raw fluxes and on to predict energy-balance corrected fluxes                                                                                                                                                       | CB, JF, GN      |                                                                       |

|                                          |                                       |            |                                                                                                                                                                             |         |                                              |
|------------------------------------------|---------------------------------------|------------|-----------------------------------------------------------------------------------------------------------------------------------------------------------------------------|---------|----------------------------------------------|
| Empirical:<br>RF                         | UNSW<br>Sydney /<br>CLEX<br>Australia | Prescribed | Empirical benchmark; one site out-of-sample at a time. Two versions created - one to predict raw fluxes and on to predict energy-balance corrected fluxes.                  | SH, GA  |                                              |
| Empirical:<br>clustering &<br>regression | UNSW<br>Sydney /<br>CLEX<br>Australia | NA         | Empirical benchmark; one site out-of-sample at a time. Two versions created of 1lin and 3km27 - one to predict raw fluxes and on to predict energy-balance corrected fluxes | JCP, GA | Abramowitz (2012),<br>Haughton et al. (2018) |

**Table S4: The independent set of metrics used to assess aggregate performance. Metrics are calculated on all time steps ( $i=1, \dots, n$ ) of observations (O) and each model (M) separately for each site.  $B$  is the number of bins used for density estimation, in this case 2048.**

|                                   |                                                                                                                                                                                               |
|-----------------------------------|-----------------------------------------------------------------------------------------------------------------------------------------------------------------------------------------------|
| Mean Bias Error (MBE)             | $\frac{\sum_{i=1}^n (M_i - O_i)}{n}$                                                                                                                                                          |
| Standard Deviation (SD)           | $\left  1 - \sqrt{\frac{\frac{\sum_{i=1}^n (M_i - M)^2}{n-1}}{\frac{\sum_{i=1}^n (O_i - O)^2}{n-1}}} \right $                                                                                 |
| Correlation Coefficient (r)       | $1 - \left[ \frac{n \sum_{i=1}^n (O_i M_i) - (\sum_{i=1}^n O_i \sum_{i=1}^n M_i)}{\sqrt{(n \sum_{i=1}^n O_i^2 - (\sum_{i=1}^n O_i)^2)(n \sum_{i=1}^n M_i^2 - (\sum_{i=1}^n M_i)^2)}} \right]$ |
| Normalised Mean Error (NME)       | $\frac{\sum_{i=1}^n  M_i - O_i }{\sum_{i=1}^n  \bar{O}_i - O_i }$                                                                                                                             |
| 5th percentile difference (5th)   | $ M_5 - O_5 $                                                                                                                                                                                 |
| 95th percentile difference (95th) | $ M_{95} - O_{95} $                                                                                                                                                                           |
| Density overlap percentage (PDF)  | $100 - \left[ \frac{\text{range}(M, O)}{B} \cdot (\sum_{b=1}^B \min(M_b, O_b)) \cdot 100 \right]$                                                                                             |

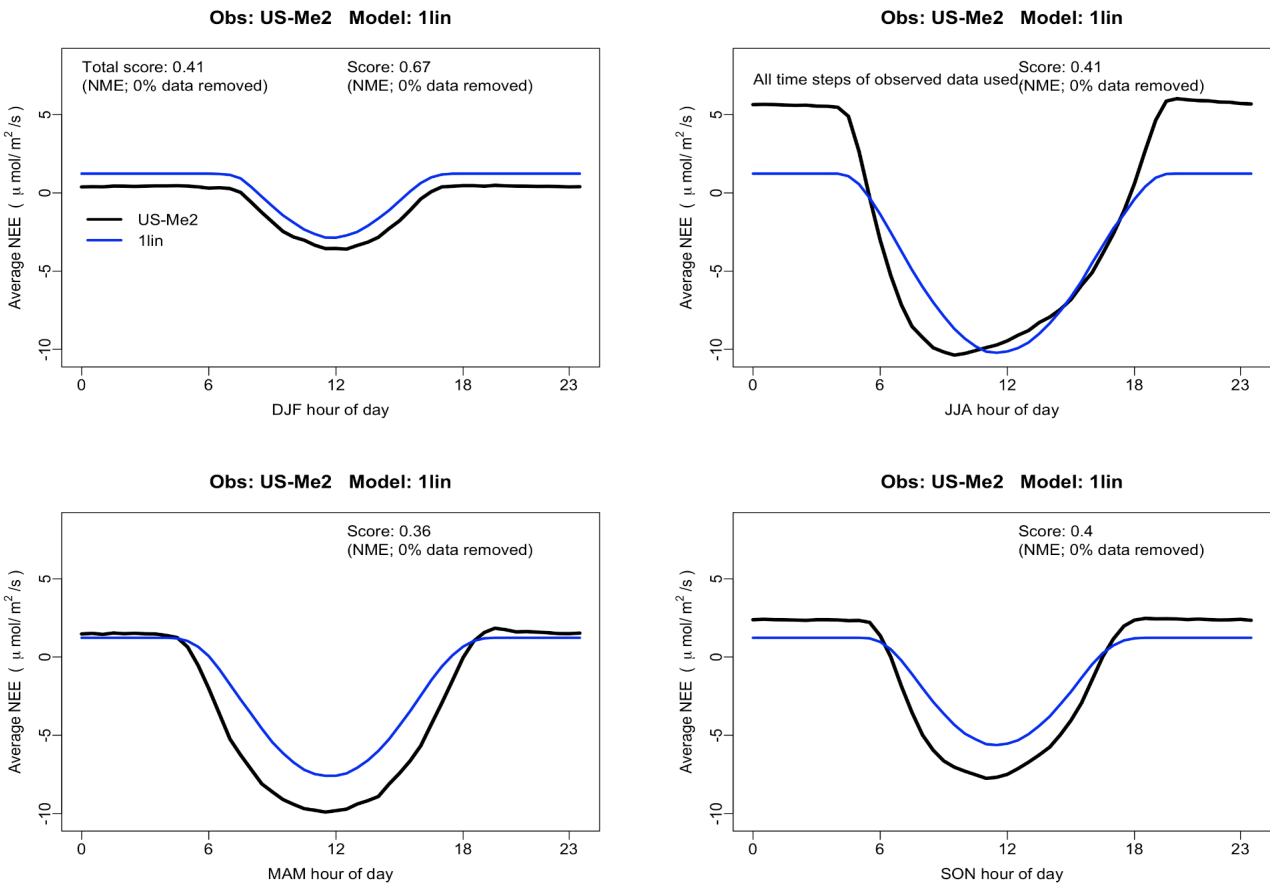

**Figure S4: Performance of the 1lin model for the diurnal cycle of Net Ecosystem Exchange of CO<sub>2</sub> (NEE) at the US-Me2 site, with separate panels for each season. This model is an instantaneous linear response to half-hourly SWdown, and no data from this site was used in the training of the regression.**

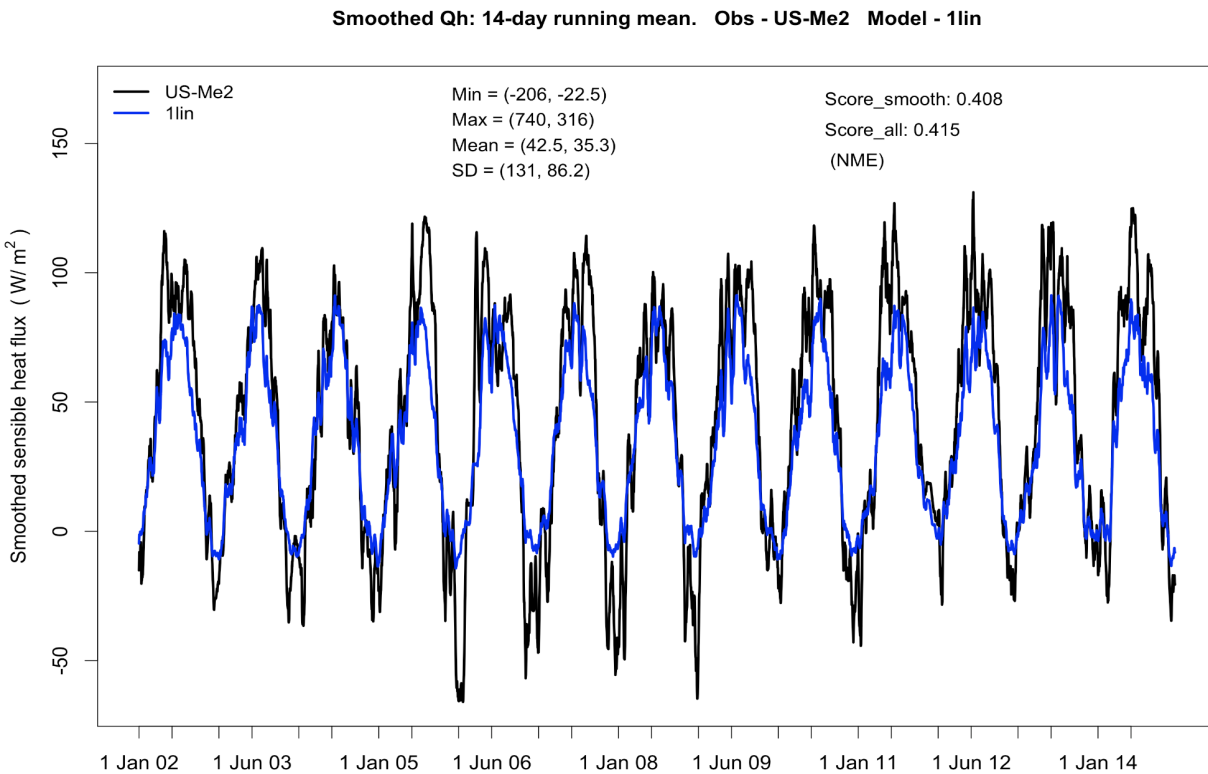

**Figure S5: Performance of the 1lin model for a smoothed time series of sensible heat flux (Qh) at the US-Me2 site. This model is an instantaneous linear response to half-hourly SWdown, and no data from this site was used in the training of the regression.**

Average monthly Qle: Obs - US-Me2 Model - 1lin

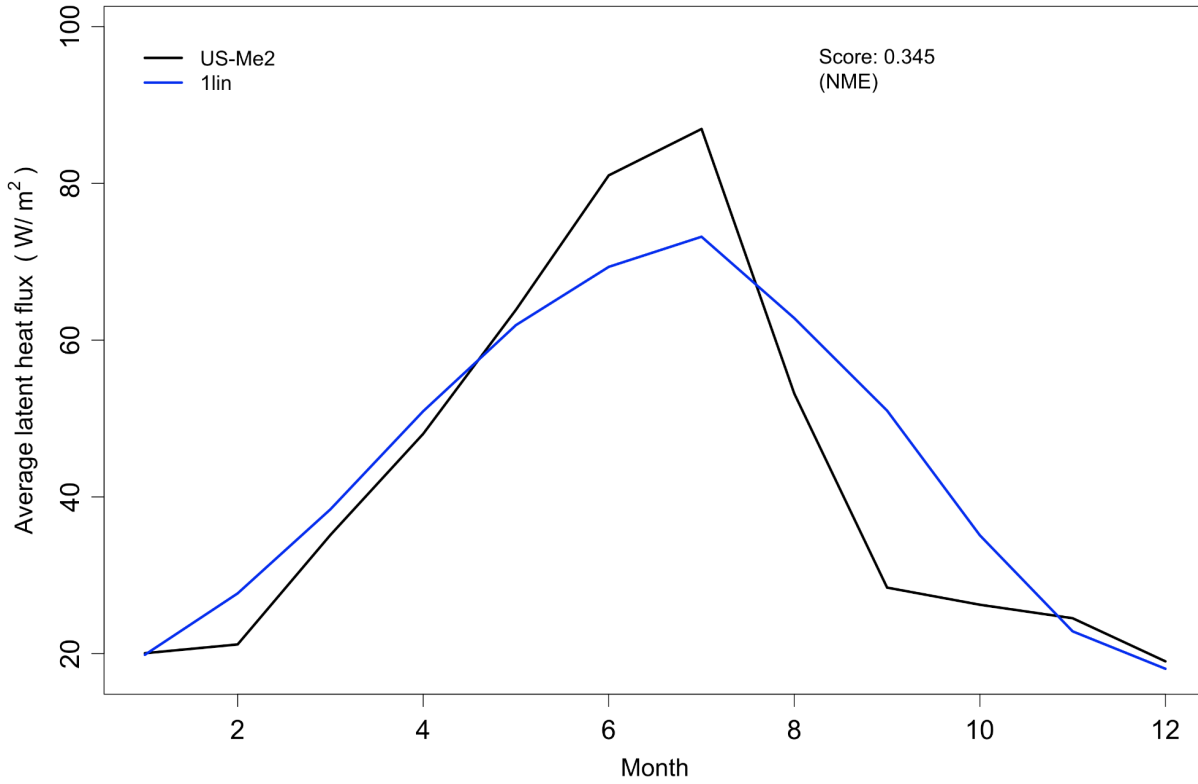

**Figure S6: Performance of the 1lin model for average annual cycle of latent heat flux (Qle) at the US-Me2 site. This model is an instantaneous linear response to half-hourly SWdown, and no data from this site was used in the training of the regression.**

Average Qle\_cor vs Qh\_cor over all sites

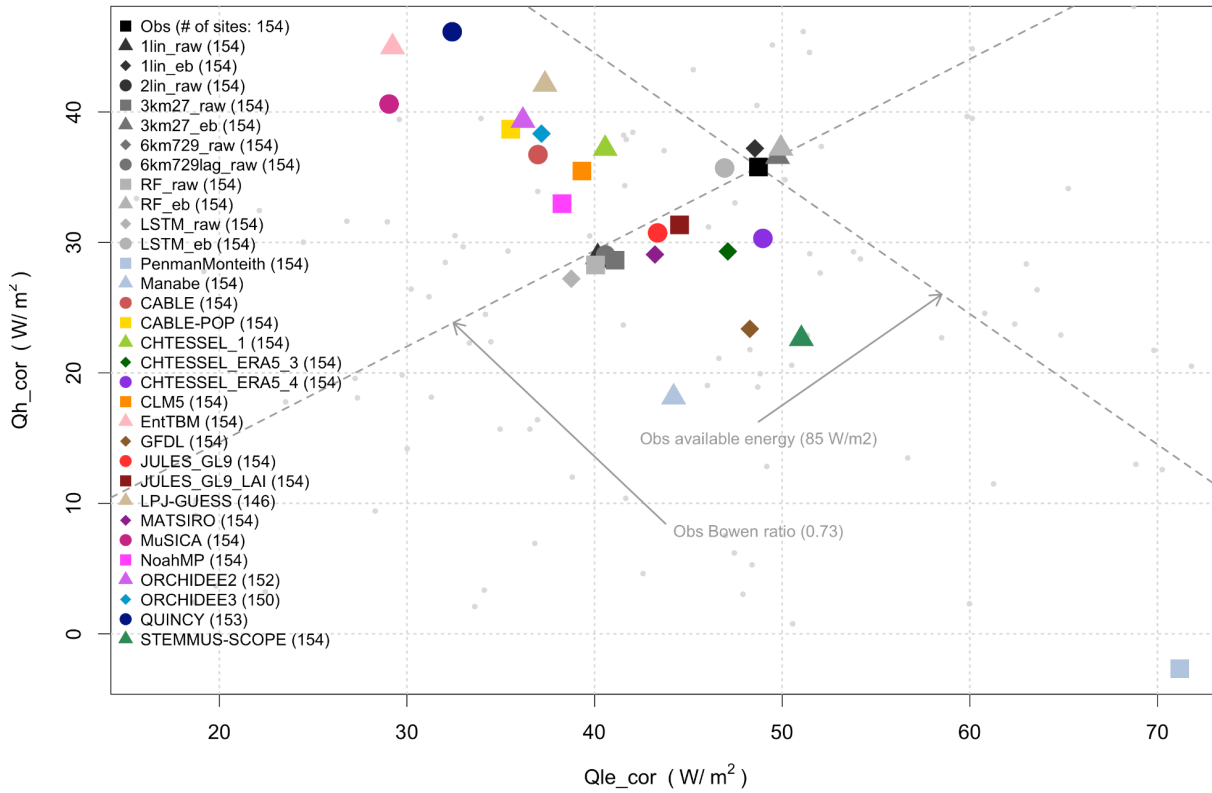

Figure S7a: Same as Fig. 1, but showing observational crosshair location using energy-balance corrected Qle and Qh using the Fluxnet2015 correction algorithm.

Average Qle vs Qh over all sites

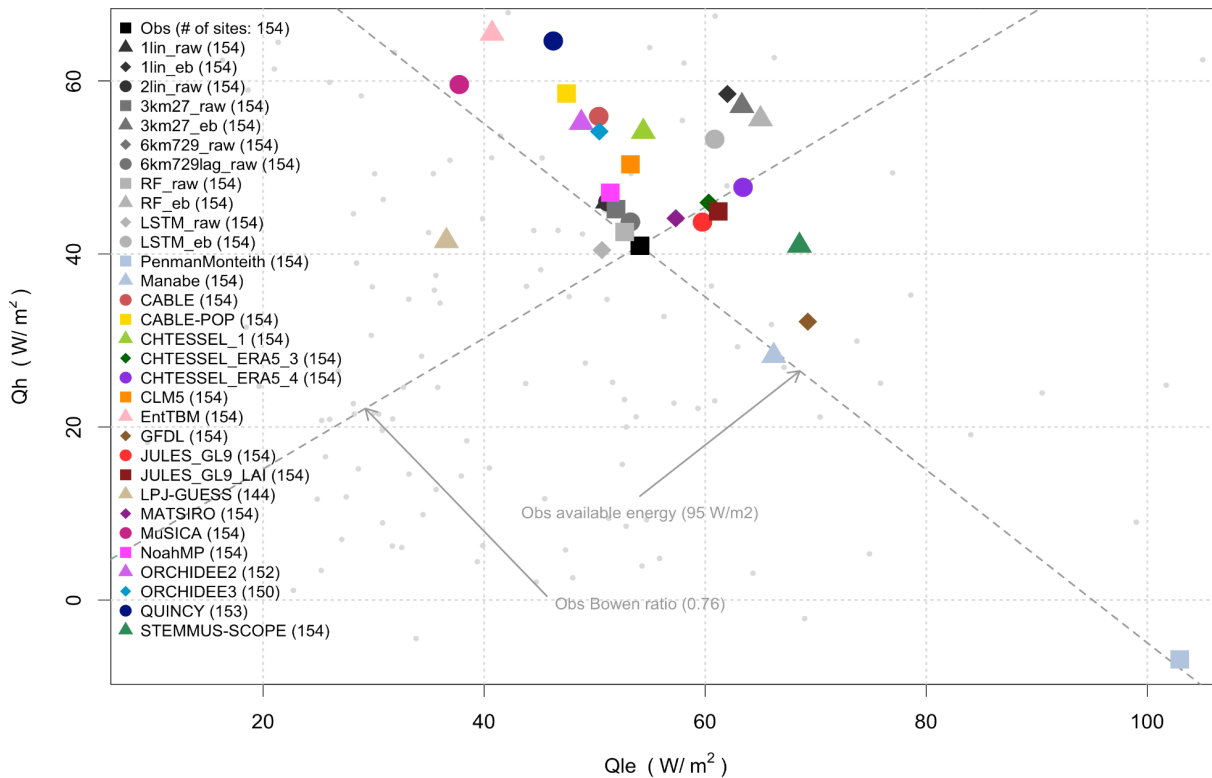

Figure S7b: Same as Fig. 1, using raw fluxes, but showing results filtered for only those time steps with wind speed  $> 2\text{ms}^{-1}$ , typically daytime flux values. This clearly results in a higher average available energy, and slight increase in observed Bowen ratio.

**Error in mean water evaporative fraction [Qle/Rainf] over sites**

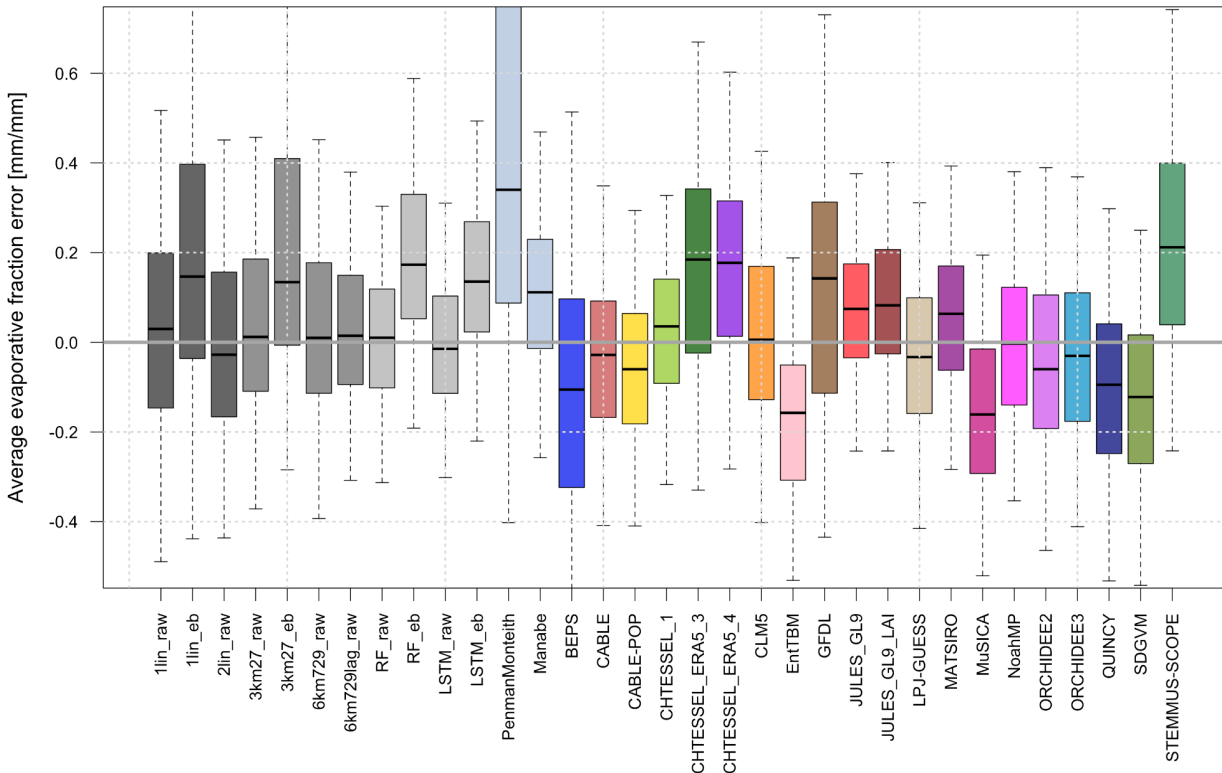

**Figure S8a: Mean error in water evaporative fraction ( $Q_e / \text{Rain}_f$ ), shown as a boxplot across the 154 sites, for each model, using raw flux tower version of  $Q_e$ .**

**Error in mean water evaporative fraction [Qle/Rainf] over sites**

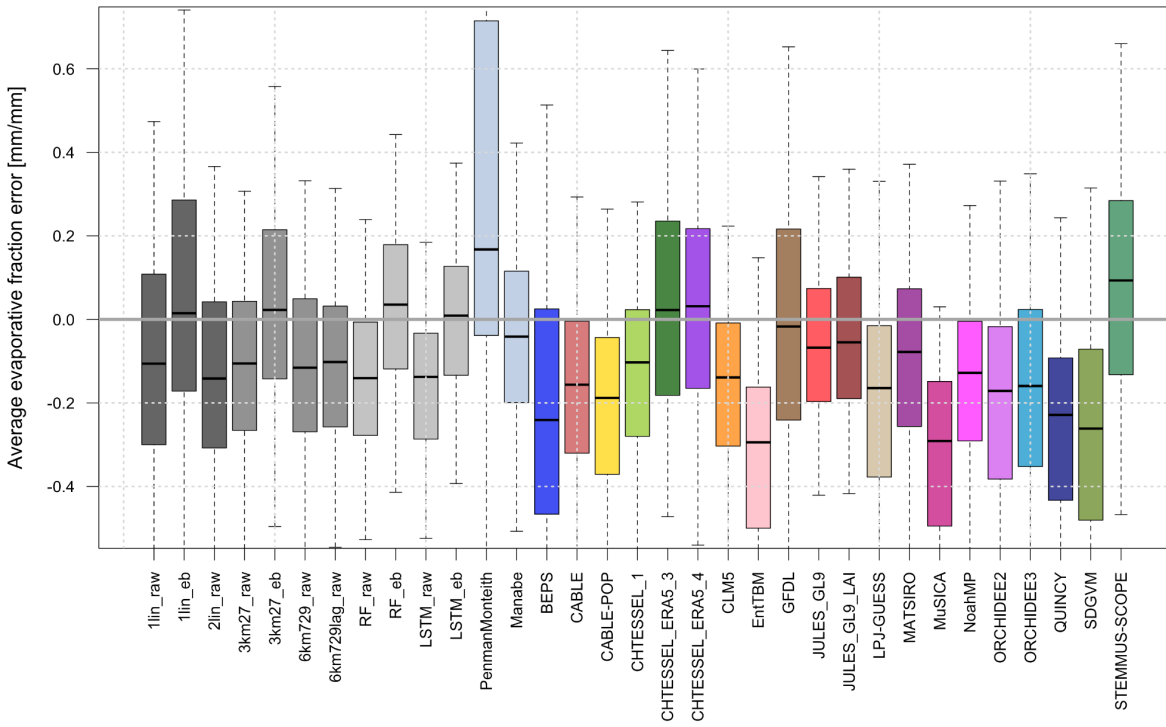

**Figure S8b: Mean error in water evaporative fraction ( $Q_e / \text{Rain}_f$ ), shown as a boxplot across the 154 sites, for each model, using energy-balance corrected version of  $Q_e$ .**

**Error in mean water use efficiency over sites [-NEE/Qle]**

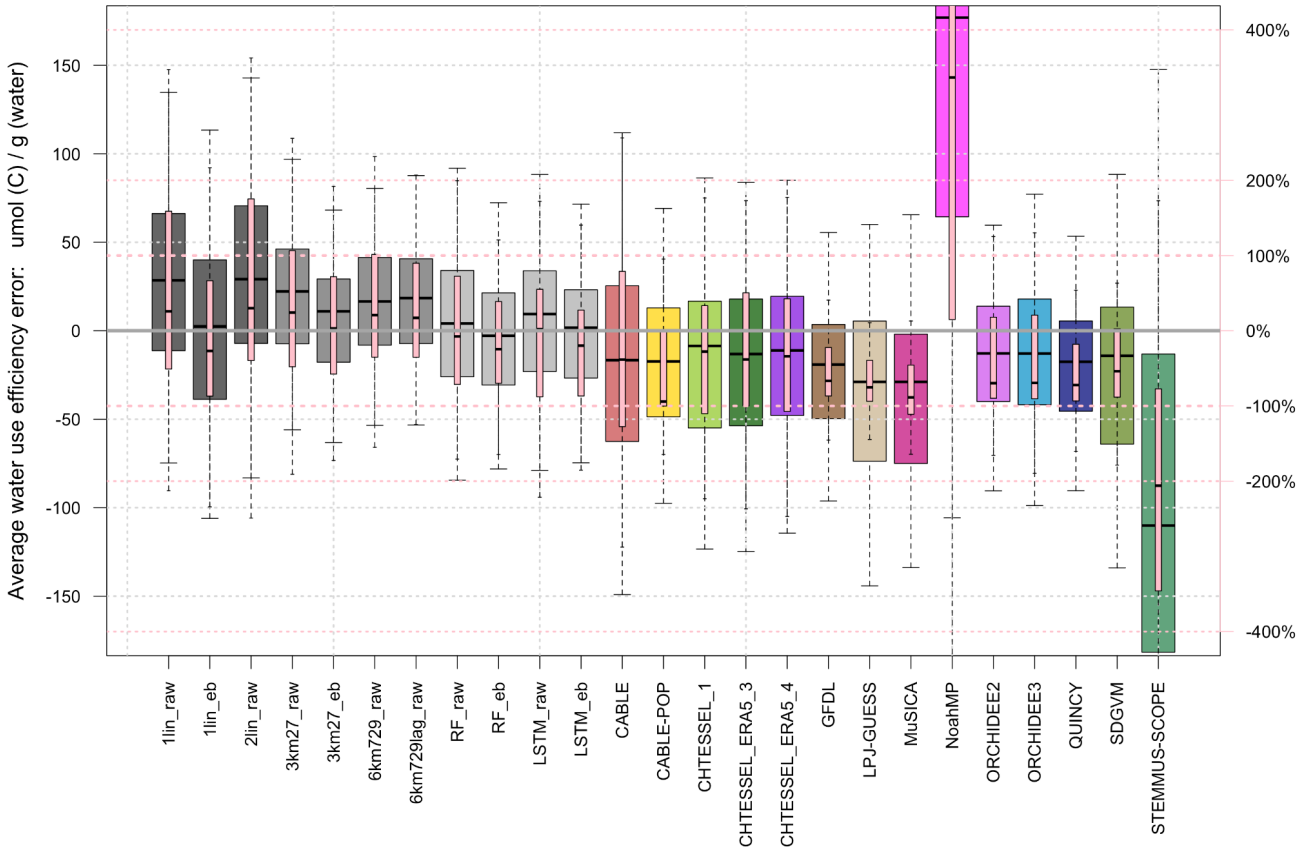

**Figure S9: The equivalent of Figure 4, but using the energy balance corrected version of Qle.**

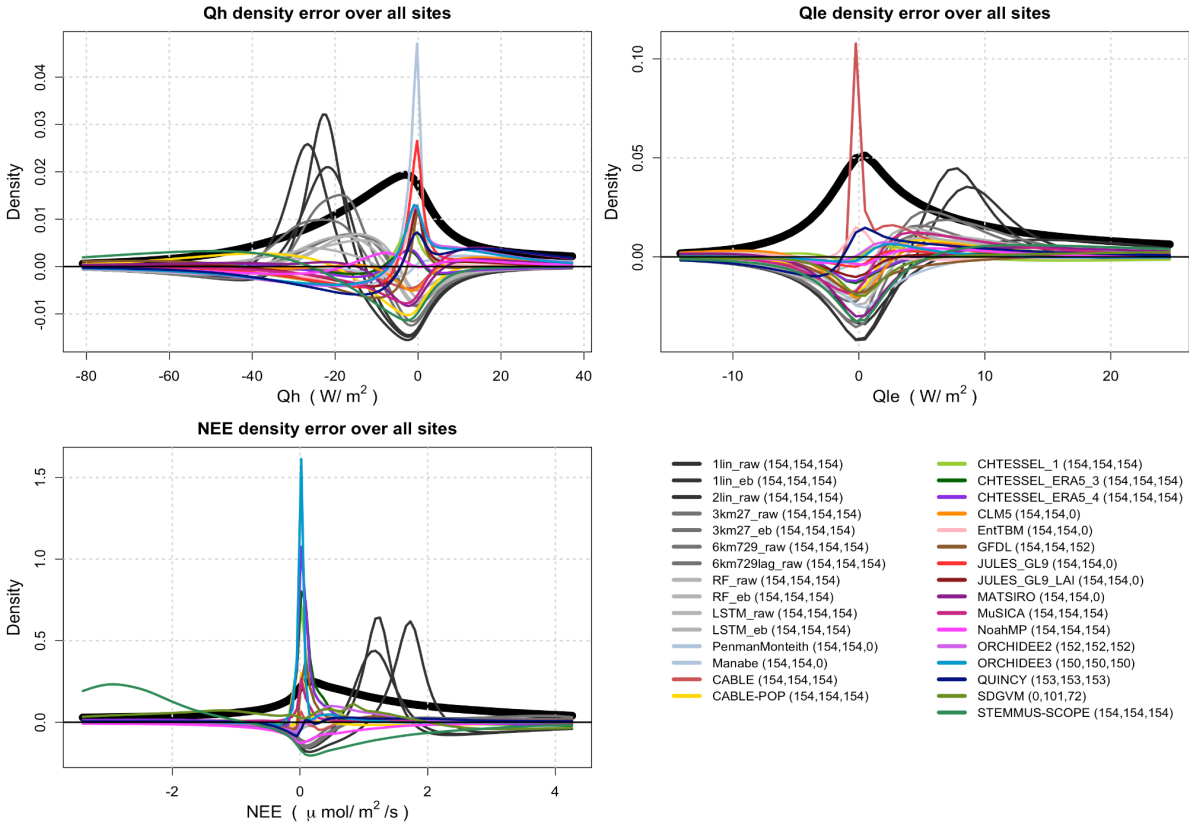

**Figure S10a: Error in the density of values of Qle, Qh and NEE relative to observations collated across all sites. The thick black lines show the density of observed values of each variable, and the thinner lines show the modelled density estimate minus the observed density estimate, and so show which magnitudes of fluxes are simulated too often (positive) or not often enough (negative). The vertical axis is the same for both observed density and LM density error. Horizontal axes are restricted to the region of highest density difference.**

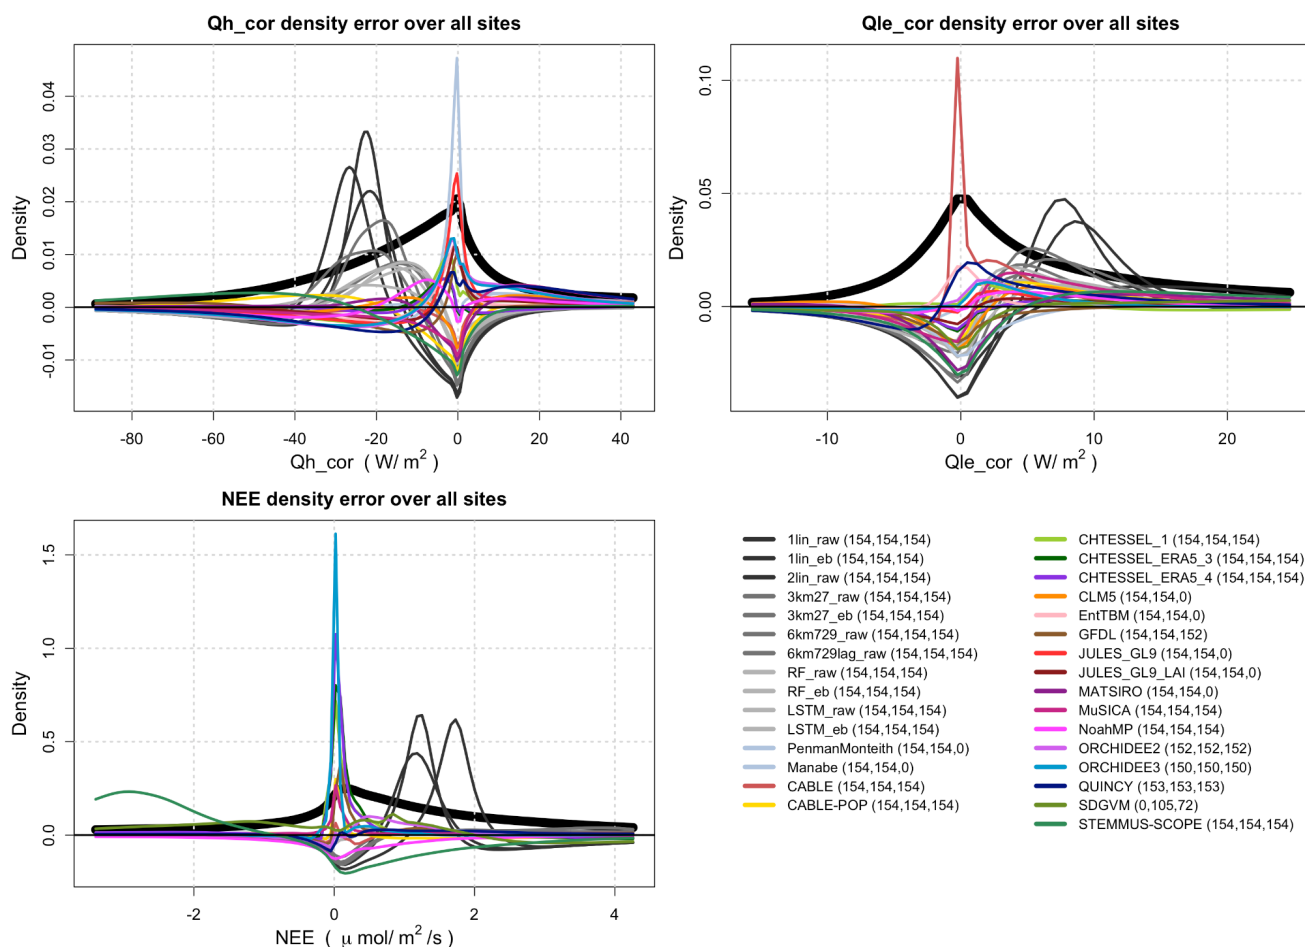

**Figure S10b: Same as Figure 4, but using energy balance corrected Qle and Qh fluxes - note that the changes from Figure S10a are remarkably small.**



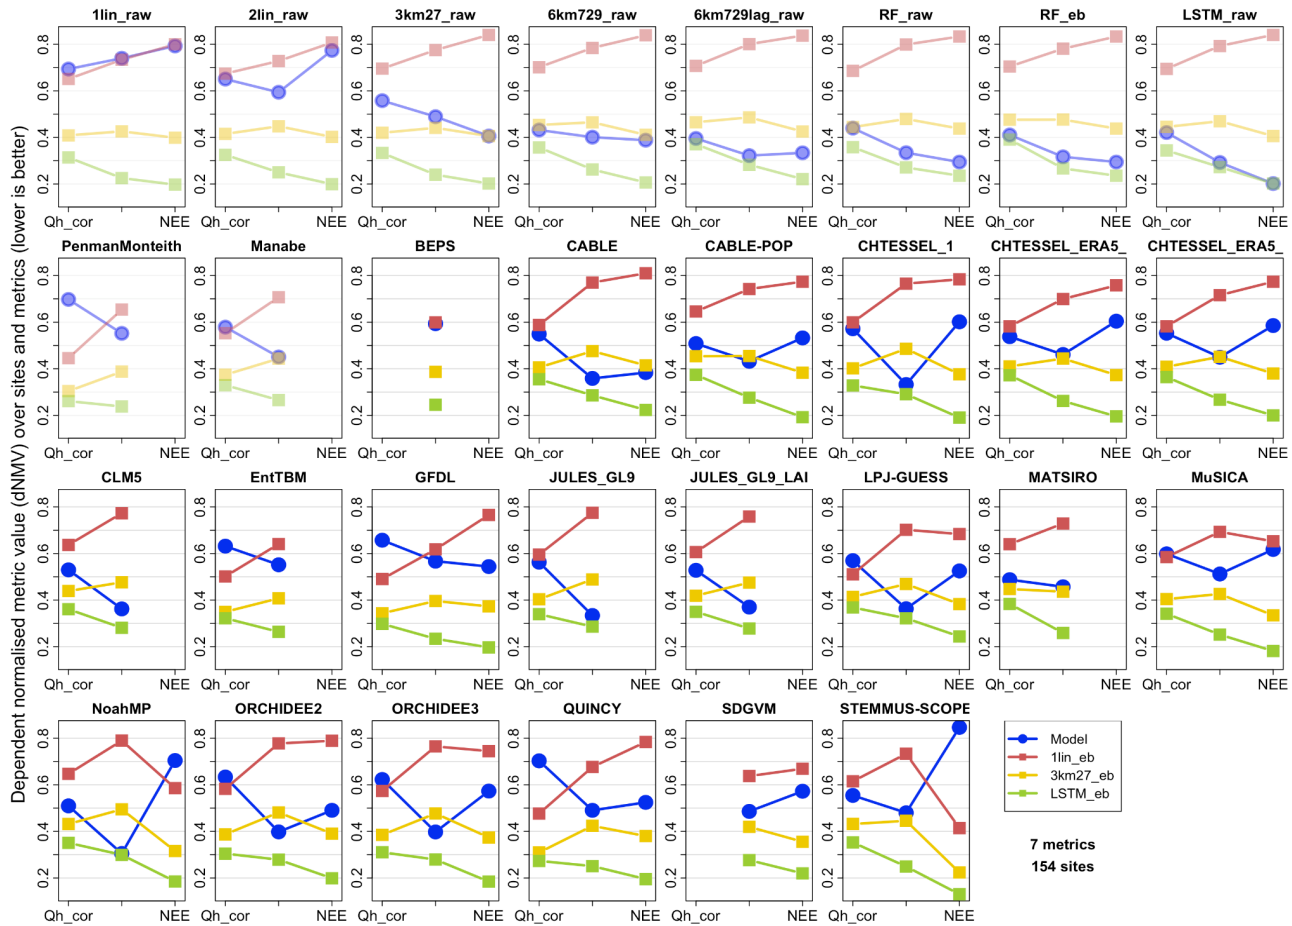

Figure S11a: Same as Fig. 5, showing dNMV, but using the energy-balance corrected observed fluxes for Qle and Qh. Note that the empirical benchmarks used here are those trained to target energy balance corrected fluxes (1lin\_eb, 3km27\_eb and LSTM\_eb).

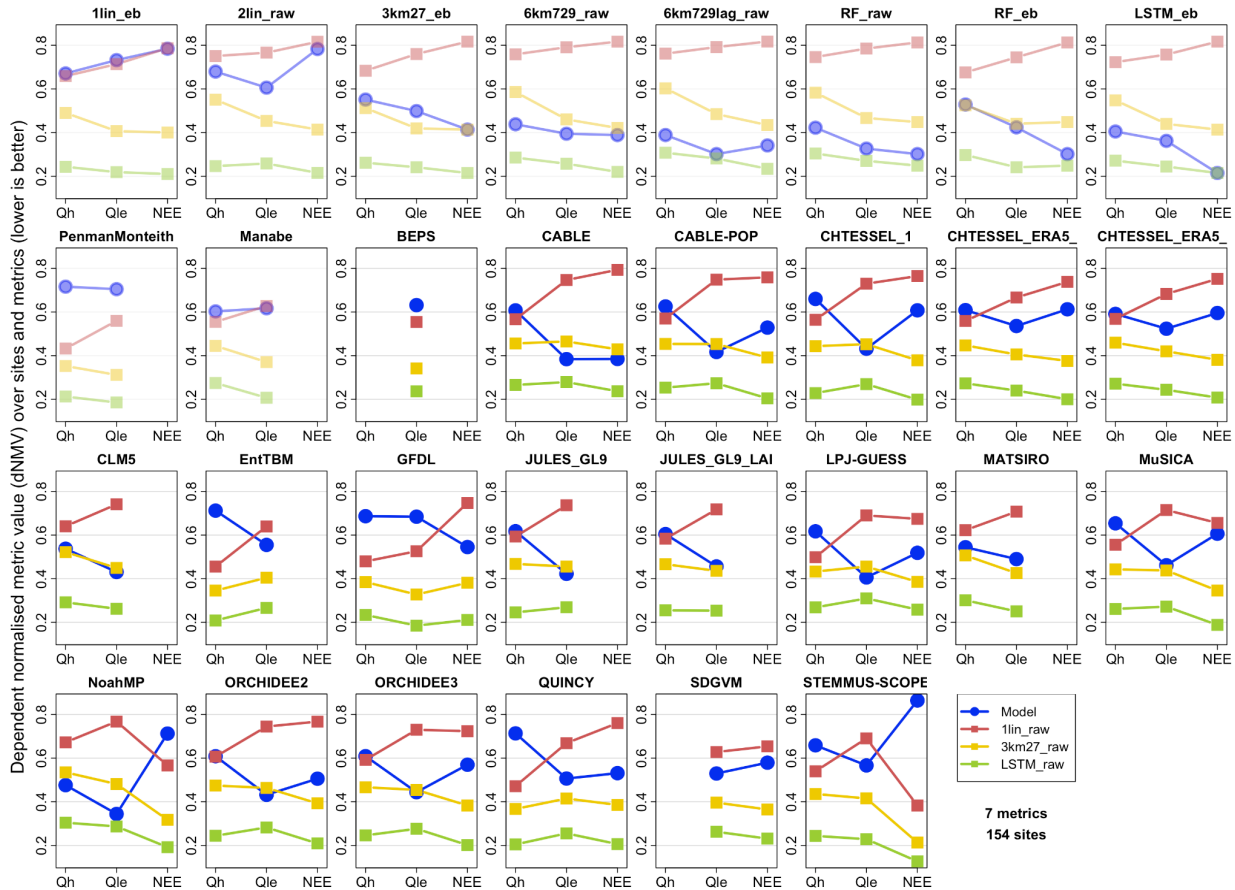

Figure S11b: Same as Figure 5, showing dNMV, using raw fluxes, but showing results filtered for only those time steps with wind speed  $> 2\text{ms}^{-1}$ , typically daytime flux values.

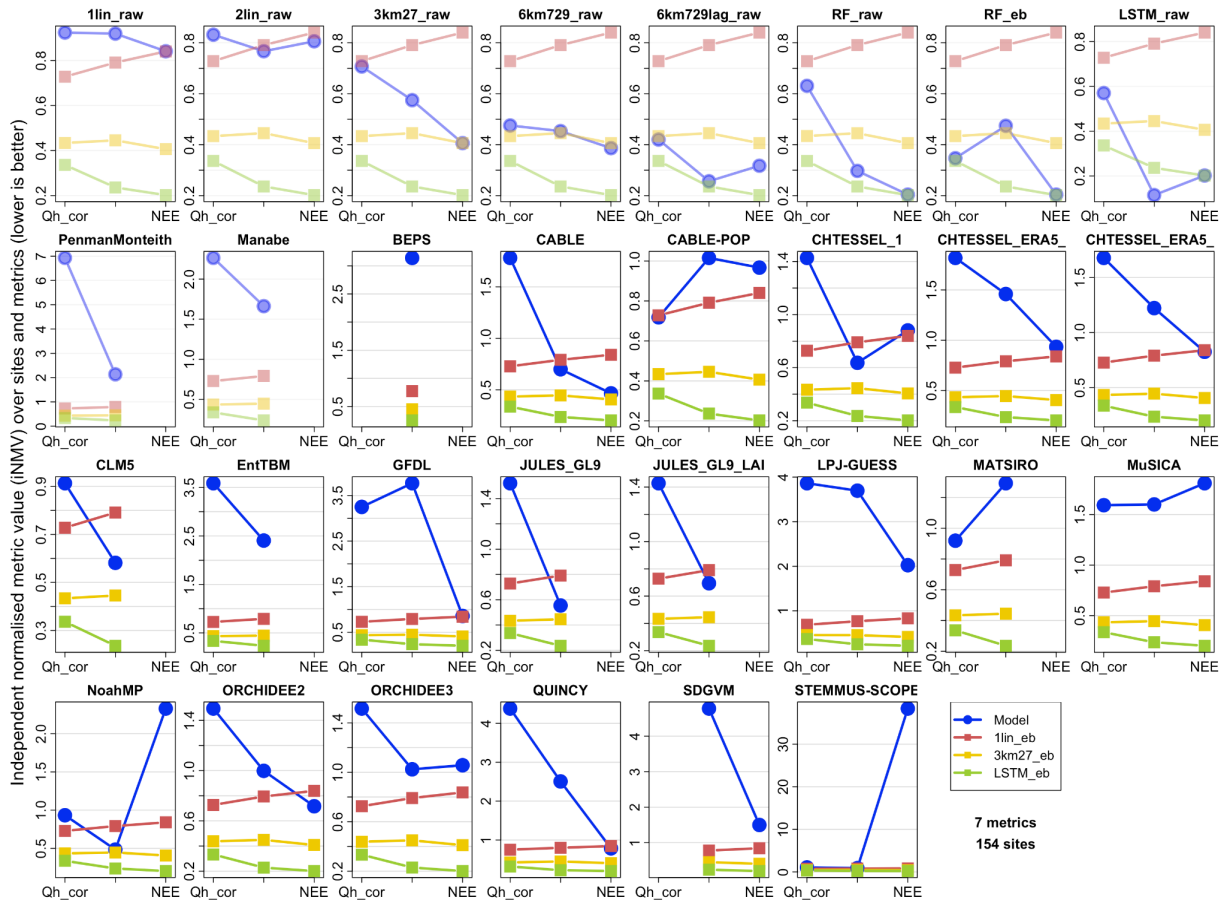

Figure S11c: Same as Figure 5, showing iNMV, but using the energy-balance corrected observed fluxes for Qle and Qh. Note that the empirical benchmarks used here are those trained to target energy balance corrected fluxes (1lin\_eb, 3km27\_eb and LSTM\_eb).

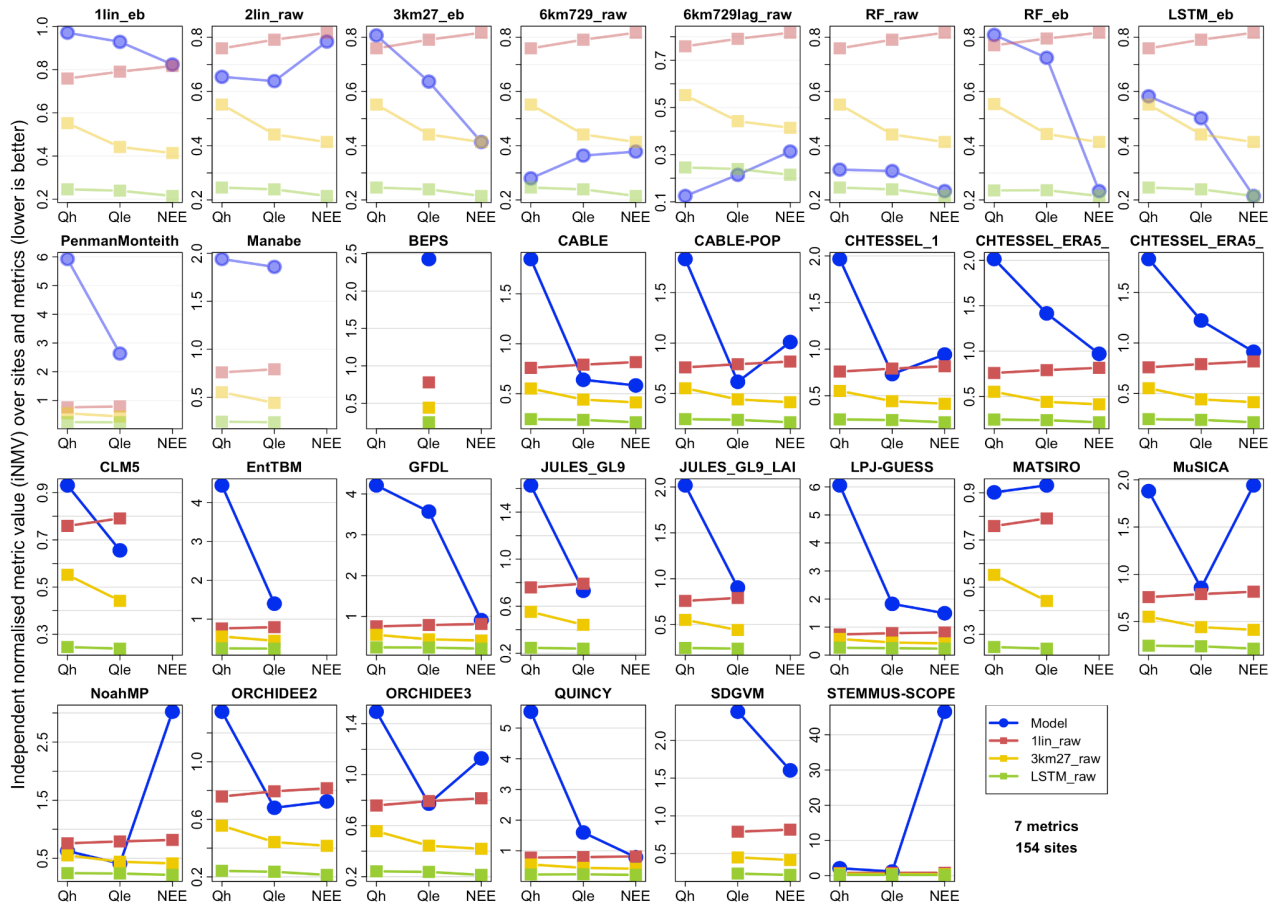

Figure S11d: Same as Figure 6, showing iNMV, using raw fluxes, but showing results filtered for only those time steps with wind speed > 2ms<sup>-1</sup>, typically daytime flux values.

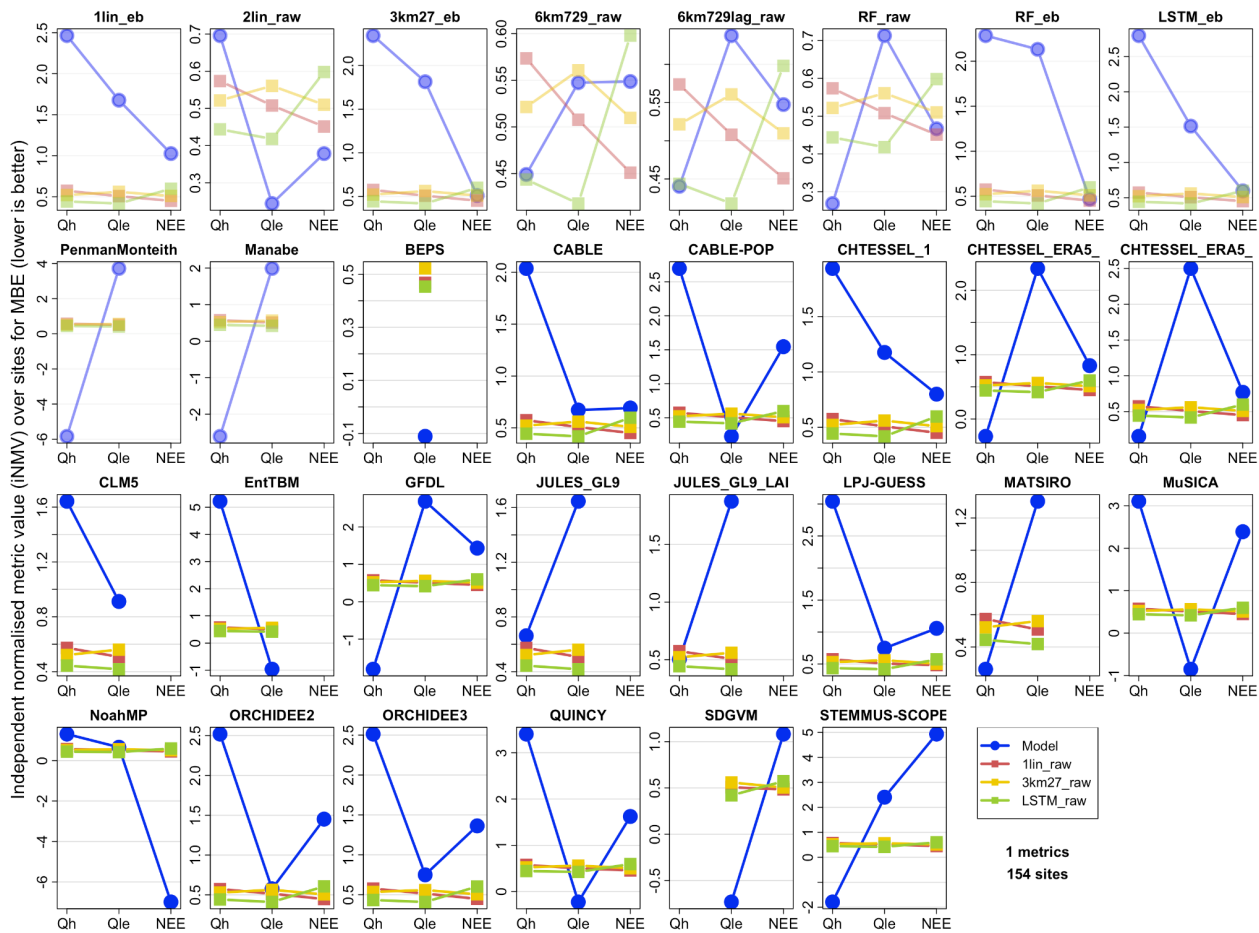

Figure S11e: Same as Figure 6, showing iNMV, using raw fluxes, but showing results only for a single metric in Table S4: Mean Bias Error (MBE).

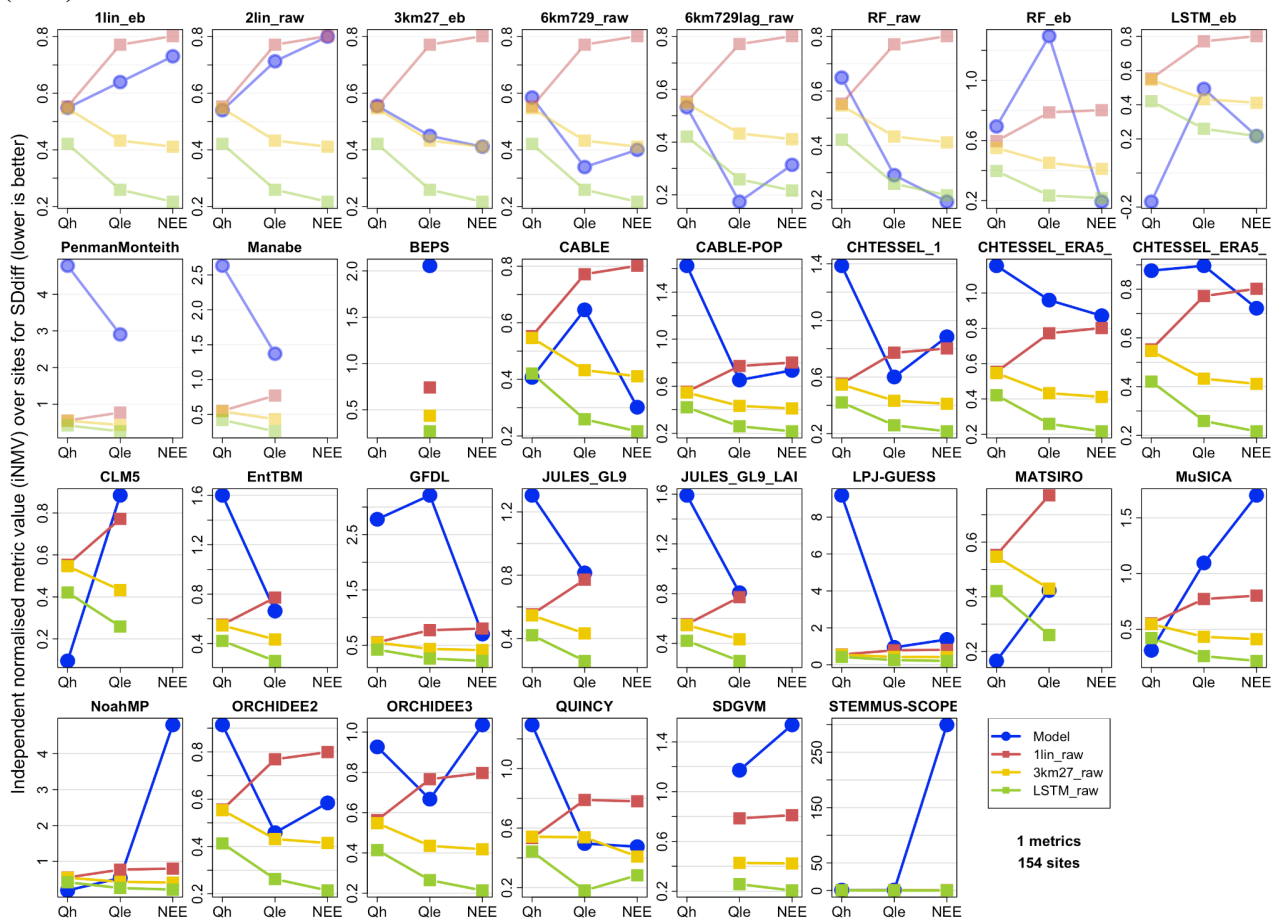

Figure S11f: Same as Figure 6, showing iNMV, using raw fluxes, but showing results only for a single metric in Table S4: Standard Deviation difference (SDdiff).

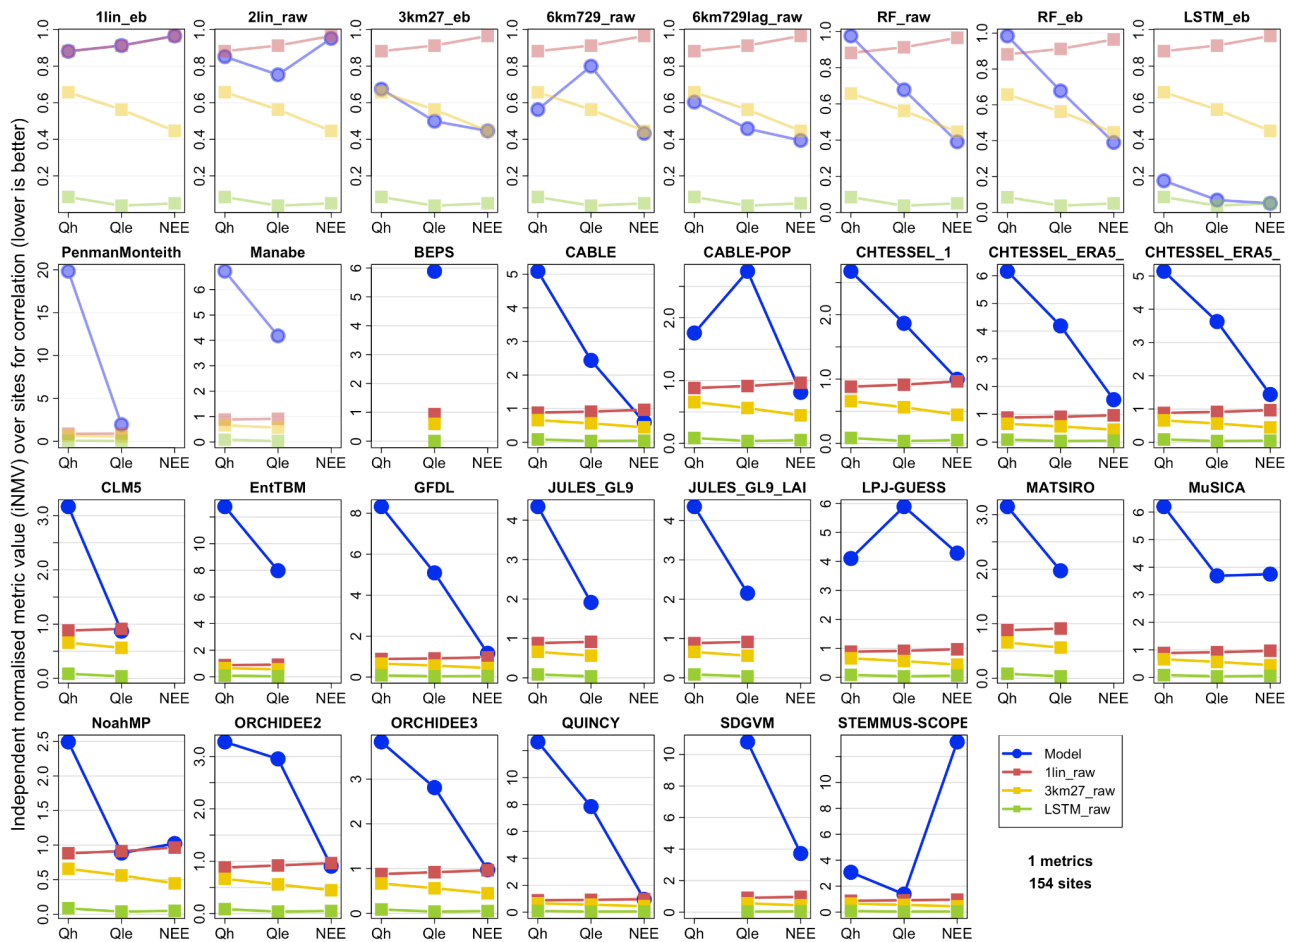

Figure S11g: Same as Figure 6, showing iNMV, using raw fluxes, but showing results only for a single metric in Table S4: Correlation coefficient ( $r$ ).

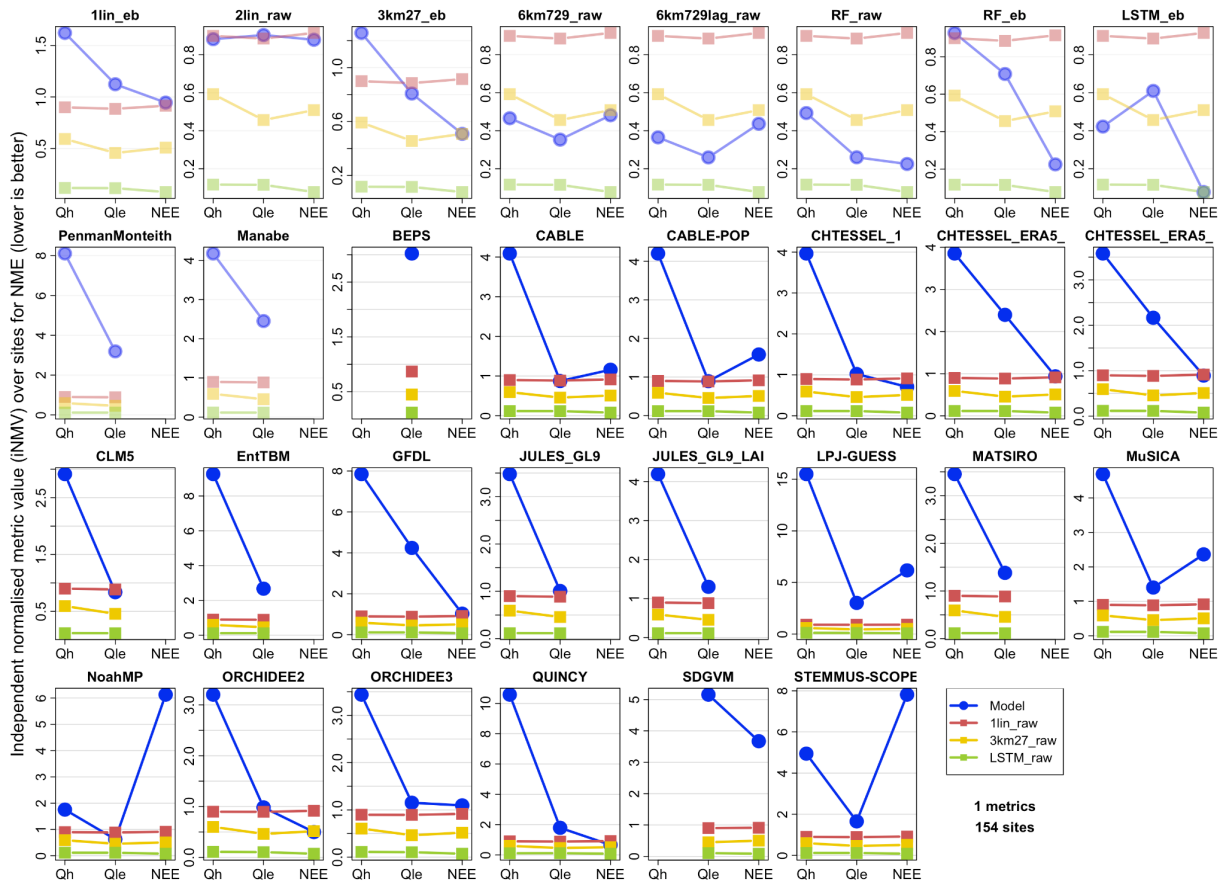

Figure S11h: Same as Figure 6, showing iNMV, using raw fluxes, but showing results only for a single metric in Table S4: Normalised Mean Error (NME).



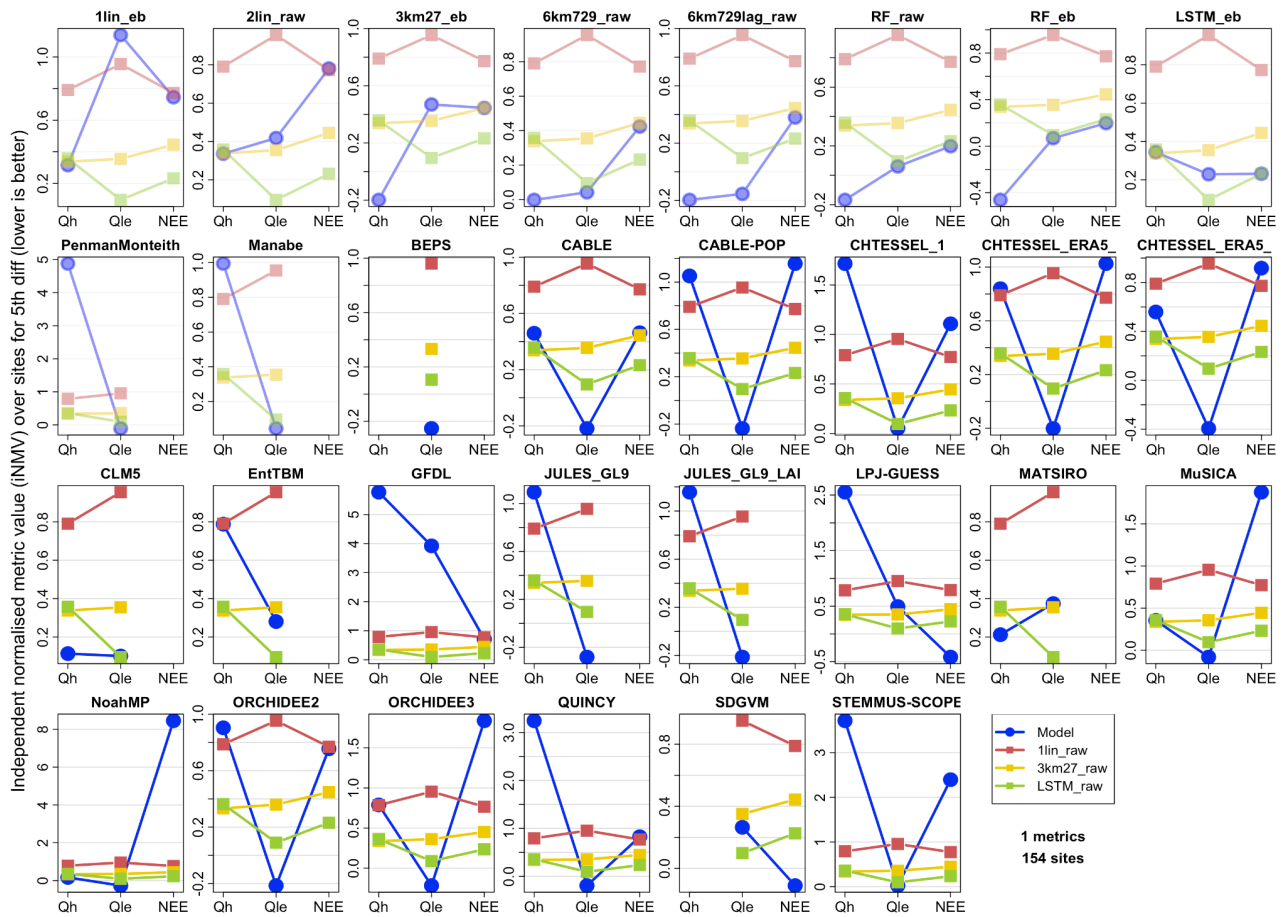

Figure S11i: Same as Figure 6, showing iNMV, using raw fluxes, but showing results only for a single metric in Table S4: 5th percentile difference (5th).

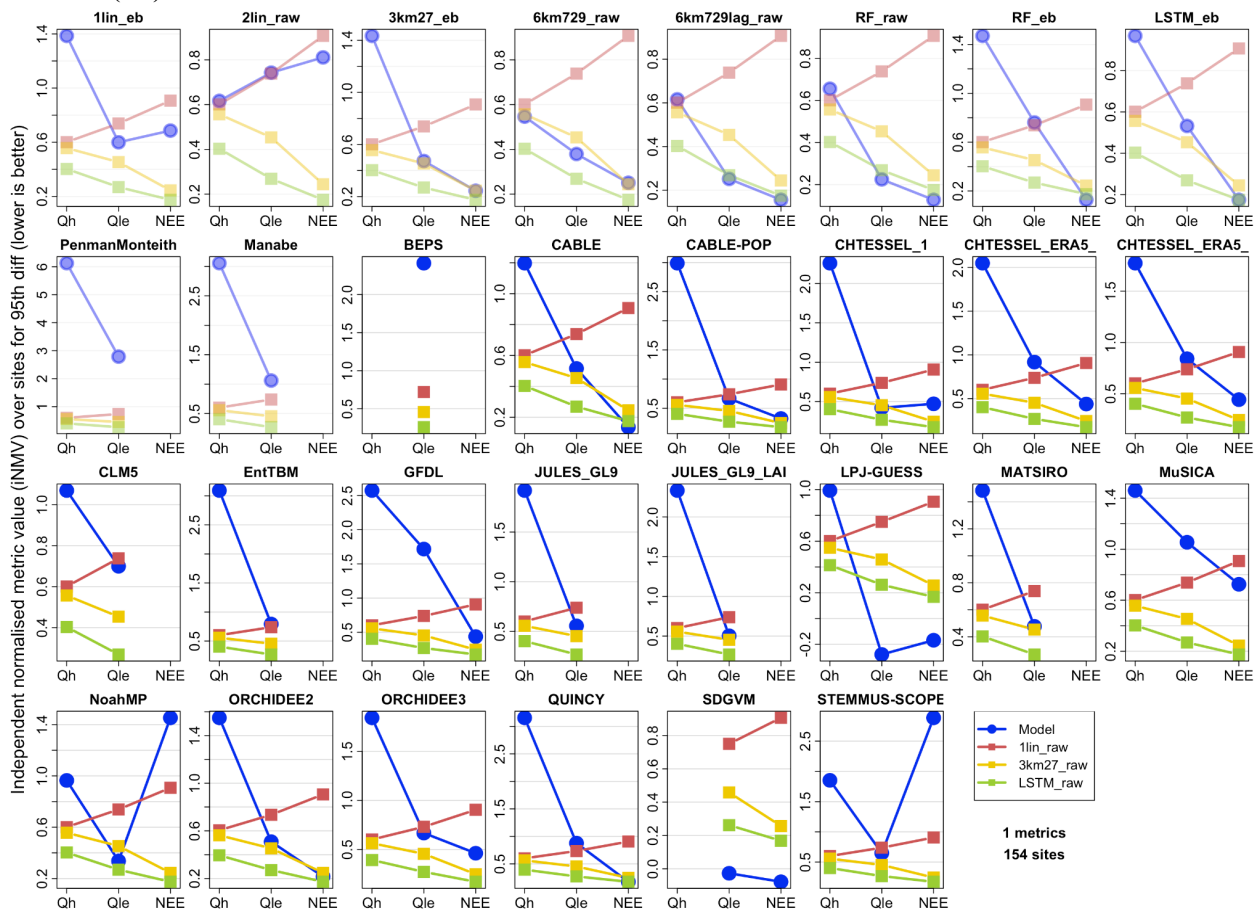

Figure S11j: Same as Figure 6, showing iNMV, using raw fluxes, but showing results only for a single metric in Table S4: 95th percentile difference (95th).

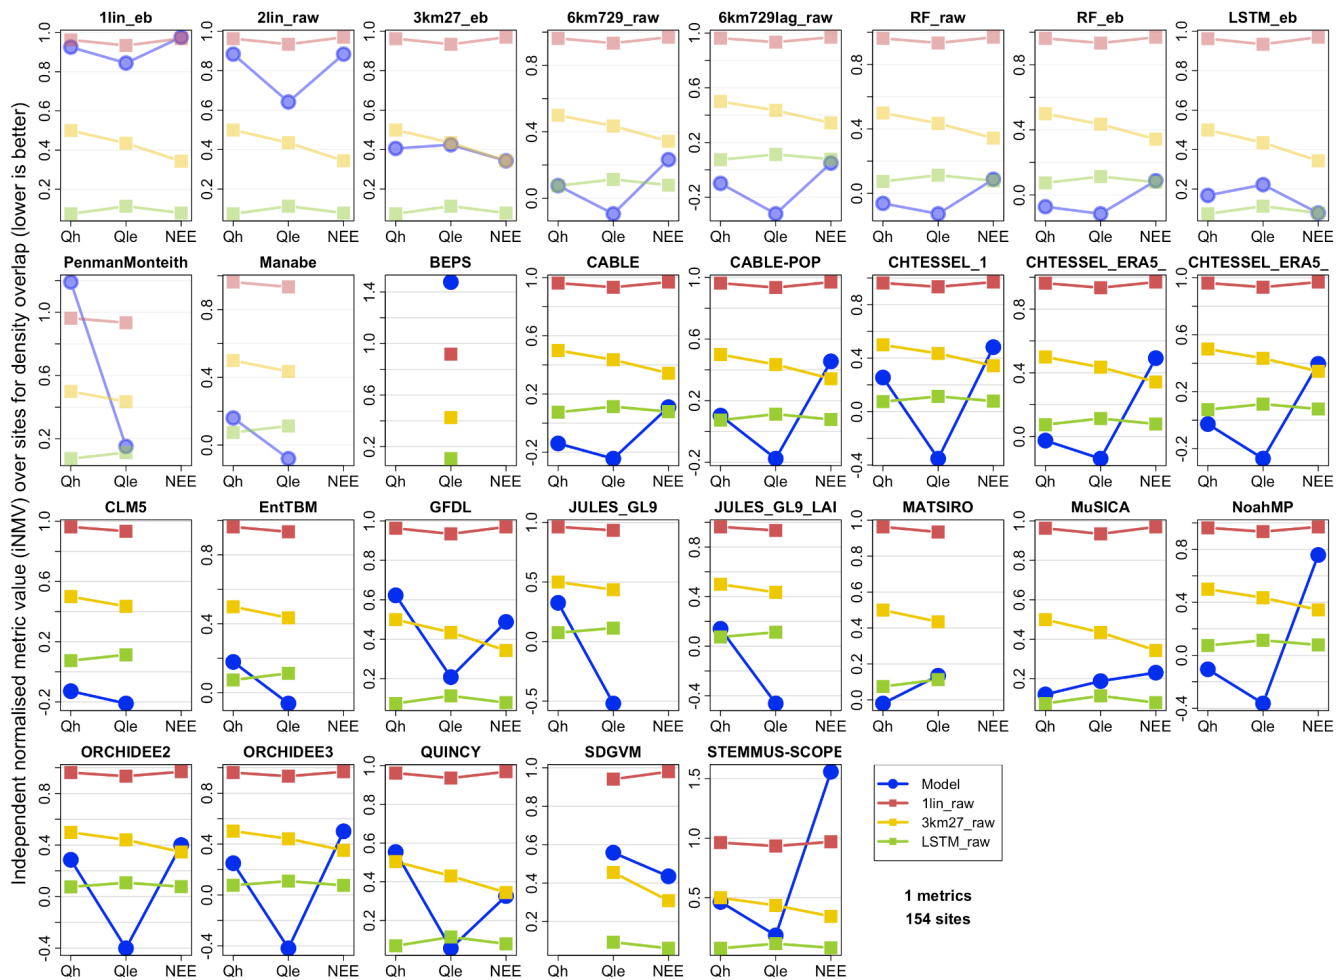

Figure S11k: Same as Figure 6, showing iNMV, using raw fluxes, but showing results only for a single metric in Table S4: Density estimate overlap percentage (PDF).

### Independent normalised metric value (iNMV) improvement in Qle\_cor offered by LSTM\_eb

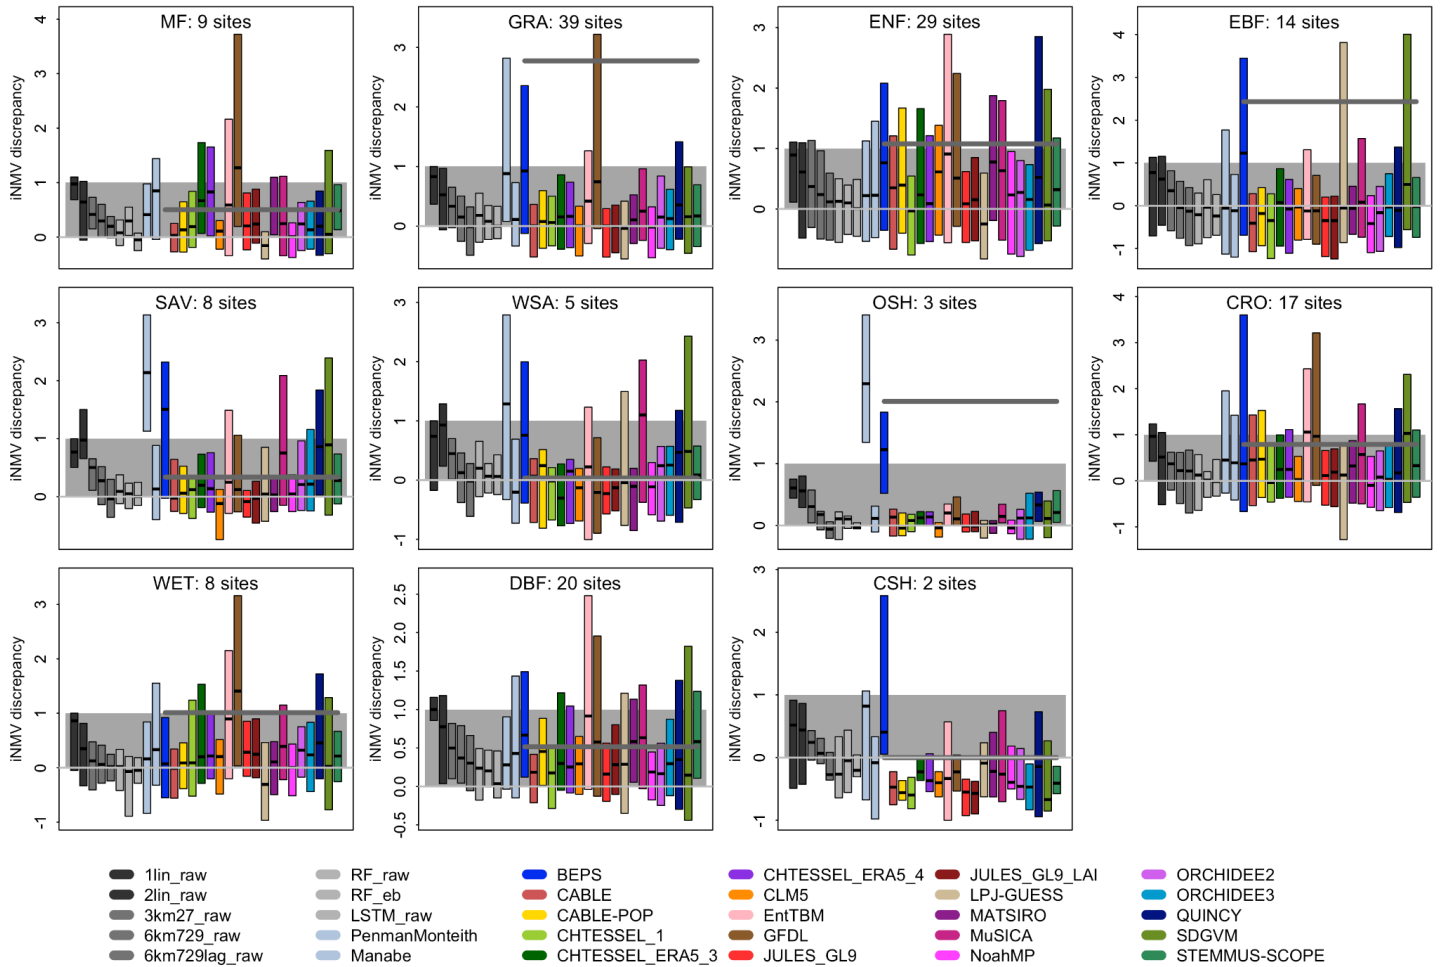

**Figure S12a: Independent normalised metric value (iNMV) discrepancy between each model and LSTM\_eb for latent heat flux (Qle), sorted by vegetation type, as per Figure 7, but using energy-balance corrected Qle. The average of all models for each vegetation type is shown by the dark grey bar and the zero line is in light grey, with 0-1 range (grey shading) representing the range of metric values between 1lin and LSTM\_eb. Vegetation types are: Mixed Forest (MF); Grassland (GRA); Evergreen Needleleaf (ENF); Evergreen Broadleaf (EBF); Savanna (SAV); Woody Savanna (WSA); Open Shrubland (OSH); Cropland (CRO); Wetland (WET); Deciduous Broadleaf (DBF); Closed Shrubland (CSH).**

### Independent normalised metric value (iNMV) improvement in Qh offered by LSTM\_raw

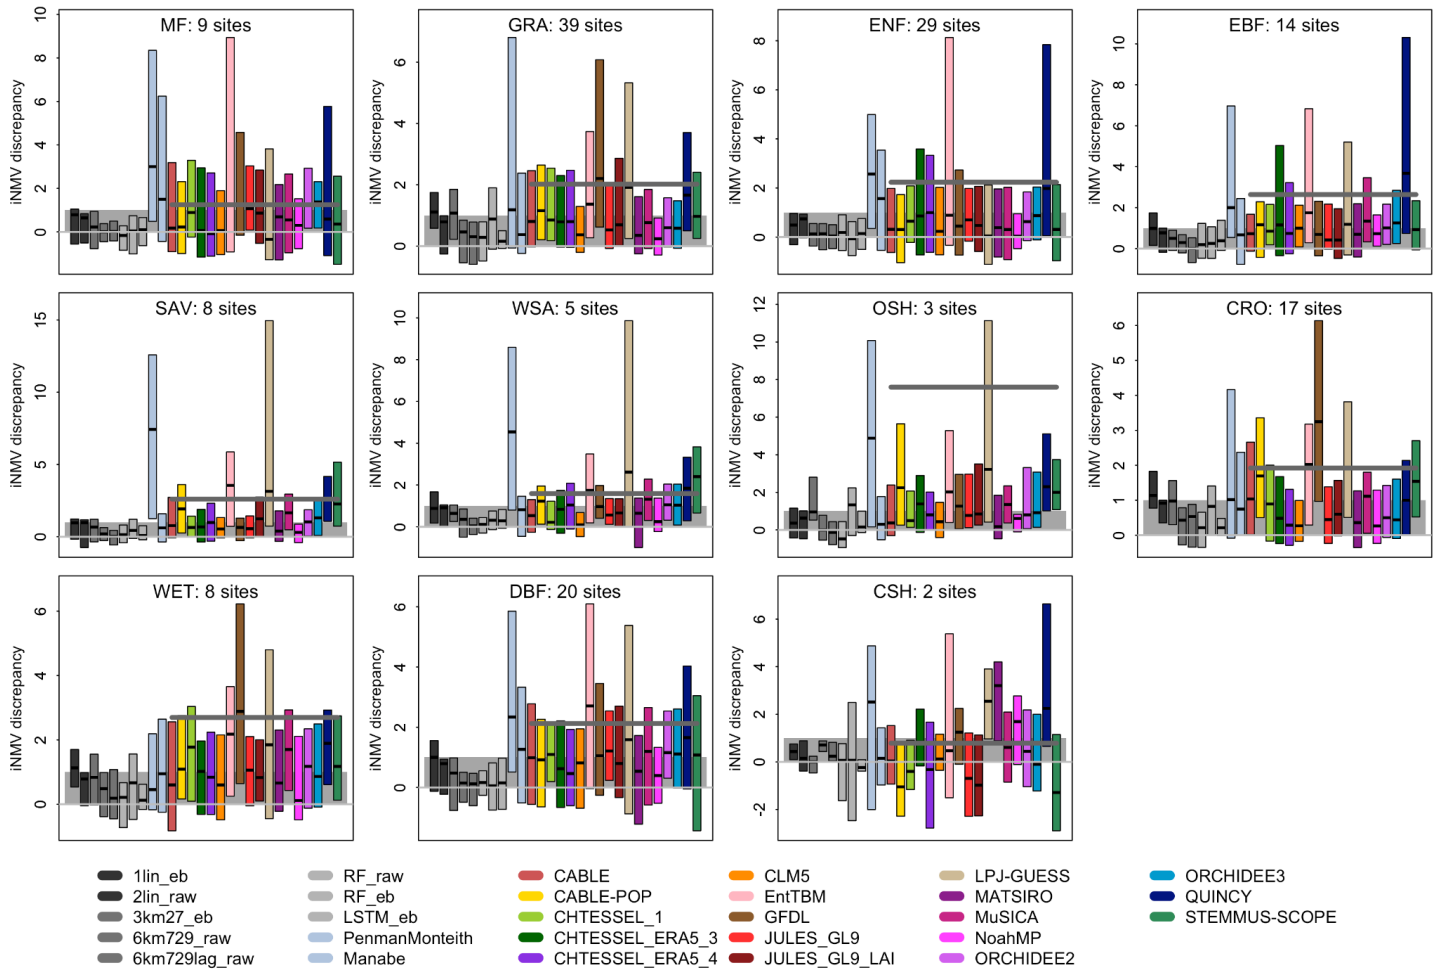

**Figure S12b: Independent normalised metric value (iNMV) discrepancy between each model and LSTM\_raw for sensible heat flux (Qh), using raw fluxes, sorted by vegetation type, as per Figure 7. Vegetation types are: Mixed Forest (MF); Grassland (GRA); Evergreen Needleleaf (ENF); Evergreen Broadleaf (EBF); Savanna (SAV); Woody Savanna (WSA); Open Shrubland (OSH); Cropland (CRO); Wetland (WET); Deciduous Broadleaf (DBF); Closed Shrubland (CSH).**



### Independent normalised metric value (iNMV) improvement in Qh\_cor offered by LSTM\_eb

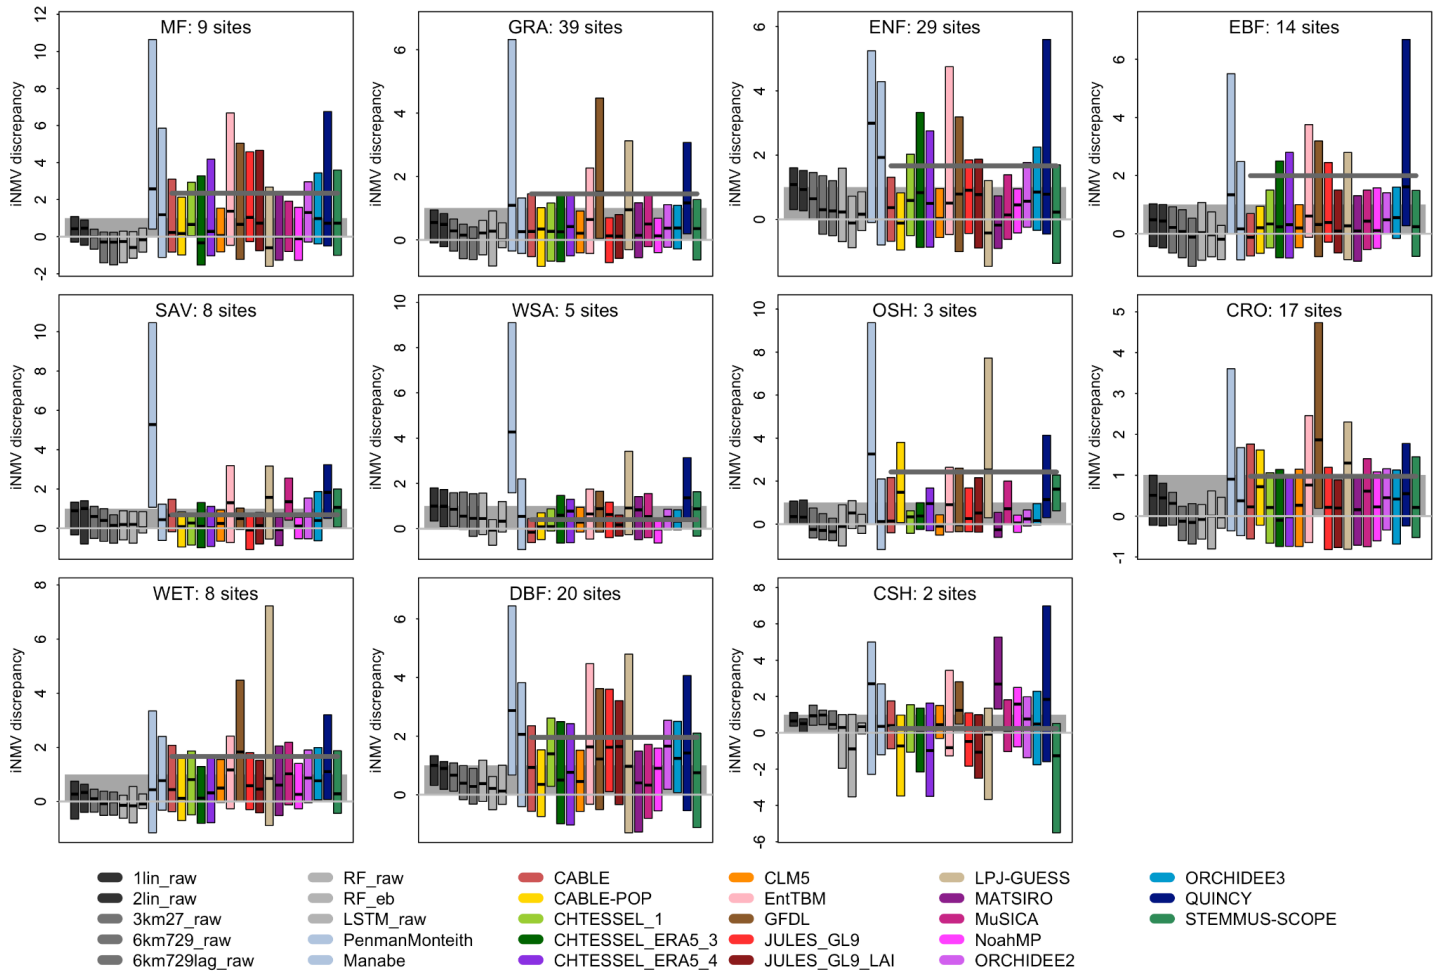

**Figure S12c: Normalised metric value (iNMV) discrepancy between each model and LSTM\_eb for sensible heat flux (Qh), sorted by vegetation type, as per Figure 7, but using energy-balance corrected Qh, with 0-1 range (grey shading) representing the range of metric values between 1lin and LSTM\_eb. Vegetation types are: Mixed Forest (MF); Grassland (GRA); Evergreen Needleleaf (ENF); Evergreen Broadleaf (EBF); Savanna (SAV); Woody Savanna (WSA); Open Shrubland (OSH); Cropland (CRO); Wetland (WET); Deciduous Broadleaf (DBF); Closed Shrubland (CSH).**

### Independent normalised metric value (iNMV) improvement in NEE offered by LSTM\_raw

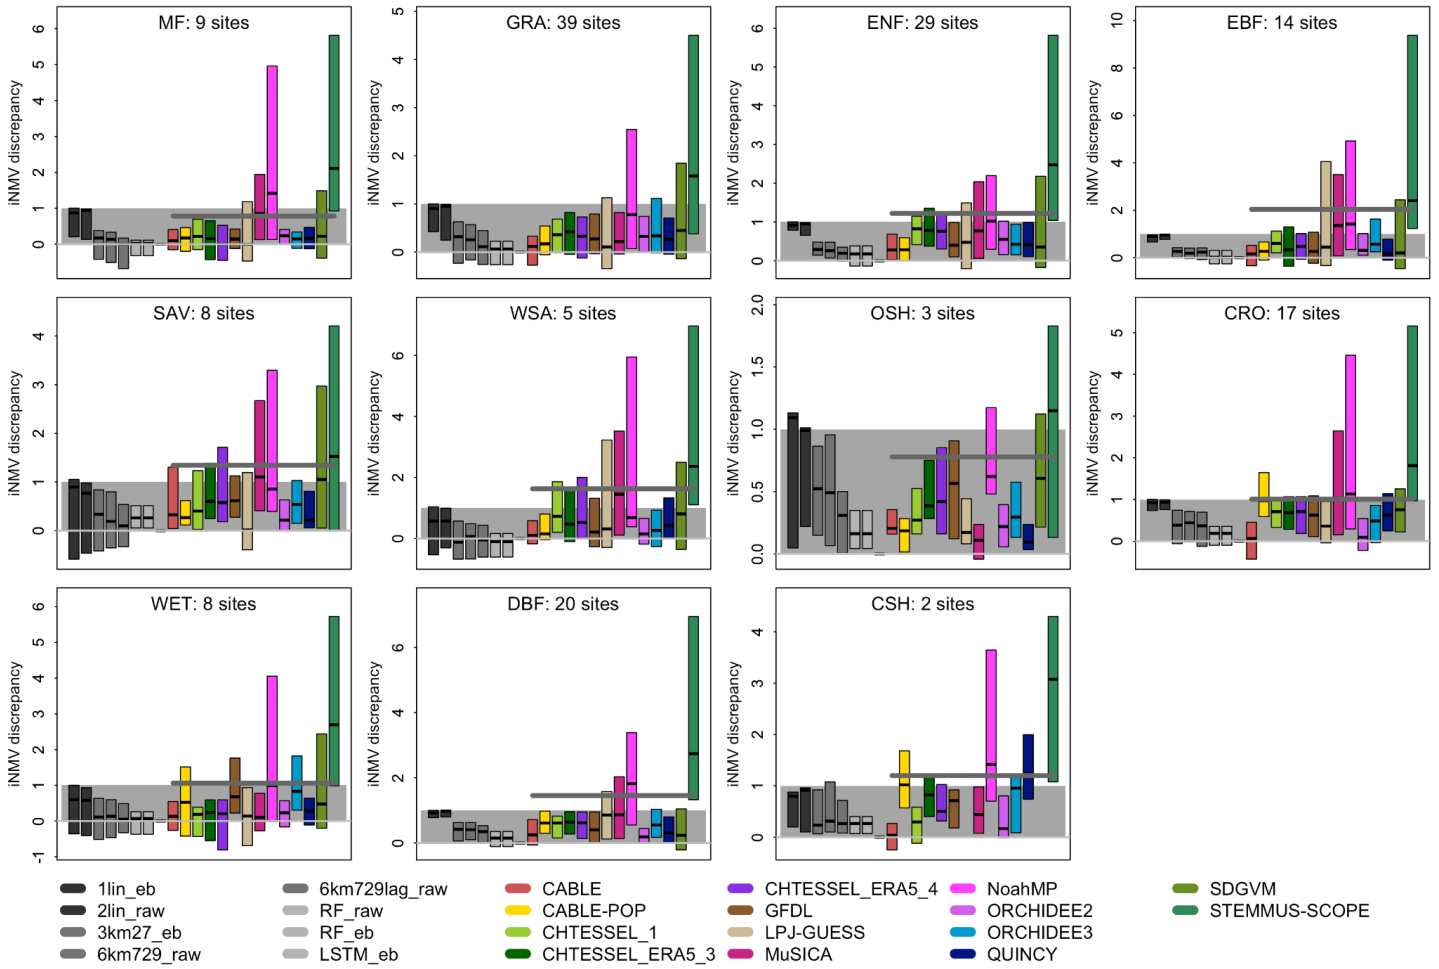

**Figure S12d: Independent normalised metric value (iNMV) discrepancy between each model and LSTM\_raw for net ecosystem exchange (NEE), sorted by vegetation type, as per Figure 7. Vegetation types are: Mixed Forest (MF); Grassland (GRA); Evergreen Needleleaf (ENF); Evergreen Broadleaf (EBF); Savanna (SAV); Woody Savanna (WSA); Open Shrubland (OSH); Cropland (CRO); Wetland (WET); Deciduous Broadleaf (DBF); Closed Shrubland (CSH).**

### Independent normalised metric improvement in Qle offered by LSTM\_raw

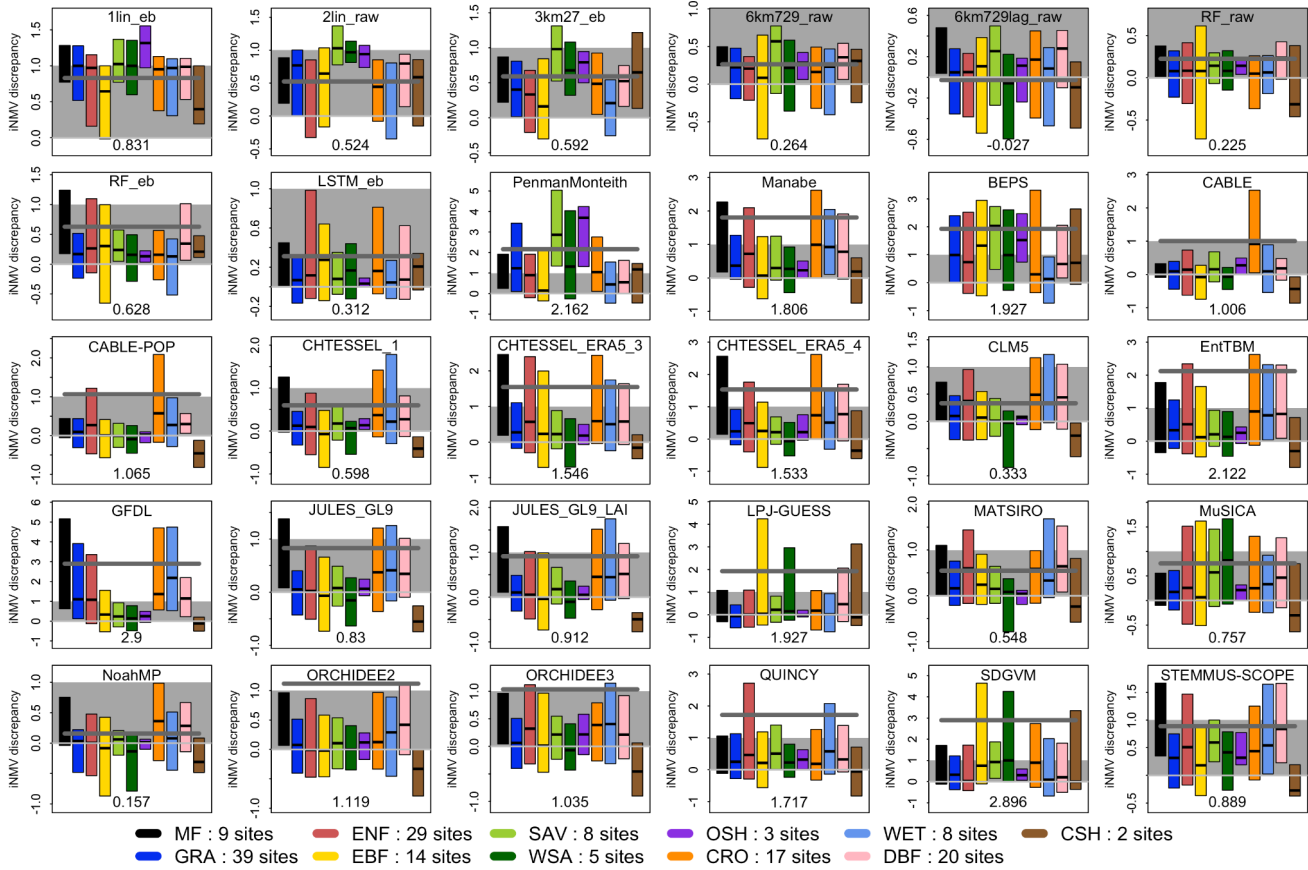

**Figure S13a: Independent normalised metric value (iNMV) discrepancy between each mechanistic model and LSTM\_raw for latent heat flux (Qle), with separate inter-quartile boxes for each vegetation type, using raw fluxes. Mean model discrepancy is shown by the dark grey line and text at the bottom of each panel, with reference empirical model range [0,1] shaded in grey. Vegetation types are: Mixed Forest (MF); Grassland (GRA); Evergreen Needleleaf (ENF); Evergreen Broadleaf (EBF); Savanna (SAV); Woody Savanna (WSA); Open Shrubland (OSH); Cropland (CRO); Wetland (WET); Deciduous Broadleaf (DBF); Closed Shrubland (CSH). Lower scores are better.**

## Independent normalised metric improvement in Qle\_cor offered by LSTM\_eb

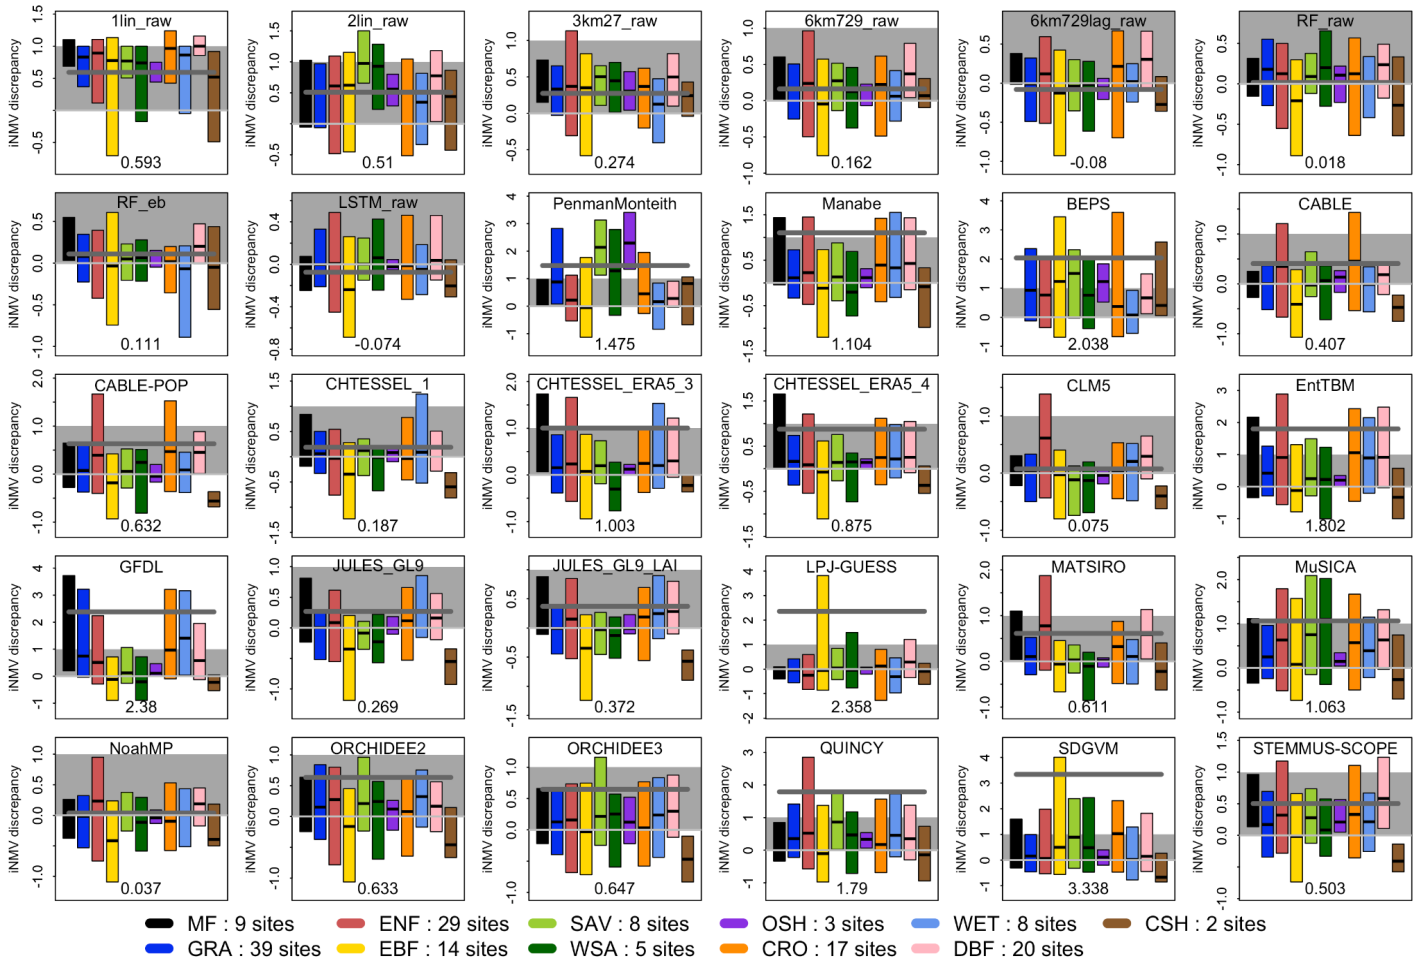

**Figure S13b: Independent normalised metric value (iNMV) discrepancy between each mechanistic model and LSTM\_eb for latent heat flux (Qle), with separate inter-quartile boxes for each vegetation type, using energy balance corrected fluxes. Mean model discrepancy is shown by the dark grey bar and text at the bottom of each panel, with 0-1 range (grey shading) representing the range of metric values between 1lin and LSTM\_eb. Vegetation types are: Mixed Forest (MF); Grassland (GRA); Evergreen Needleleaf (ENF); Evergreen Broadleaf (EBF); Savanna (SAV); Woody Savanna (WSA); Open Shrubland (OSH); Cropland (CRO); Wetland (WET); Deciduous Broadleaf (DBF); Closed Shrubland (CSH).**

### Independent normalised metric improvement in Qh offered by LSTM\_raw

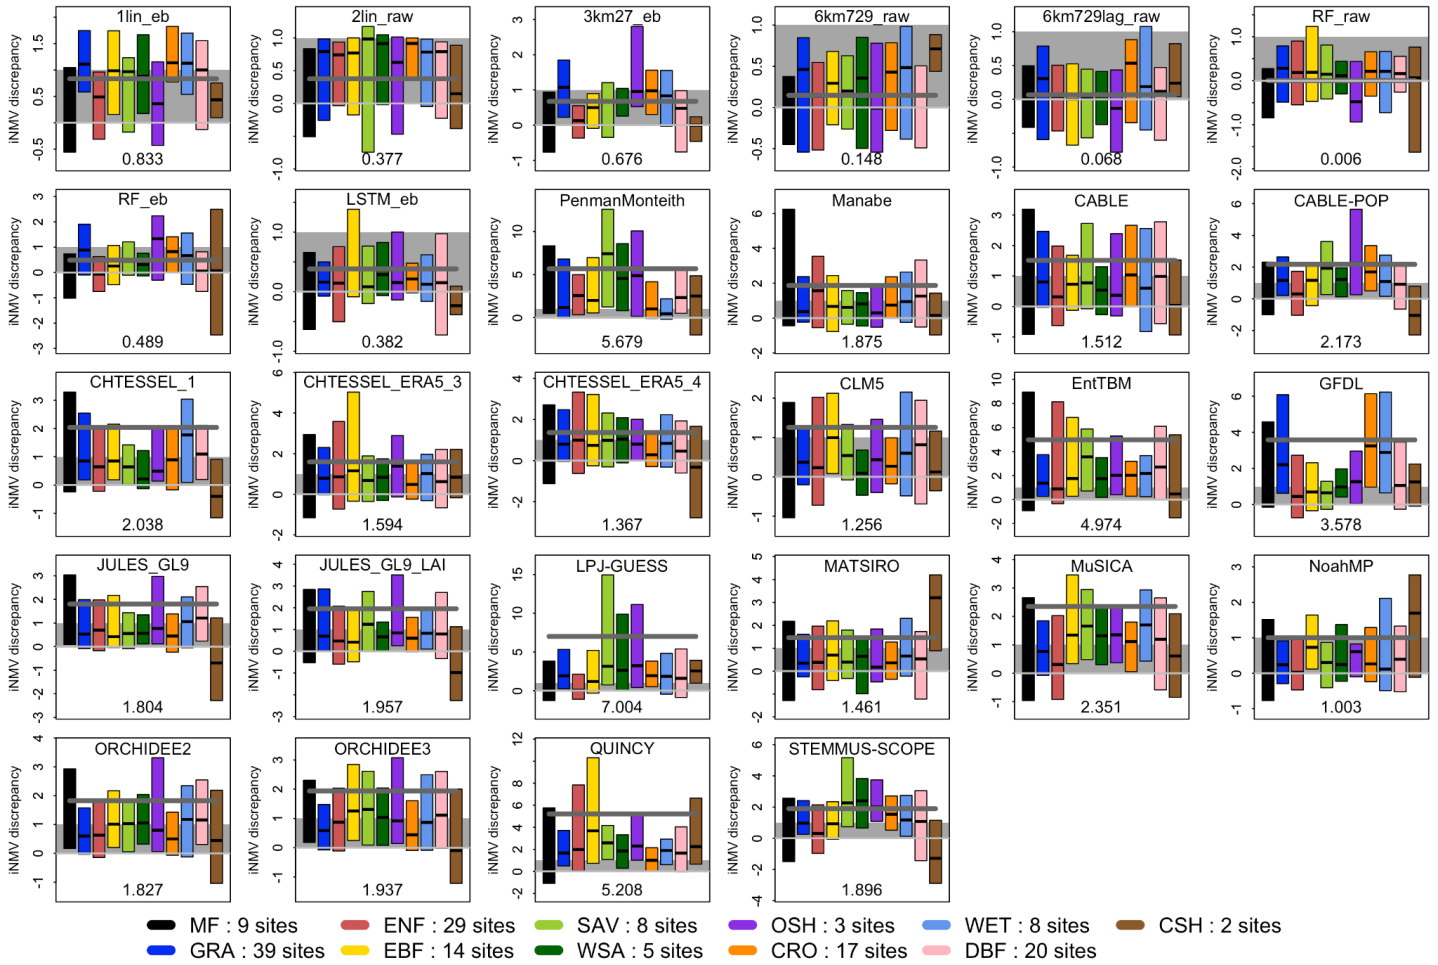

**Figure S13c: Independent normalised metric value (iNMV) discrepancy between each mechanistic model and LSTM\_raw for sensible heat flux (Qh), with separate inter-quartile boxes for each vegetation type, using raw fluxes. Mean model discrepancy is shown by the dark grey bar and text at the bottom of each panel, with 0-1 range (grey shading) representing the range of metric values between 1lin and LSTM\_raw. Vegetation types are: Mixed Forest (MF); Grassland (GRA); Evergreen Needleleaf (ENF); Evergreen Broadleaf (EBF); Savanna (SAV); Woody Savanna (WSA); Open Shrubland (OSH); Cropland (CRO); Wetland (WET); Deciduous Broadleaf (DBF); Closed Shrubland (CSH).**

### Independent normalised metric improvement in Qh\_cor offered by LSTM\_eb

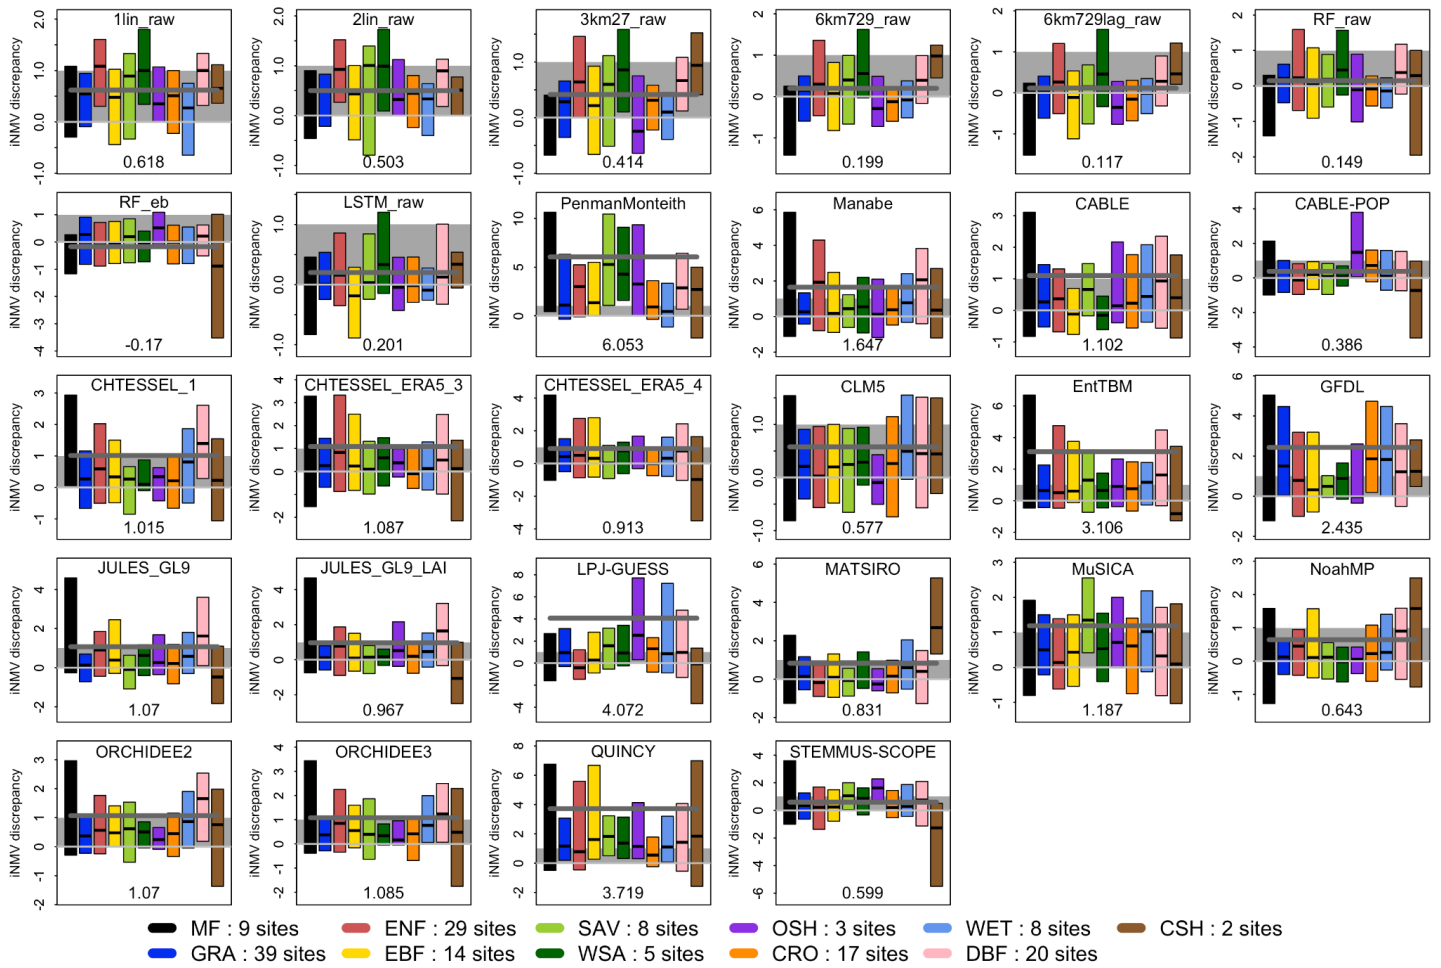

**Figure S13d: Independent normalised metric value (iNMV) discrepancy between each mechanistic model and LSTM\_eb for sensible heat flux (Qh), with separate inter-quartile boxes for each vegetation type, using energy balance corrected fluxes. Mean model discrepancy is shown by the dark grey bar and text at the bottom of each panel, with 0-1 range (grey shading) representing the range of metric values between 1lin and LSTM\_eb. Vegetation types are: Mixed Forest (MF); Grassland (GRA); Evergreen Needleleaf (ENF); Evergreen Broadleaf (EBF); Savanna (SAV); Woody Savanna (WSA); Open Shrubland (OSH); Cropland (CRO); Wetland (WET); Deciduous Broadleaf (DBF); Closed Shrubland (CSH).**

### Independent normalised metric improvement in NEE offered by LSTM\_raw

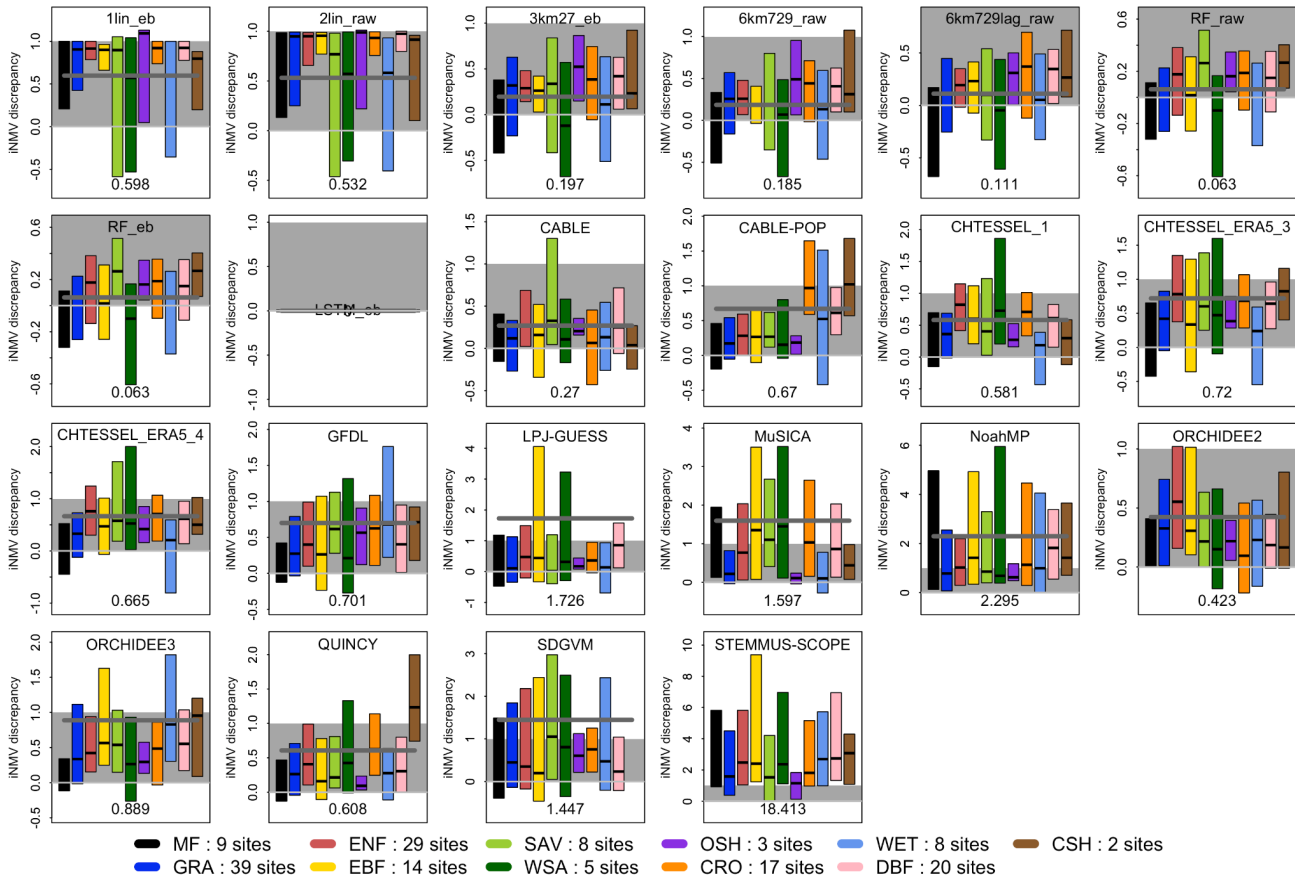

Figure S13c: As per Fig. 13a, but for Net Ecosystem Exchange of CO<sub>2</sub> (NEE), for those LMs that reported NEE. Lower scores are better.

### Independent NMV improvement in Qle\_cor offered by LSTM\_eb over all models

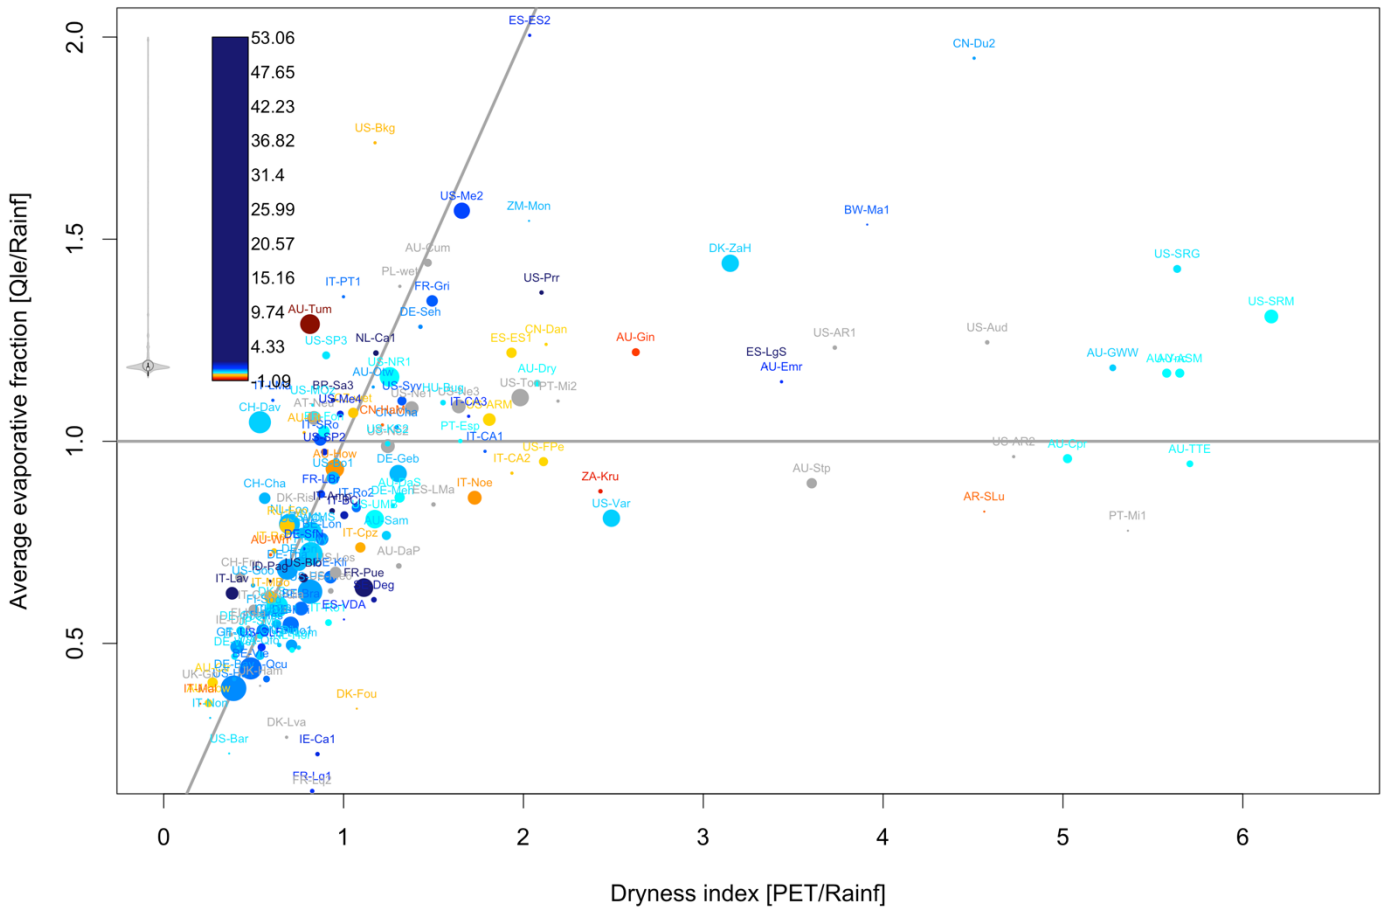

Figure S14a: Independent normalised metric value (iNMV) improvement offered by LSTM over the median iNMV value of all models, shown by colour for latent heat flux (Qle). Each site's location is shown on axes of observed evaporative fraction versus dryness index. The prevalence of particular colour values is shown by the violin plot to the left of the colour legend. Values within [-0.1,0.1] are shown in pink, and values above 2 have constant, dark blue colour. This is the same as Figure 8, but using energy-balance corrected Qle (which both changes the colour scale and location of sites on the graph). Dot sizes indicate the length of site data, ranging from 1 (smallest) to 21 years (largest) - see Table S2 for site details.





### Independent NMV improvement in Qh\_cor offered by LSTM\_eb over all models

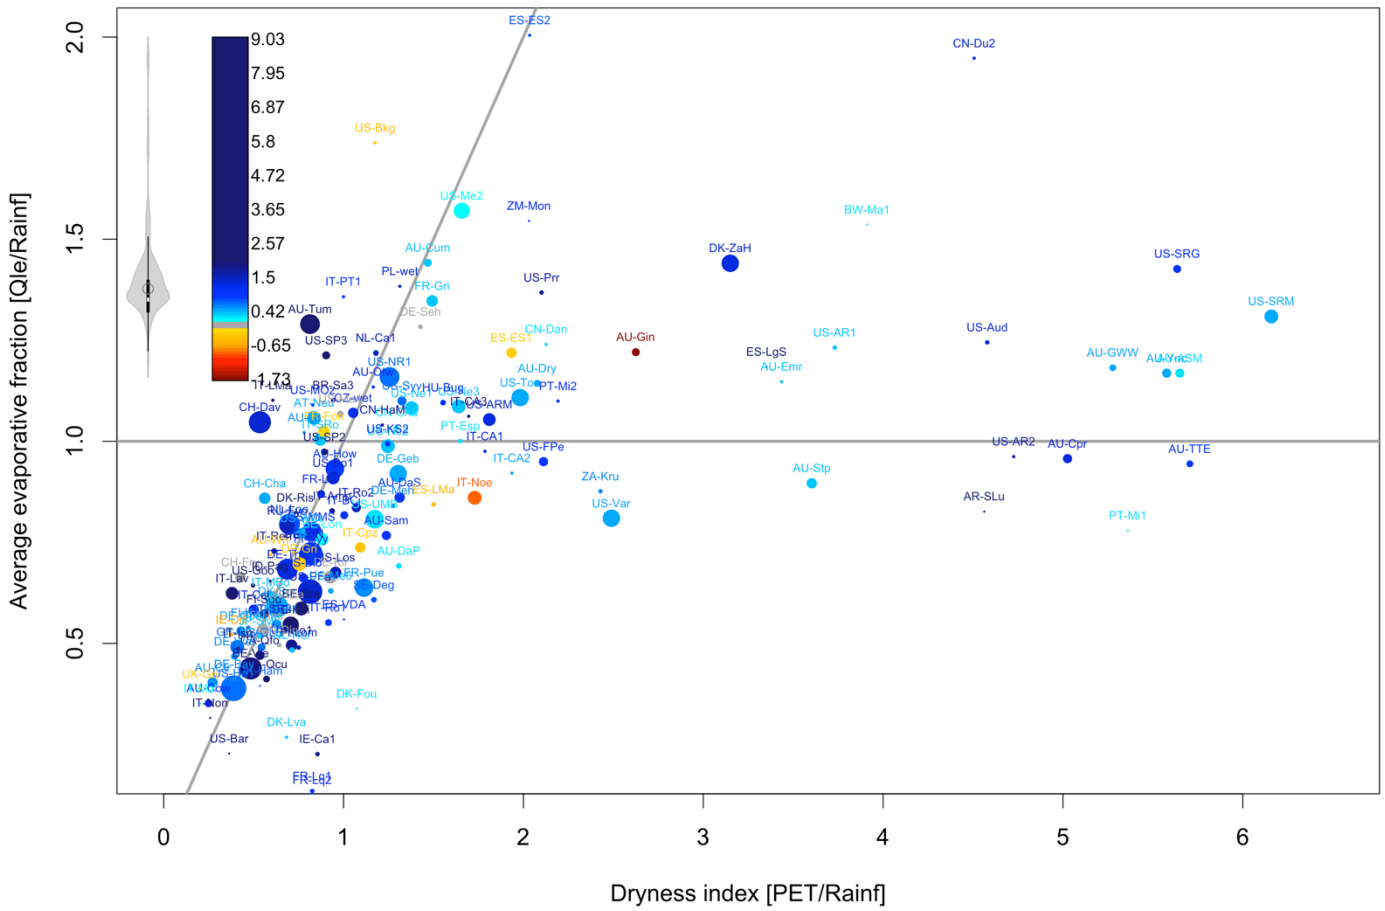

Figure S14c: Average normalised metric improvement offered by LSTM over each model in simulating sensible heat flux (Qh), averaged over all LMs (colour scale, excluding empirical models), with each site's location shown on axes of observed evaporative fraction versus dryness index. The prevalence of particular colour values is shown by the violin plot to the left of the colour legend. This is the same as Figure S14b, but using energy-balance corrected Qh (which changes the colour scale) and Qle (which changes location of sites on the graph). Dot sizes indicate the length of site data, ranging from 1 (smallest) to 21 years (largest) - see Table S2 for site details.



## References

- Balsamo, G., Viterbo, P., Beljaars, A., van den Hurk, B., Hirschi, M., Betts, A. K., and Scipal, K.: A Revised Hydrology for the ECMWF Model: Verification from Field Site to Terrestrial Water Storage and Impact in the Integrated Forecast System, *J. Hydrometeorol.*, 10, 623–643, <https://doi.org/10.1175/2008JHM1068.1>, 2009.
- Best, M. J., Pryor, M., Clark, D. B., Rooney, G. G., Essery, R. L. H., Ménard, C. B., Edwards, J. M., Hendry, M. A., Porson, A., Gedney, N., Mercado, L. M., Sitch, S., Blyth, E., Boucher, O., Cox, P. M., Grimmond, C. S. B., and Harding, R. J.: The Joint UK Land Environment Simulator (JULES), model description – Part 1: Energy and water fluxes, *Geosci. Model Dev.*, 4, 677–699, <https://doi.org/10.5194/gmd-4-677-2011>, 2011.
- Clark, D. B., Mercado, L. M., Sitch, S., Jones, C. D., Gedney, N., Best, M. J., Pryor, M., Rooney, G. G., Essery, R. L. H., Blyth, E., Boucher, O., Harding, R. J., Huntingford, C., and Cox, P. M.: The Joint UK Land Environment Simulator (JULES), model description – Part 2: Carbon fluxes and vegetation dynamics, *Geosci. Model Dev.*, 4, 701–722, <https://doi.org/10.5194/gmd-4-701-2011>, 2011.
- Dunne, J. P., Horowitz, L. W., Adcroft, A. J., Ginoux, P., Held, I. M., John, J. G., Krasting, J. P., Malyshev, S., Naik, V., Paulot, F., Shevliakova, E., Stock, C. A., Zadeh, N., Balaji, V., Blanton, C., Dunne, K. A., Dupuis, C., Durachta, J., Dussin, R., Gauthier, P. P. G., Griffies, S. M., Guo, H., Hallberg, R. W., Harrison, M., He, J., Hurlin, W., McHugh, C., Menzel, R., Milly, P. C. D., Nikonov, S., Paynter, D. J., Ploshay, J., Radhakrishnan, A., Rand, K., Reichl, B. G., Robinson, T., Schwarzkopf, D. M., Sentman, L. T., Underwood, S., Vahlenkamp, H., Winton, M., Wittenberg, A. T., Wyman, B., Zeng, Y., Zhao, M.: The GFDL Earth System Model Version 4.1 (GFDL-ESM 4.1): Overall coupled model description and simulation characteristics. *J. Adv. Model Earth Syst.*, 12, e2019MS002015. <https://doi.org/10.1029/2019MS002015>, 2020.
- Dutra, E., Balsamo, G., Viterbo, P., Miranda, P. M. A., Beljaars, A., Schär, C., and Elder, K.: An improved snow scheme for the ECMWF land surface model: description and offline validation, *J. Hydrometeorol.*, 11, 899–916, <https://doi.org/10.1175/2010JHM1249.1>, 2010.
- Gennaretti, F., Ogee, J., Sainte-Marie, J. and Cuntz, M.: Mining ecophysiological responses of European beech ecosystems to drought, *Agr. Forest Meteorol.*, 280, 107780, doi: 10.1016/j.agrformet.2019.107780, 2020.
- Haverd, V., Smith, B., Cook, G., Briggs, P., Nieradzik, L., Roxburgh, S., Liedloff, A., Meyer, C., and Canadell, J.: A stand-alone tree demography and landscape structure module for Earth system models. *Geophys. Res. Lett.*, 40(19), 5234–5239. <https://doi.org/10.1002/grl.50972>, 2013.
- Haverd, V., Cuntz, M., Nieradzik, L. P., and Harman, I. N.: Improved representations of coupled soil–canopy processes in the CABLE land surface model (Subversion revision 3432), *Geosci. Model Dev.*, 9, 3111–3122, <https://doi.org/10.5194/gmd-9-3111-2016>, 2016.
- Haverd, V., Smith, B., Nieradzik, L., Briggs, P. R., Woodgate, W., Trudinger, C. M., Canadell, J. G., and Cuntz, M.: A new version of the CABLE land surface model (Subversion revision r4601) incorporating land use and land cover change, woody vegetation demography, and a novel optimisation-based approach to plant coordination of photosynthesis, *Geosci. Model Dev.*, 11, 2995–3026, <https://doi.org/10.5194/gmd-11-2995-2018>, 2018.

- He, C., Valayamkunnath, P., Barlage, M., Chen, F., Gochis, D., Cabell, R., Schneider, T., Rasmussen, R., Niu, G.-Y., Yang, Z.-L., Niyogi, D., and Ek, M.: Modernizing the open-source community Noah with multi-parameterization options (Noah-MP) land surface model (version 5.0) with enhanced modularity, interoperability, and applicability, *Geosci. Model Dev.*, 16, 5131–5151, <https://doi.org/10.5194/gmd-16-5131-2023>, 2023.
- Hengl, T., Mendes de Jesus, J., Heuvelink, G. B. M., Ruiperez Gonzalez, M., Kilibarda, M., Blagotić, A., Shangguan, W., Wright, M. N., Geng, X., Bauer-Marschallinger, B., Guevara, M. A., Vargas, R., MacMillan, R. A., Batjes, N. H., Leenaars, J. G. B., Ribeiro, E., Wheeler, I., Mantel, S., and Kempen, B.: SoilGrids250m: Global gridded soil information based on machine learning, *PLoS ONE*, 12, e0169748, <https://doi.org/10.1371/journal.pone.0169748>, 2017.
- Kim, Y., P.R. Moorcroft, I. Aleinov, M.J. Puma, and N.Y. Kiang : Variability of phenology and fluxes of water and carbon with observed and simulated soil moisture in the Ent Terrestrial Biosphere Model (Ent TBM version 1.0.1.0.0). *Geosci. Model Dev.*, doi:10.5194/gmd-8-3837-2015, 2015.
- Kowalczyk, E. A., Y. P. Wang, R. M. Law, H. L. Davies, J. L. McGregor, and G. S. Abramowitz, The CSIRO Atmosphere Biosphere Land Exchange (CABLE) model for use in climate models and as an offline model. CSIRO Marine and Atmospheric Research Paper 013, 43 pp., <https://doi.org/10.4225/08/58615c6a9a51d>, 2006.
- Krinner, G., Viovy, N., de Noblet-Ducoudré, N., Ogée, J., Polcher, J., Friedlingstein, P., Ciais, P., Sitch, S. and Prentice, I. C.: A dynamic global vegetation model for studies of the coupled atmosphere-biosphere system, *Global Biogeochem. Cy.*, 19, GB1015, doi:10.1029/2003GB002199, 2005.
- Kumar, S. V., Peters-Lidard, C. D., Tian, Y., Houser, P. R., Geiger, J., Olden, S., Lighty, L., Eastman, J. L., Doty, B., Dirmeyer, P., Adams, J., Mitchell, K., Wood, E. F. and Sheffield, J.: Land information system: An interoperable framework for high resolution land surface modeling. *Environ. Modell. Software*, 21, 1402–1415, <https://doi.org/10.1016/j.envsoft.2005.07.004>, 2006.
- Liu, J., Chen, J. M., Cihlar, J., Park, W. M.: A process-based boreal ecosystem productivity simulator using remote sensing inputs, *Remote Sens. Environ.*, Volume 62, Issue 2, Pages 158-175, ISSN 0034-4257, [https://doi.org/10.1016/S0034-4257\(97\)00089-8](https://doi.org/10.1016/S0034-4257(97)00089-8), 1997.
- MATSIRO6 Document Writing Team, Description of MATSIRO6, CCSR Re- port No. 66, Division of Climate System Research, Atmosphere and Ocean Research Institute, The University of Tokyo, <https://doi.org/10.15083/0002000181>, 2021.
- Niu, G.-Y., Yang, Z.-L., Mitchell, K. E., Chen, F., Ek, M. B., Barlage, M., Kumar, A., Manning, K., Niyogi, D., Rosero, E., Tewari, M., Xia, Y.: The community Noah land surface model with multiparameterization options (Noah-MP): 1. Model description and evaluation with local-scale measurements. *J. Geophys. Res.*, 116, D12109, doi: 10.1029/2010JD015139, 2011.
- Ogée, J., Brunet, Y., Loustau, D., Berbigier, P., and Delzon, S.: MuSICA, a CO<sub>2</sub>, water and energy multilayer, multileaf pine forest model: evaluation from hourly to yearly time scales and sensitivity analysis, *Glob. Change Biol.*, 9, 697–717, doi:10.1046/j.1365-2486.2003.00628.x, 2003.
- Smith, B., Wårlind, D., Arneth, A., Hickler, T., Leadley, P., Siltberg, J., and Zaehle, S.: Implications of incorporating N cycling and N limitations on primary production in an individual-based dynamic vegetation model, *Biogeosci.*, 11, 2027–2054, <https://doi.org/10.5194/bg-11-2027-2014>, 2014.

Thum, T., Caldararu, S., Engel, J., Kern, M., Pallandt, M., Schnur, R., Yu, L., and Zaehle, S.: A new model of the coupled carbon, nitrogen, and phosphorus cycles in the terrestrial biosphere (QUINCY v1.0; revision 1996), *Geosci. Model Dev.*, 12, 4781–4802, <https://doi.org/10.5194/gmd-12-4781-2019>, 2019.

van den Hurk, B. J. J. M., Viterbo, P., Beljaars, A. C. M., and Betts, A. K.: Offline validation of the ERA-40 surface scheme. ECMWF Tech. Memo. No. 295, 2000.

Walker, A. P., Quaife, T., van Bodegom, P. M., De Kauwe, M. G., Keenan, T. F., Joiner, J., Lomas, M. R., MacBean, N., Xu, C. G., Yang, X., J., and Woodward, F. I.: The impact of alternative trait-scaling hypotheses for the maximum photosynthetic carboxylation rate ( $V_{cmax}$ ) on global gross primary production, *New Phytol.*, 215, 1370–1386, 2017.

Wang, Y. P., Kowalczyk, E., Leuning, R., Abramowitz, G., Raupach, M. R., Pak, B., van Gorsel, E. and Luhar, A.: Diagnosing errors in a land surface model (CABLE) in the time and frequency domains. *J. Geophys. Res.*, 116, G01034, doi:10.1029/2010JG001385, 2011.

Wang, Y., Zeng, Y., Yu, L., Yang, P., Van der Tol, C., Yu, Q., Lü, X., Cai, H., and Su, Z.: Integrated modeling of canopy photosynthesis, fluorescence, and the transfer of energy, mass, and momentum in the soil–plant–atmosphere continuum (STEMMUS–SCOPE v1.0.0), *Geosci. Model Dev.*, 14, 1379–1407, <https://doi.org/10.5194/gmd-14-1379-2021>, 2021.

Woodward, F.I., Smith, T. M., and Emanuel, W.R.: A global land primary productivity and phytogeography model, *Global Biogeochem. Cy.*, 9, 471–490, <https://doi.org/10.1029/95GB02432>, 1995.

Woodward, F.I., and Lomas, M. R.: Vegetation dynamics – simulating responses to climatic change, *Biol. Rev.*, 79, 643–670, DOI: 10.1017/s1464793103006419, 2004.
